# Supplementary material for: Chemoselective and metal-free reduction of α,β-unsaturated ketones by in situ produced benzeneselenol from O-(tert-butyl) Se-phenyl selenocarbonate
Source: Royal Society of Chemistry journal article supplement (doi:10.1039/d0ra07128e), 2020-01-01

**Chemoselective and metal-free reduction of  $\alpha,\beta$ -unsaturated ketones by in-situ produced benzeneselenol from O-(tert-Butyl) Se-phenyl selenocarbonate**

Andrea Temperini,<sup>\*†</sup> Marco Ballarotto<sup>†</sup> and Carlo Siciliano<sup>‡</sup>

<sup>†</sup> *Dipartimento di Scienze Farmaceutiche, Università di Perugia, Consorzio C.I.N.M.P.I.S., Via del Liceo 1, 06123 Perugia, Italy*

<sup>‡</sup> *Dipartimento di Farmacia e Scienze della Salute e della Nutrizione, Università della Calabria, Edificio Polifunzionale, 87030 Arcavacata di Rende, Cosenza, Italy*

*\* Corresponding author e-mail: [andrea.temperini@unipg.it](mailto:andrea.temperini@unipg.it)*

Supporting Information

## Table of Contents

|                                               |           |           |
|-----------------------------------------------|-----------|-----------|
| <b>NMR Spectra of enones 8d, 8g and 8i</b>    | <b>SI</b> | <b>3</b>  |
| <b>NMR Spectra of ketones 3a, 4b-m</b>        | <b>SI</b> | <b>9</b>  |
| <b>NMR Spectra of Zingerone 7</b>             | <b>SI</b> | <b>30</b> |
| <b>NMR Spectra of ketones 9a-k</b>            | <b>SI</b> | <b>31</b> |
| <b>NMR Spectra of compounds 15, 16 and 17</b> | <b>SI</b> | <b>48</b> |

SI 3

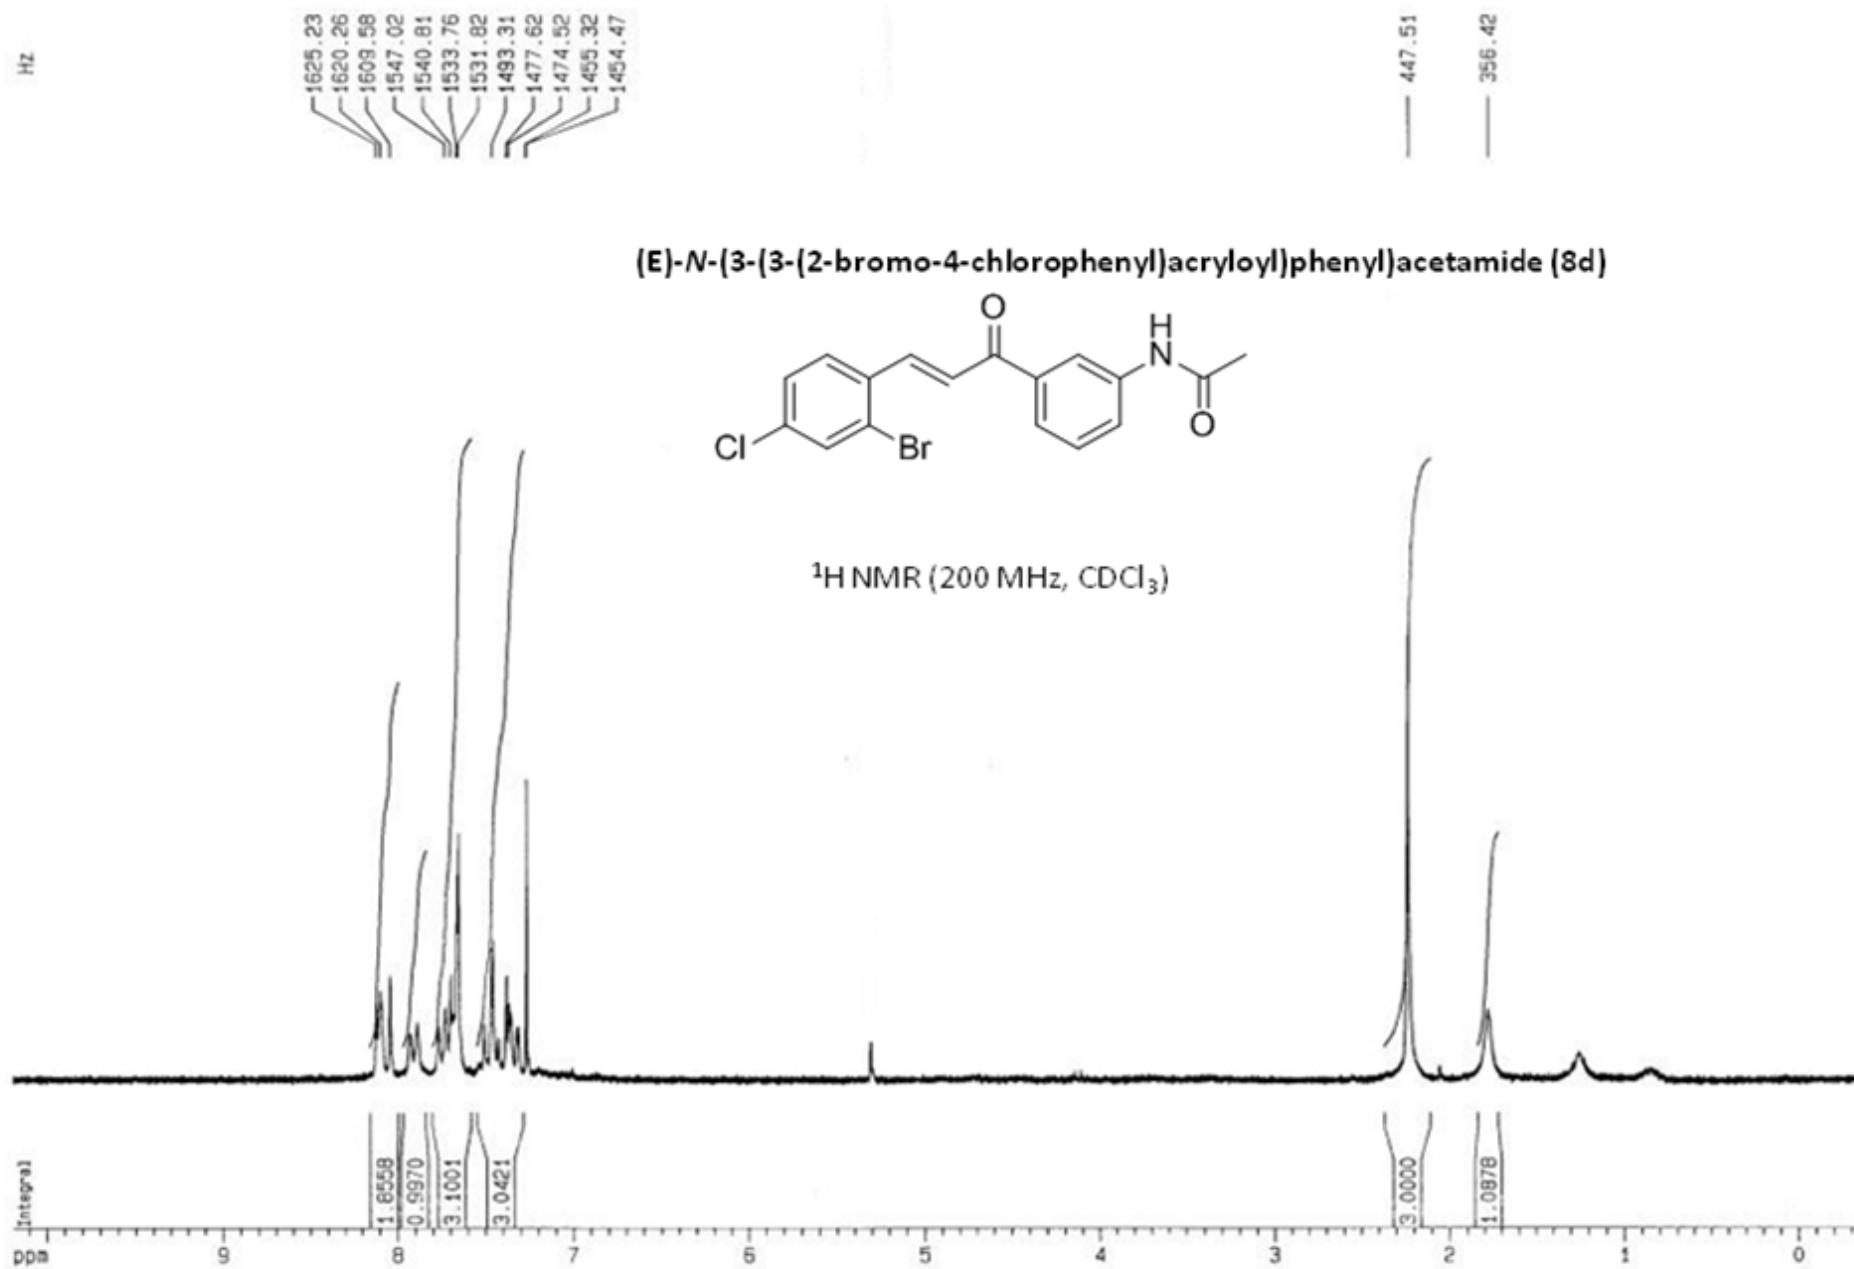

SI 4

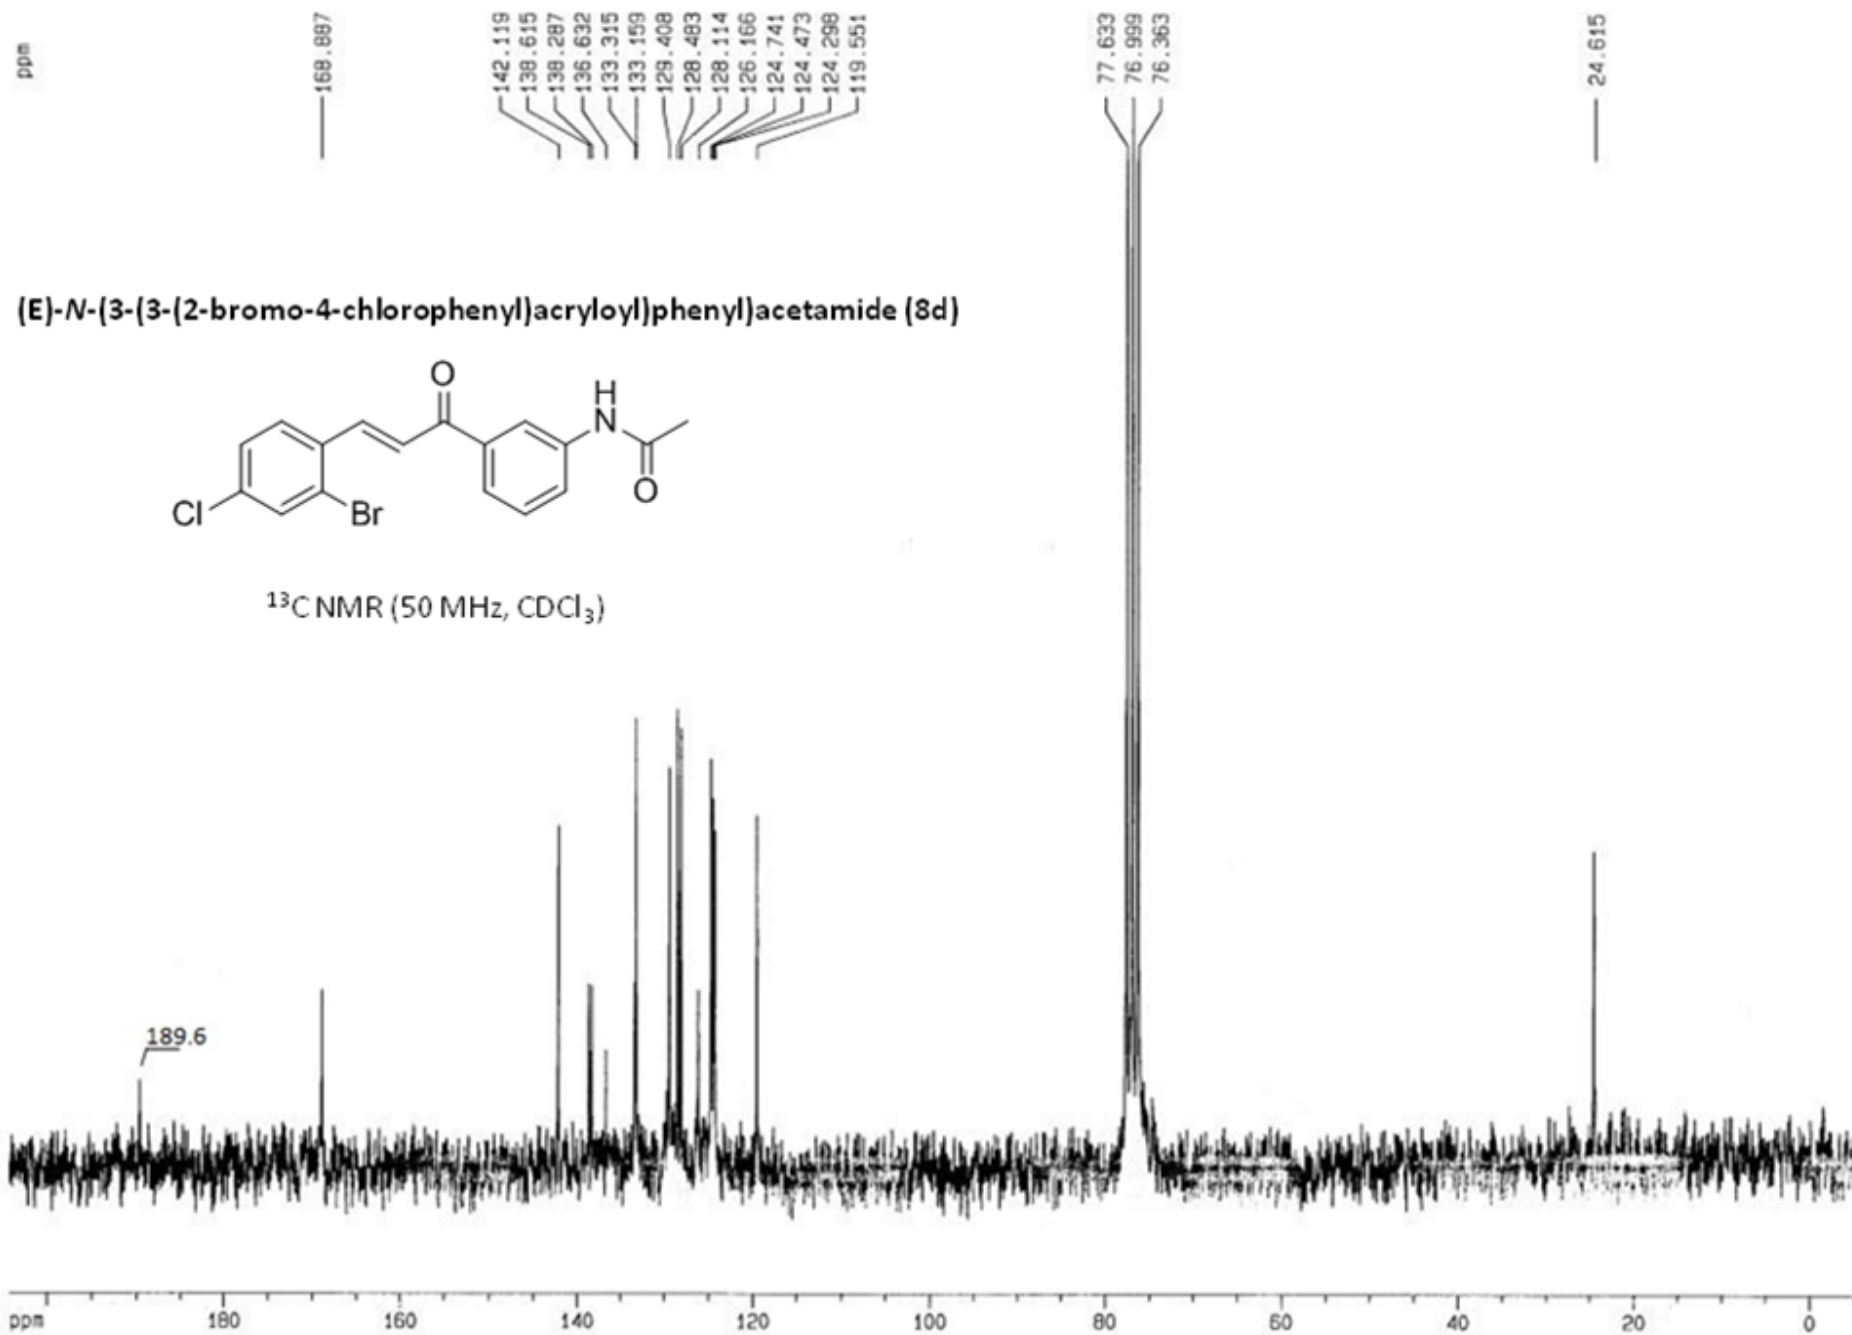

SI 5

ppm  
8.22696  
8.13375  
7.86624  
7.78806  
7.73064  
7.72619  
7.72034  
7.69627  
7.69103  
7.66629  
7.66265  
7.46233  
7.44200  
7.42905  
7.36957  
7.29005  
7.26780  
7.21175

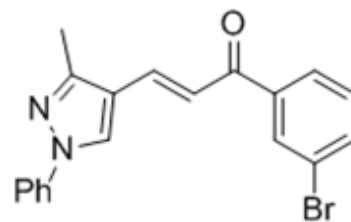

2.53559

**(E)-1-(3-bromophenyl)-3-(3-methyl-1-phenyl-1H-pyrazol-4-yl)prop-2-en-1-one (8g)**

$^1\text{H NMR}$  (200 MHz,  $\text{CDCl}_3$ )

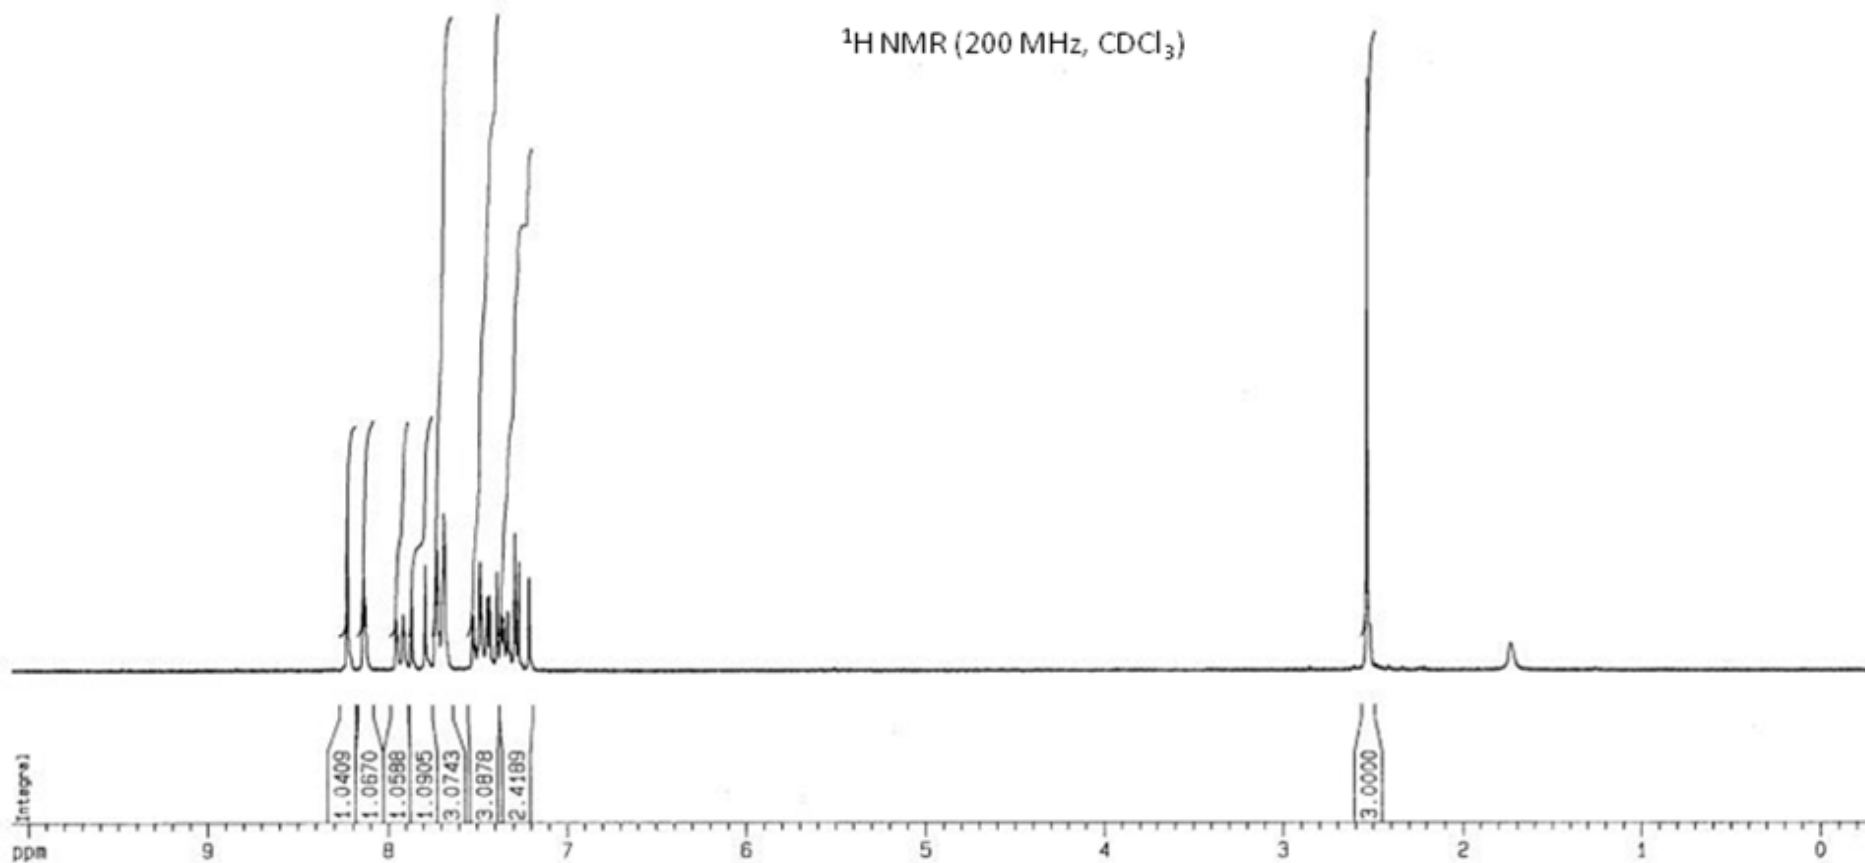

SI 6

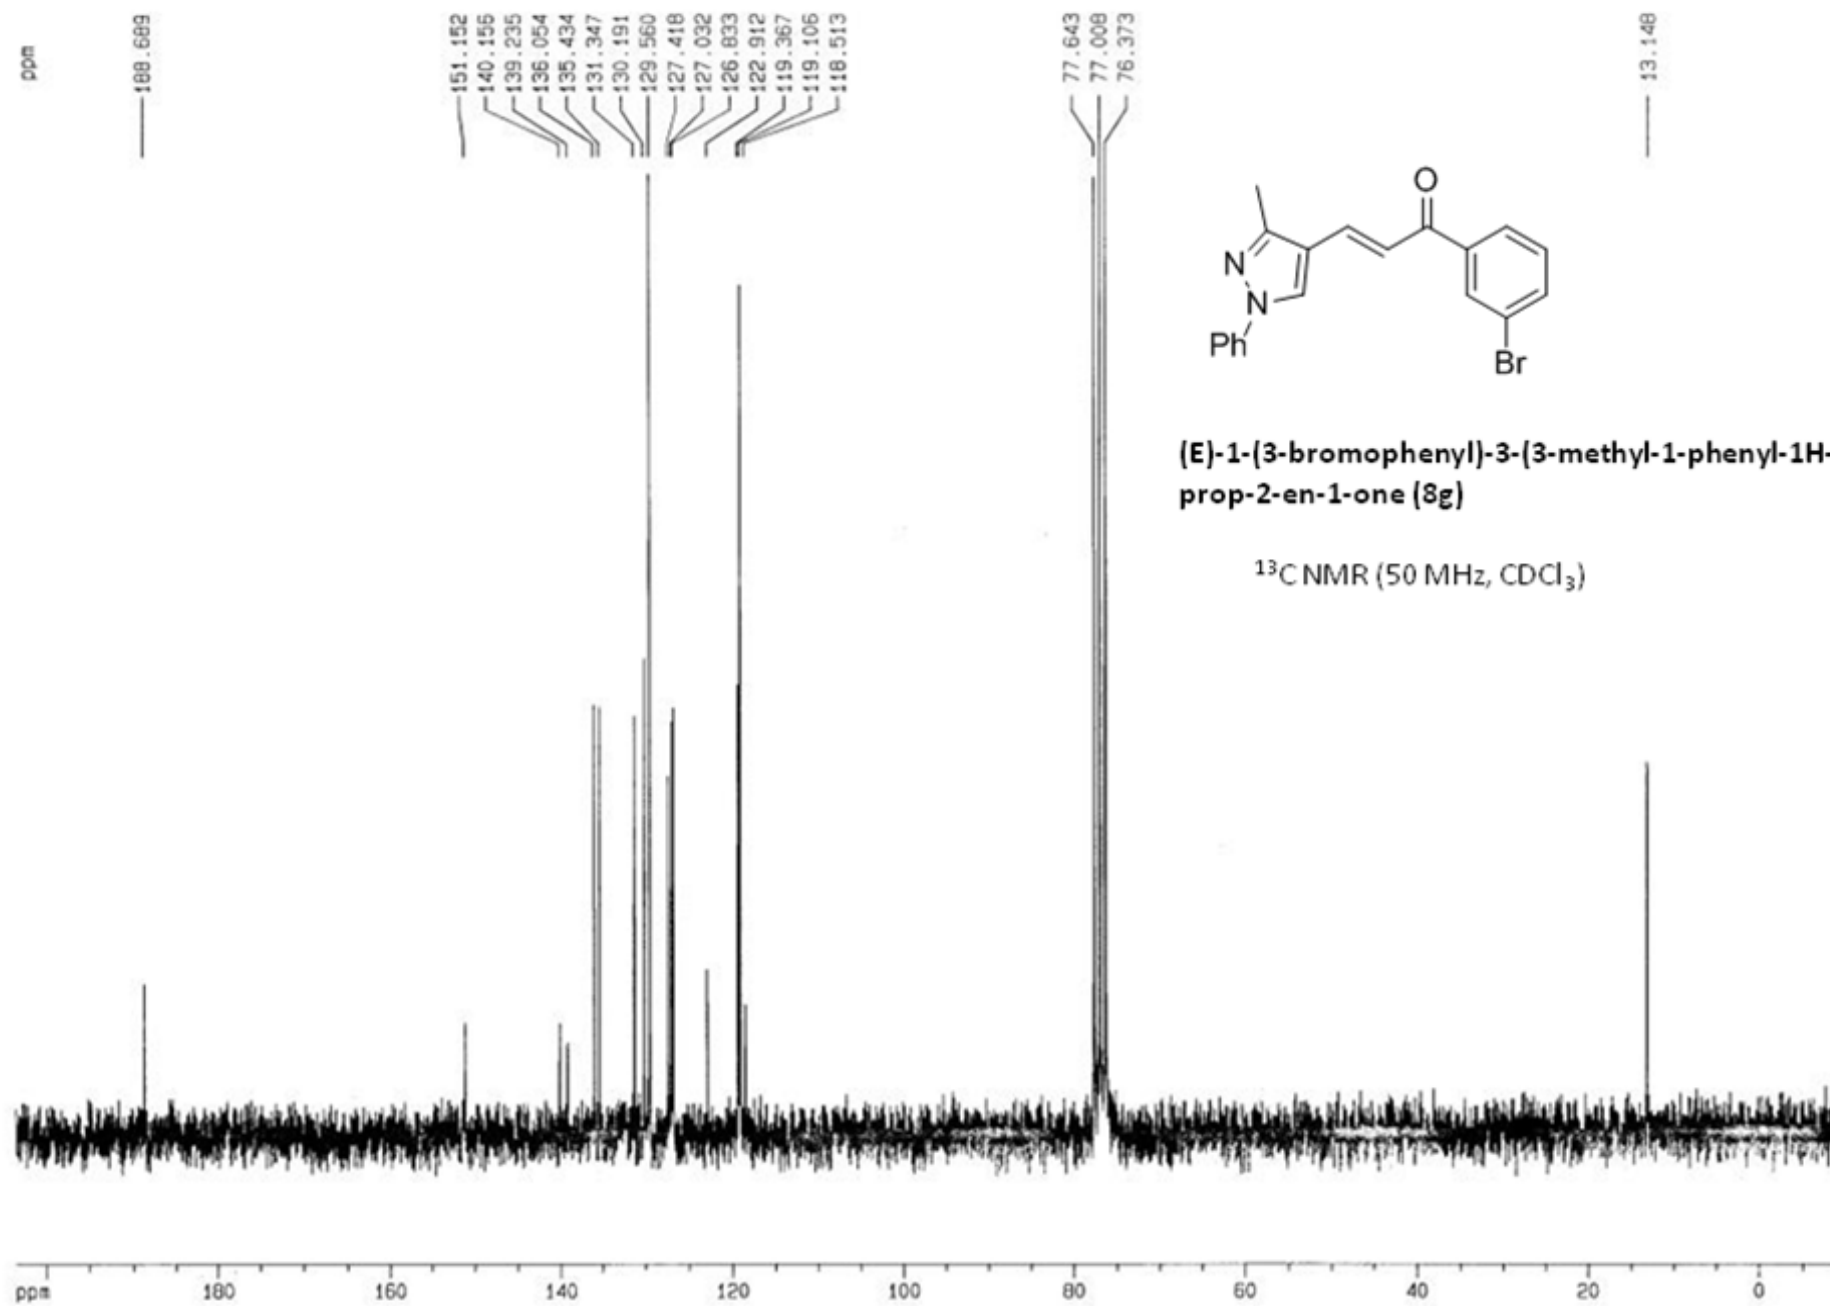

SI 7

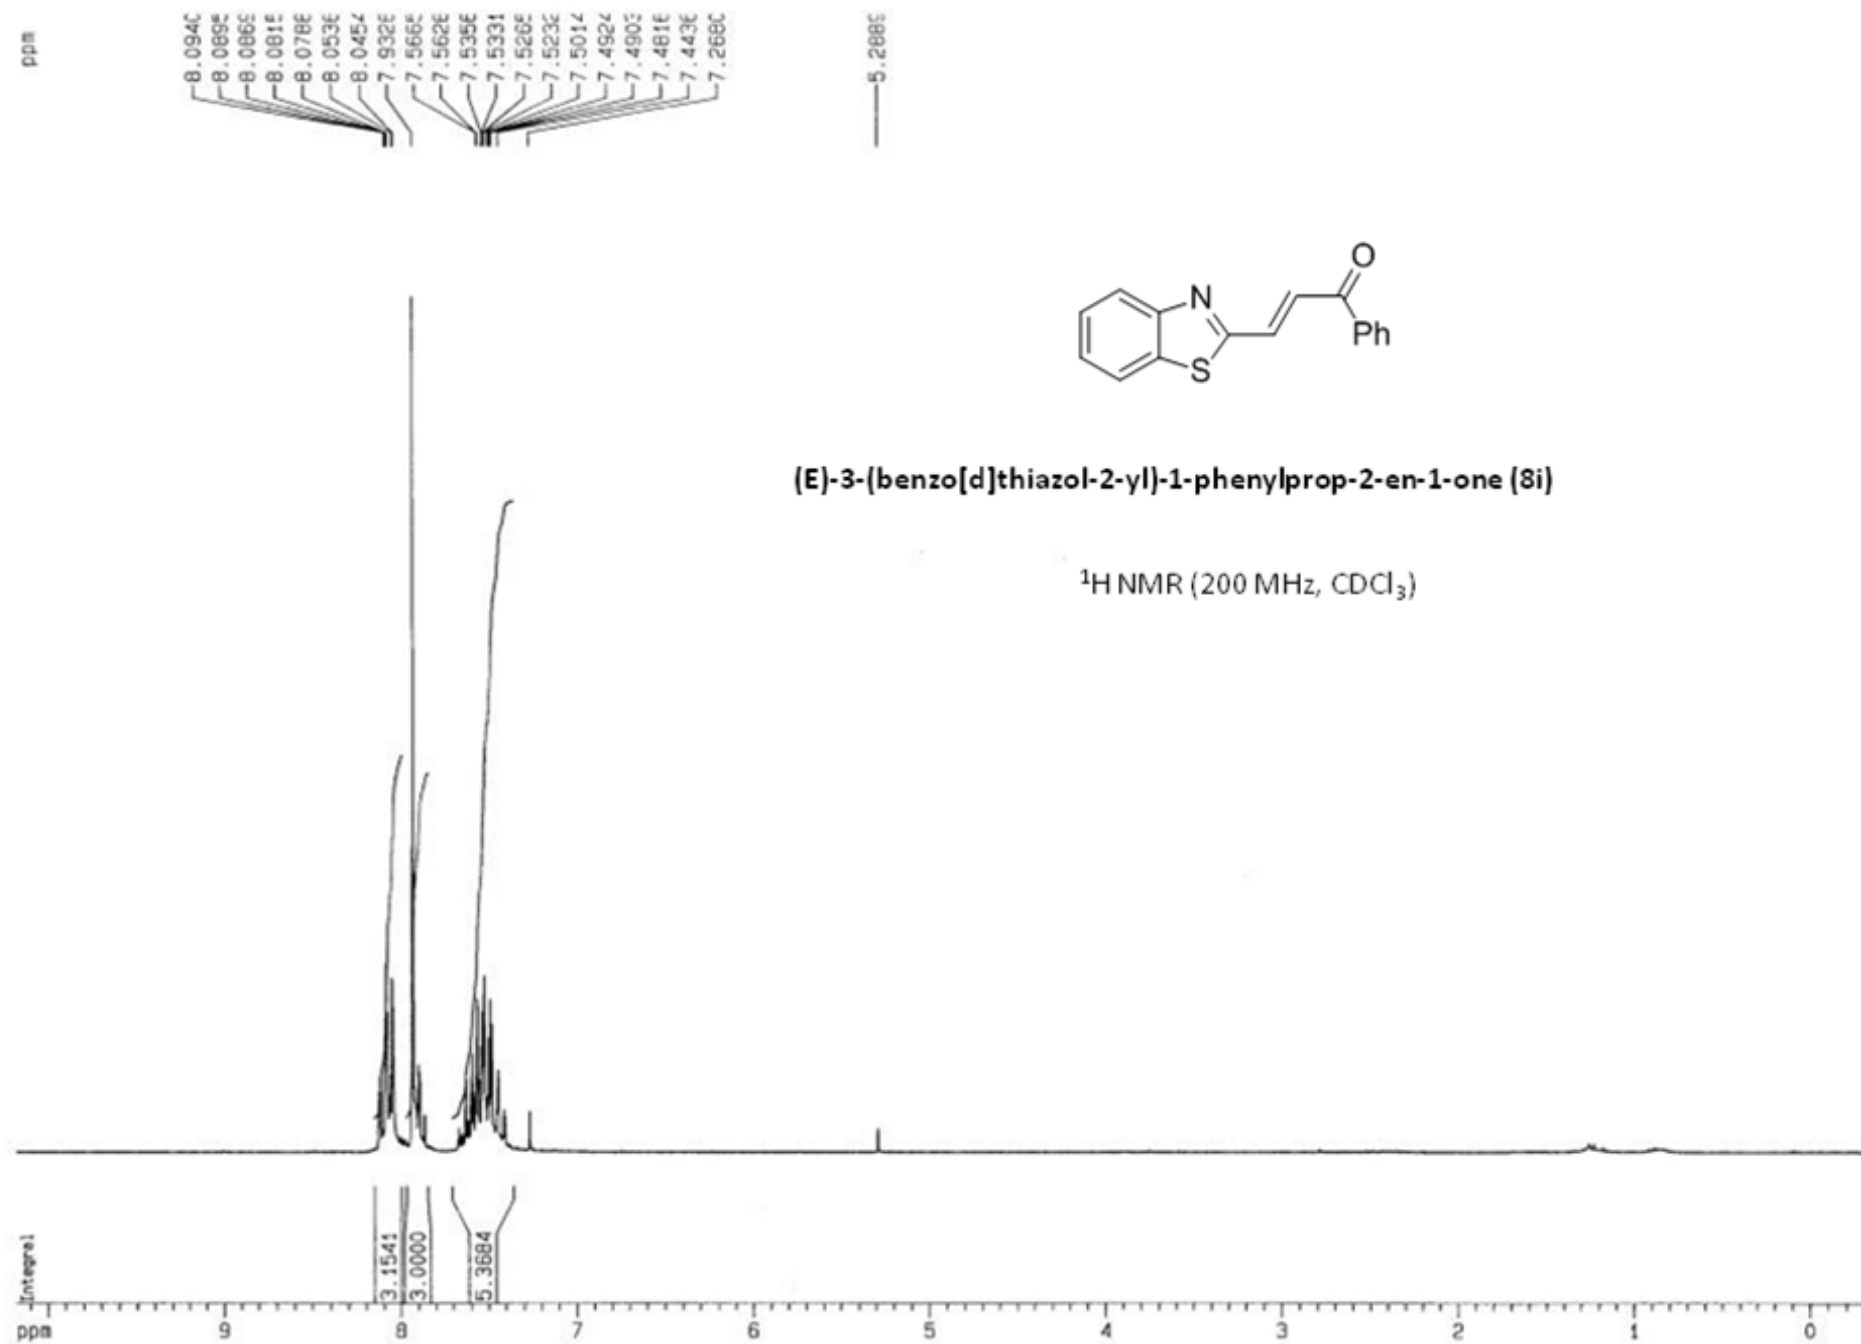

SI 8

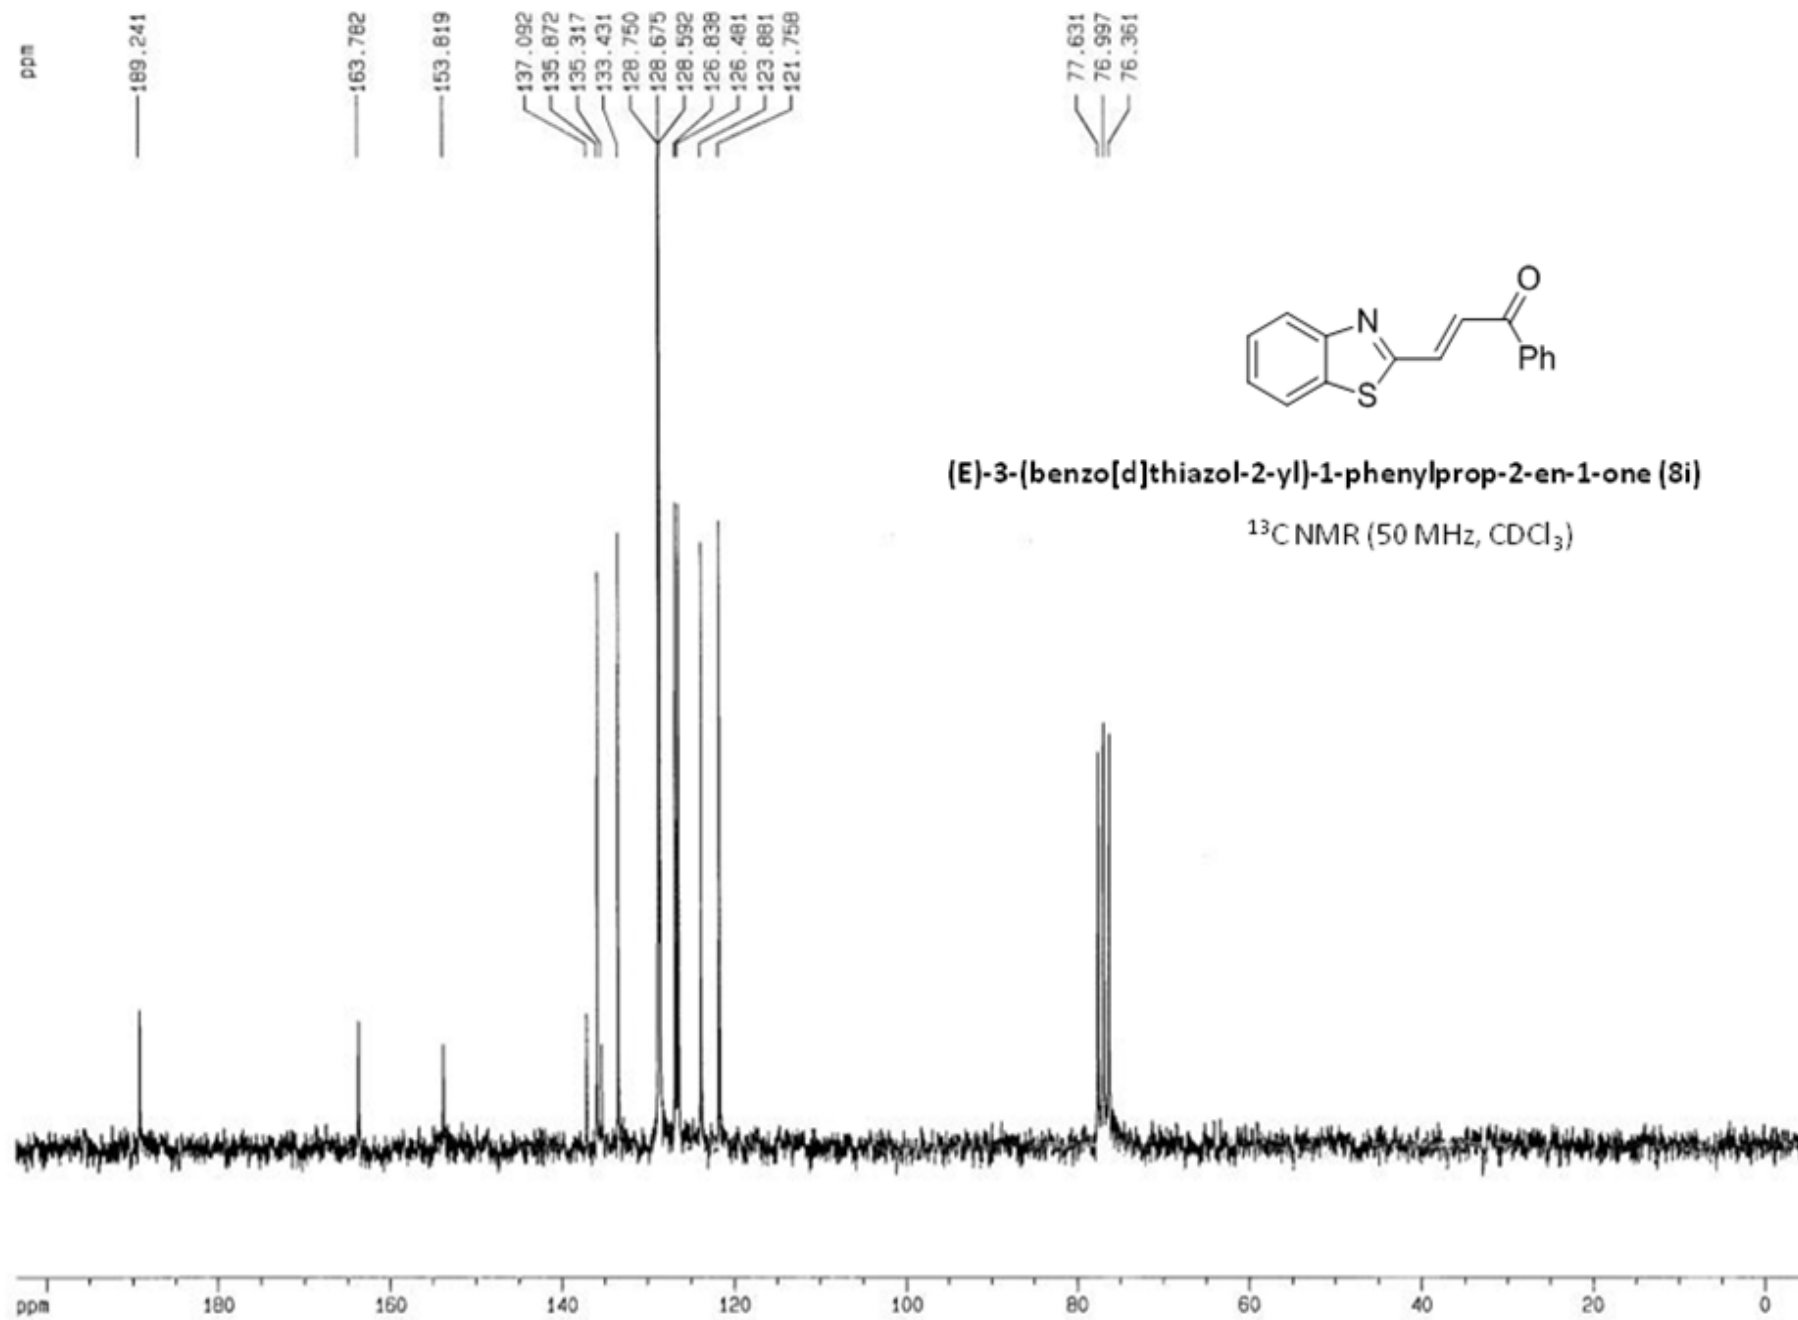



SI 9

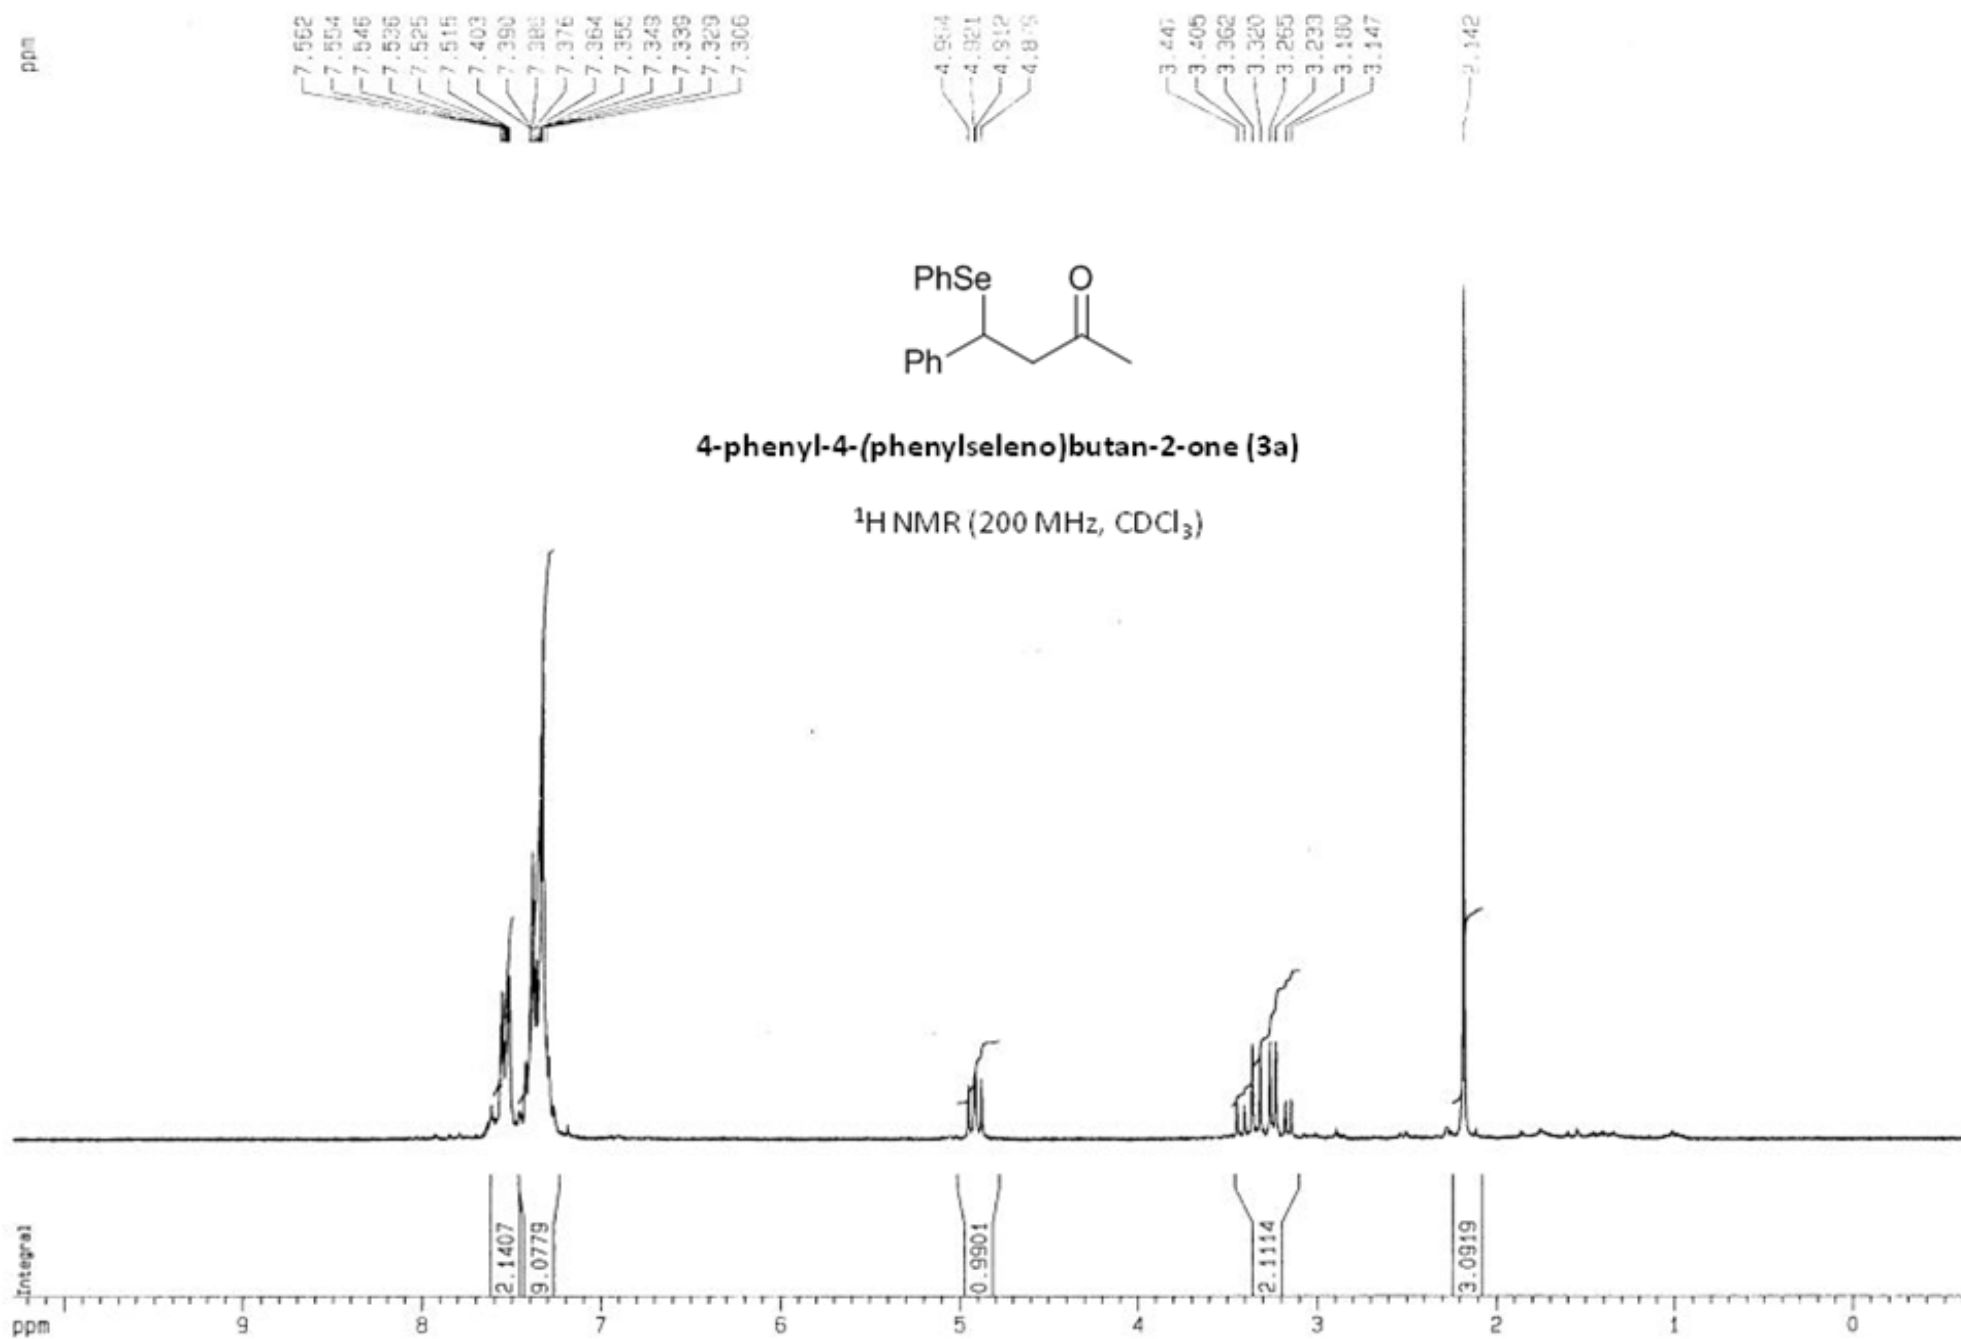

SI 10

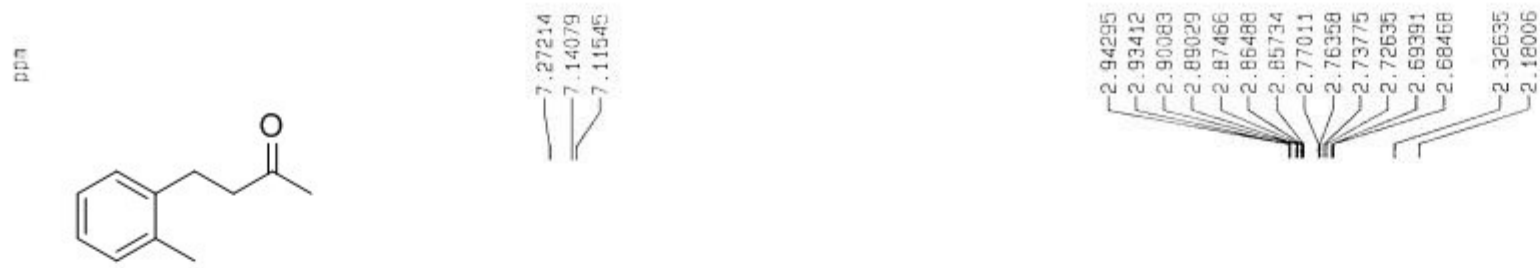

**4-(2-methylphenyl)butan-2-one (4b)**

$^1\text{H}$  NMR (200 MHz,  $\text{CDCl}_3$ )

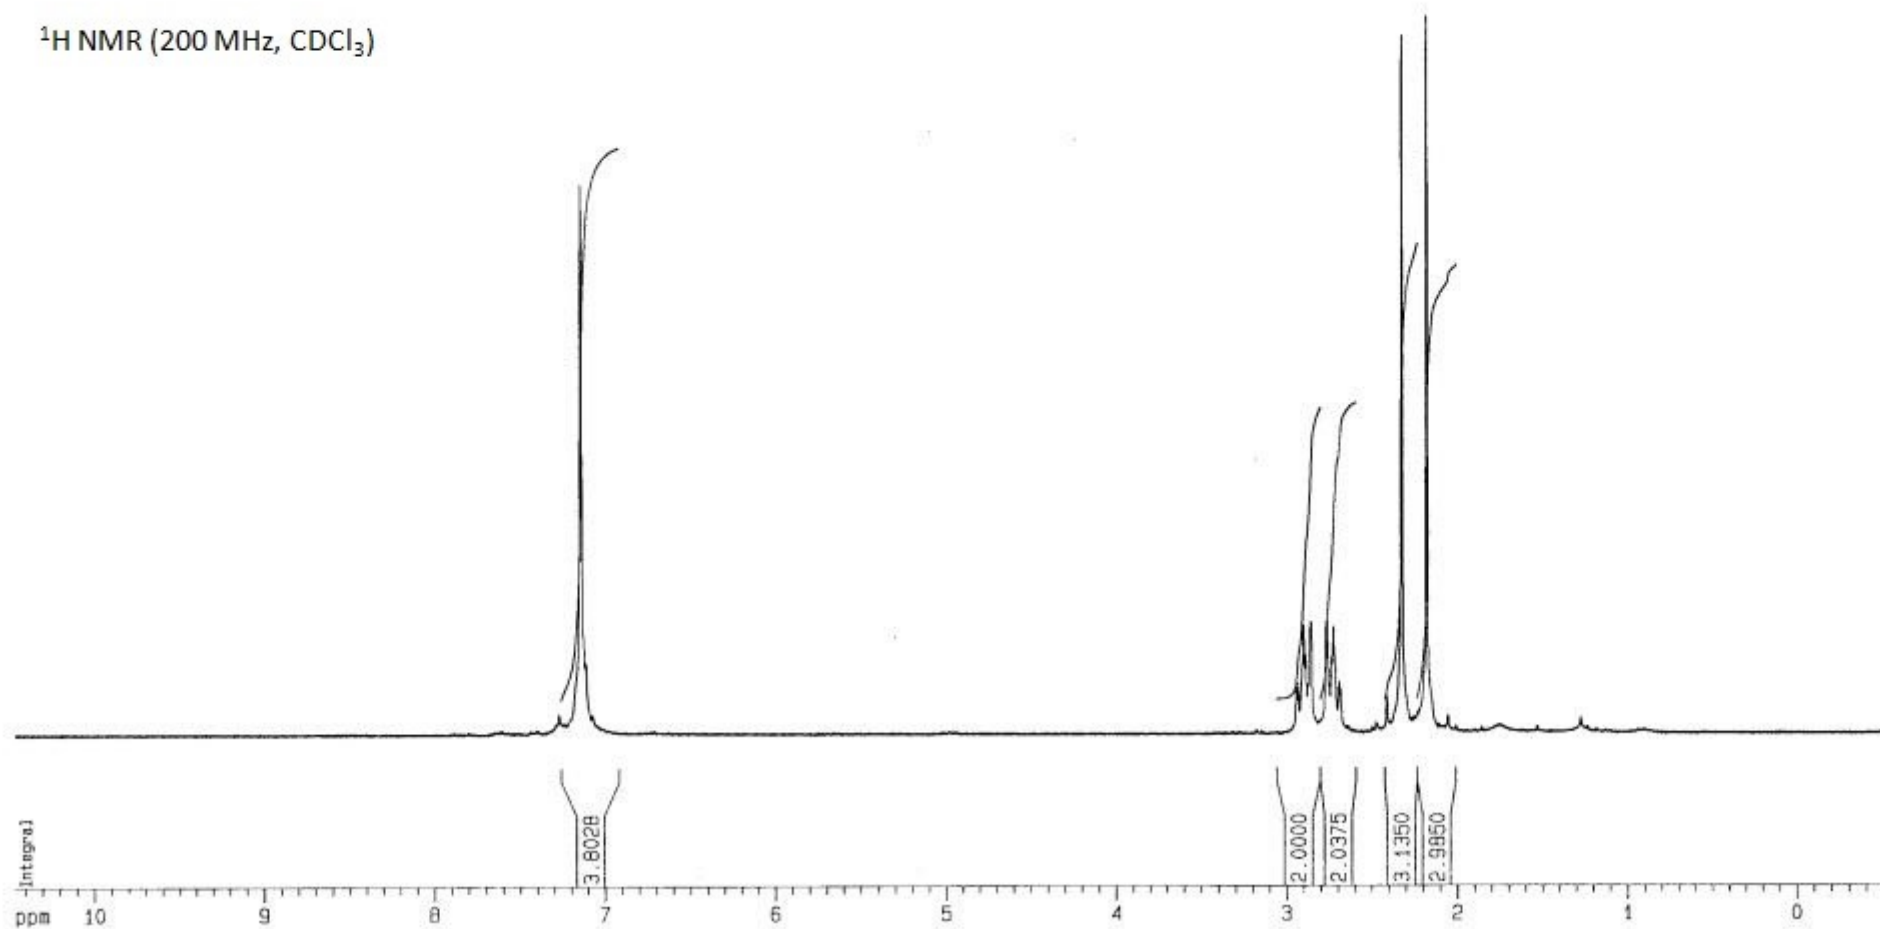

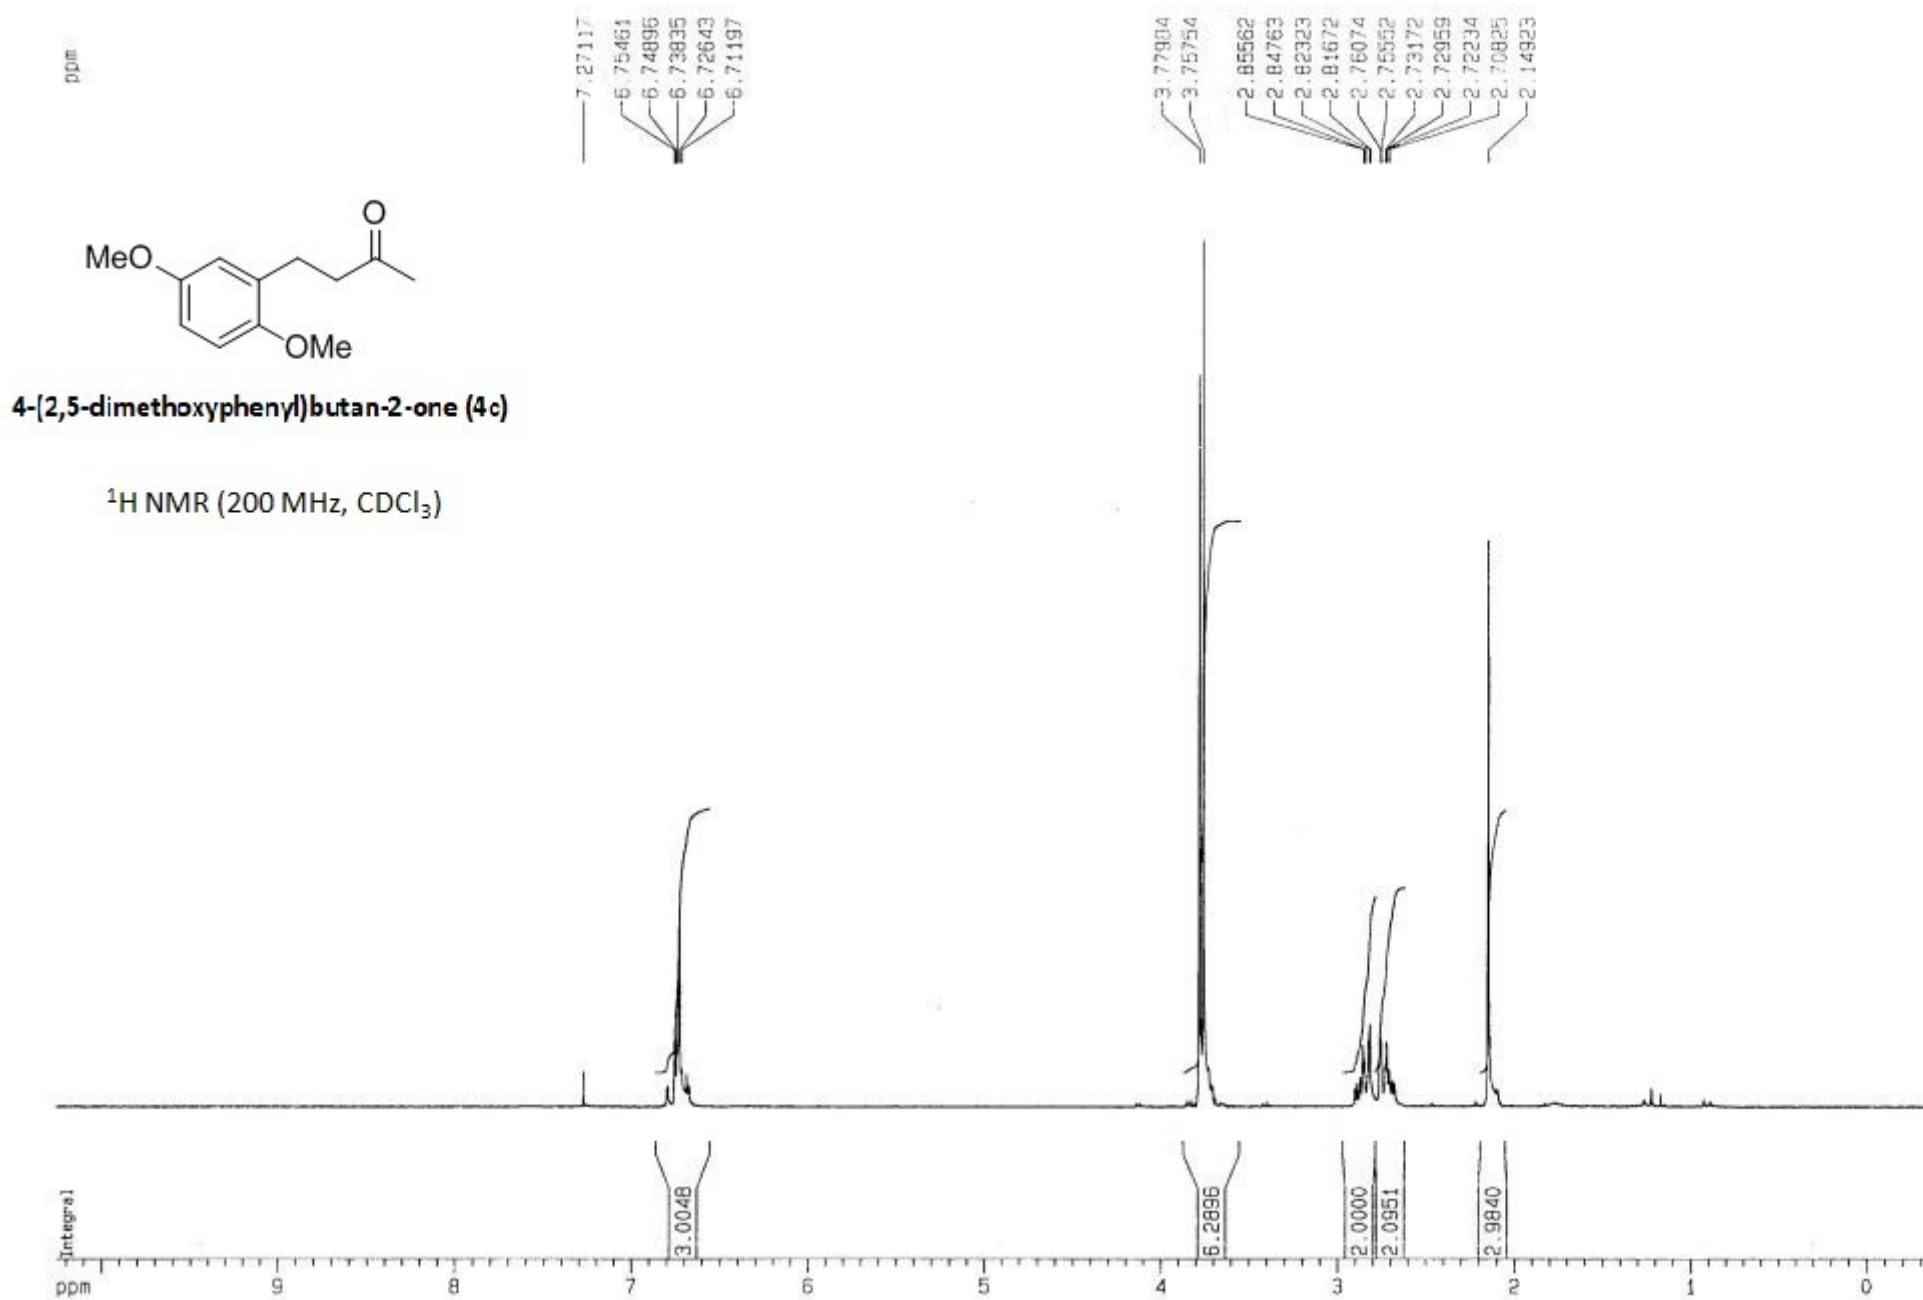

## SI 12

ppm  
208.590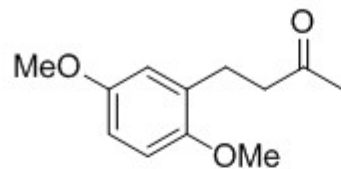153.319  
151.592

130.383

116.270  
111.201  
110.99777.634  
76.999  
76.36555.695  
55.597

43.623

29.673  
25.064

4-(2,5-dimethoxyphenyl)butan-2-one (4c)

 $^{13}\text{C}$  NMR (50 MHz,  $\text{CDCl}_3$ )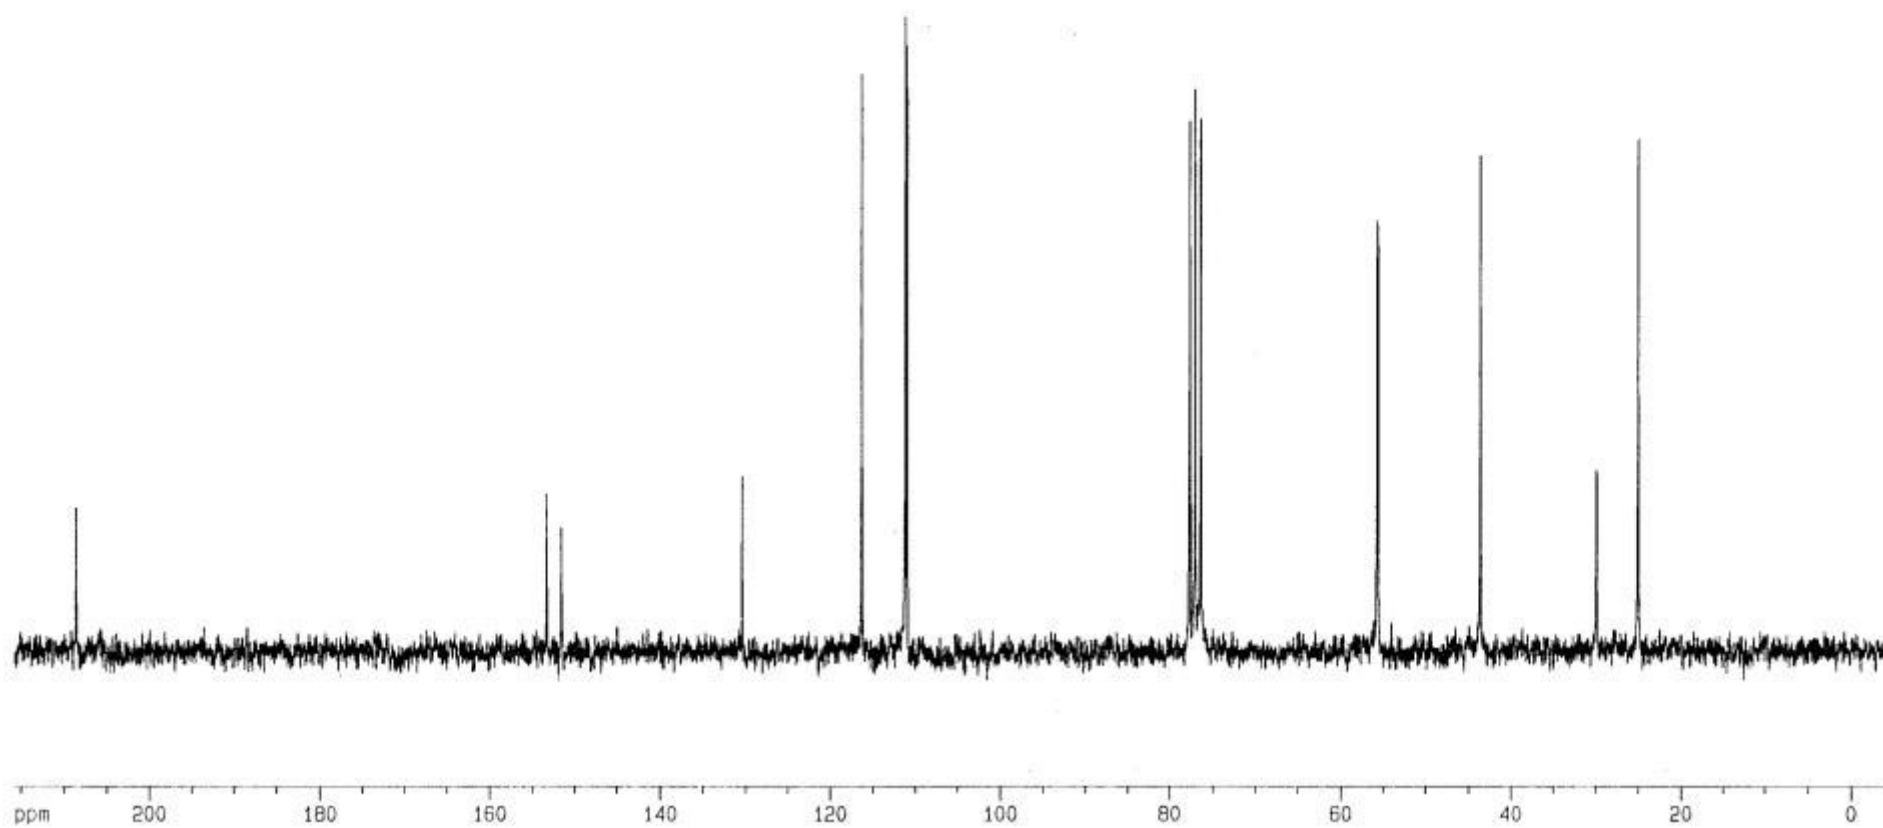

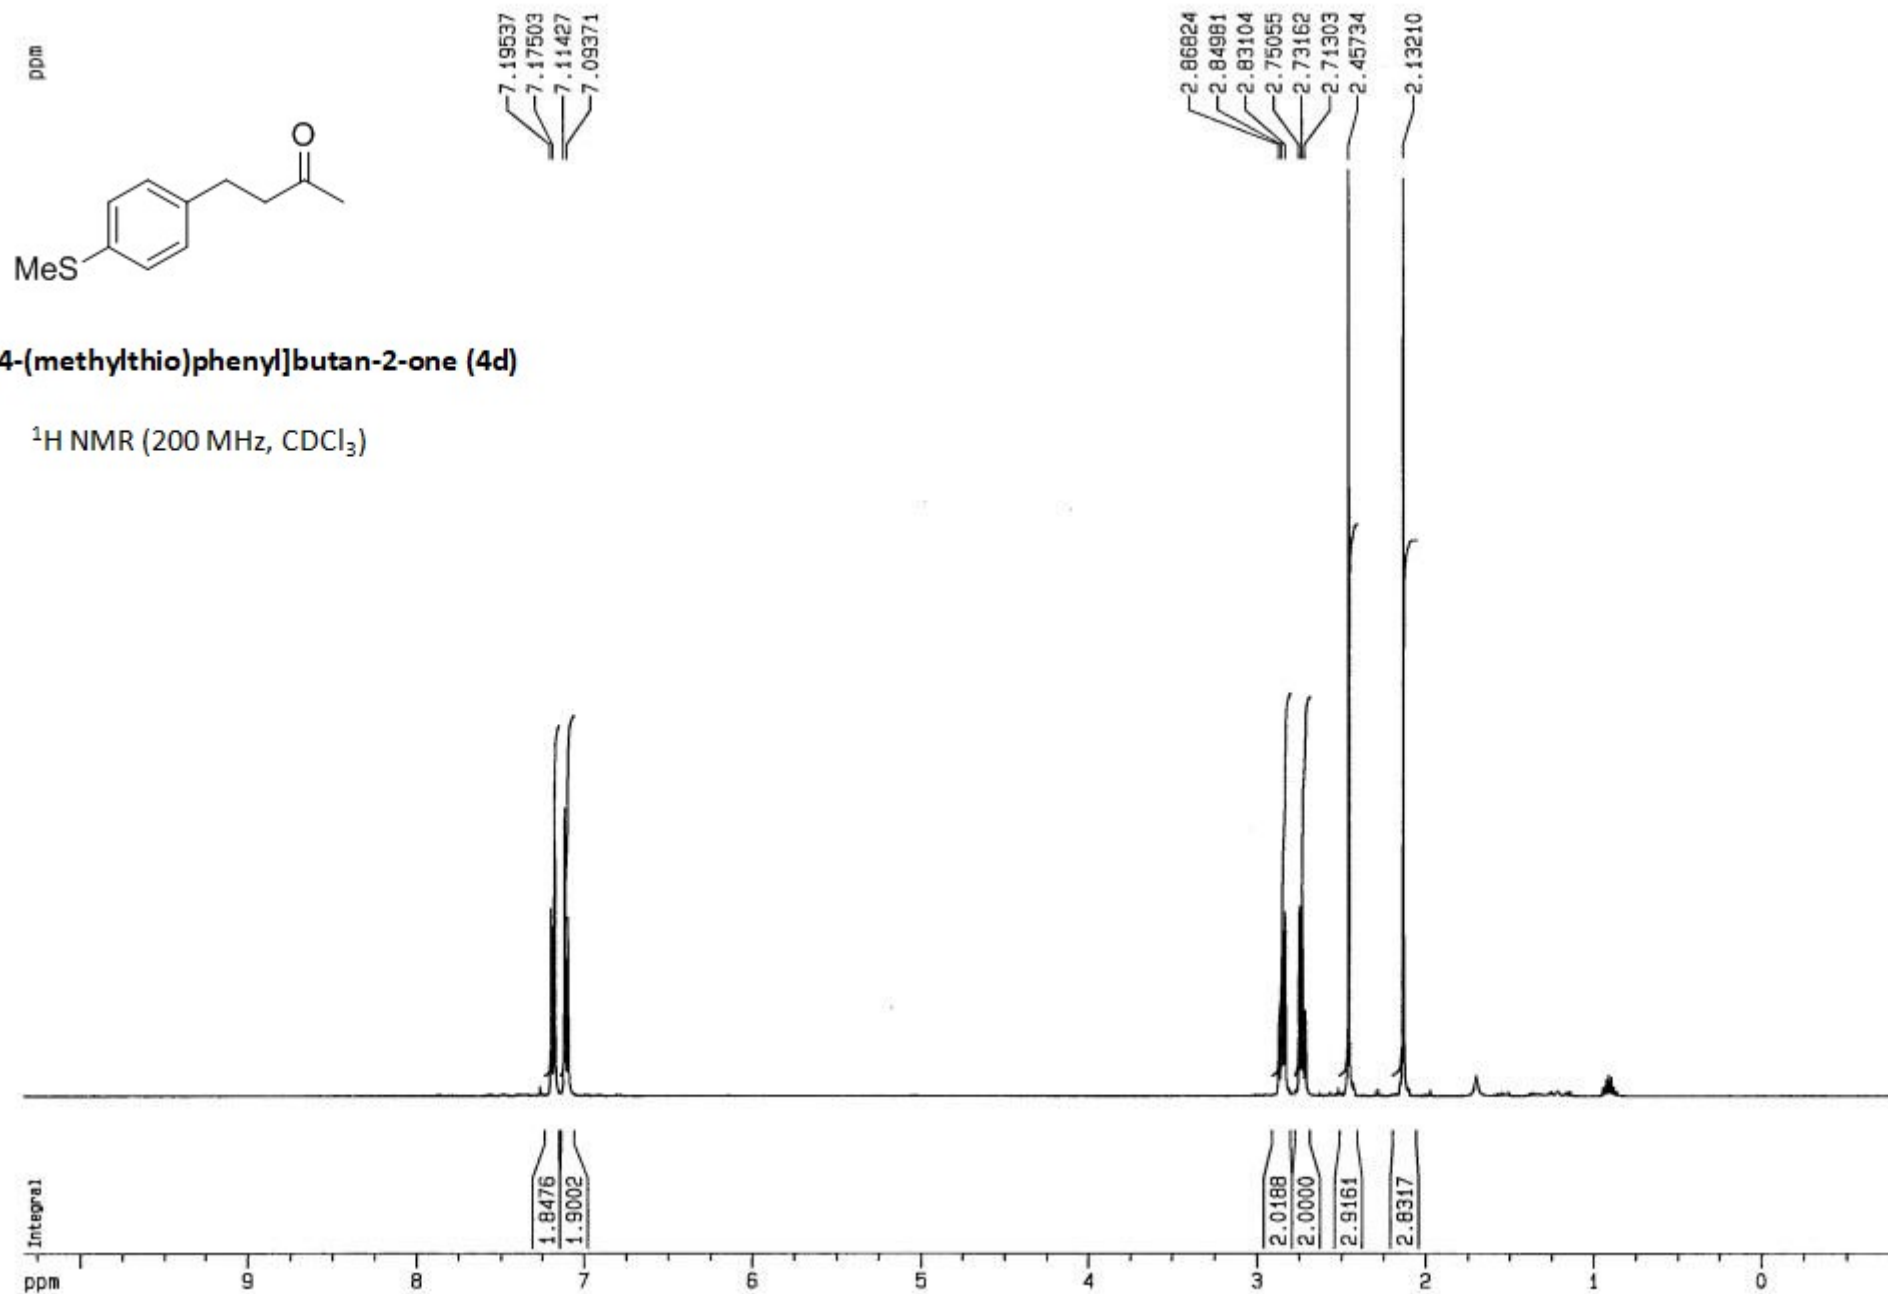

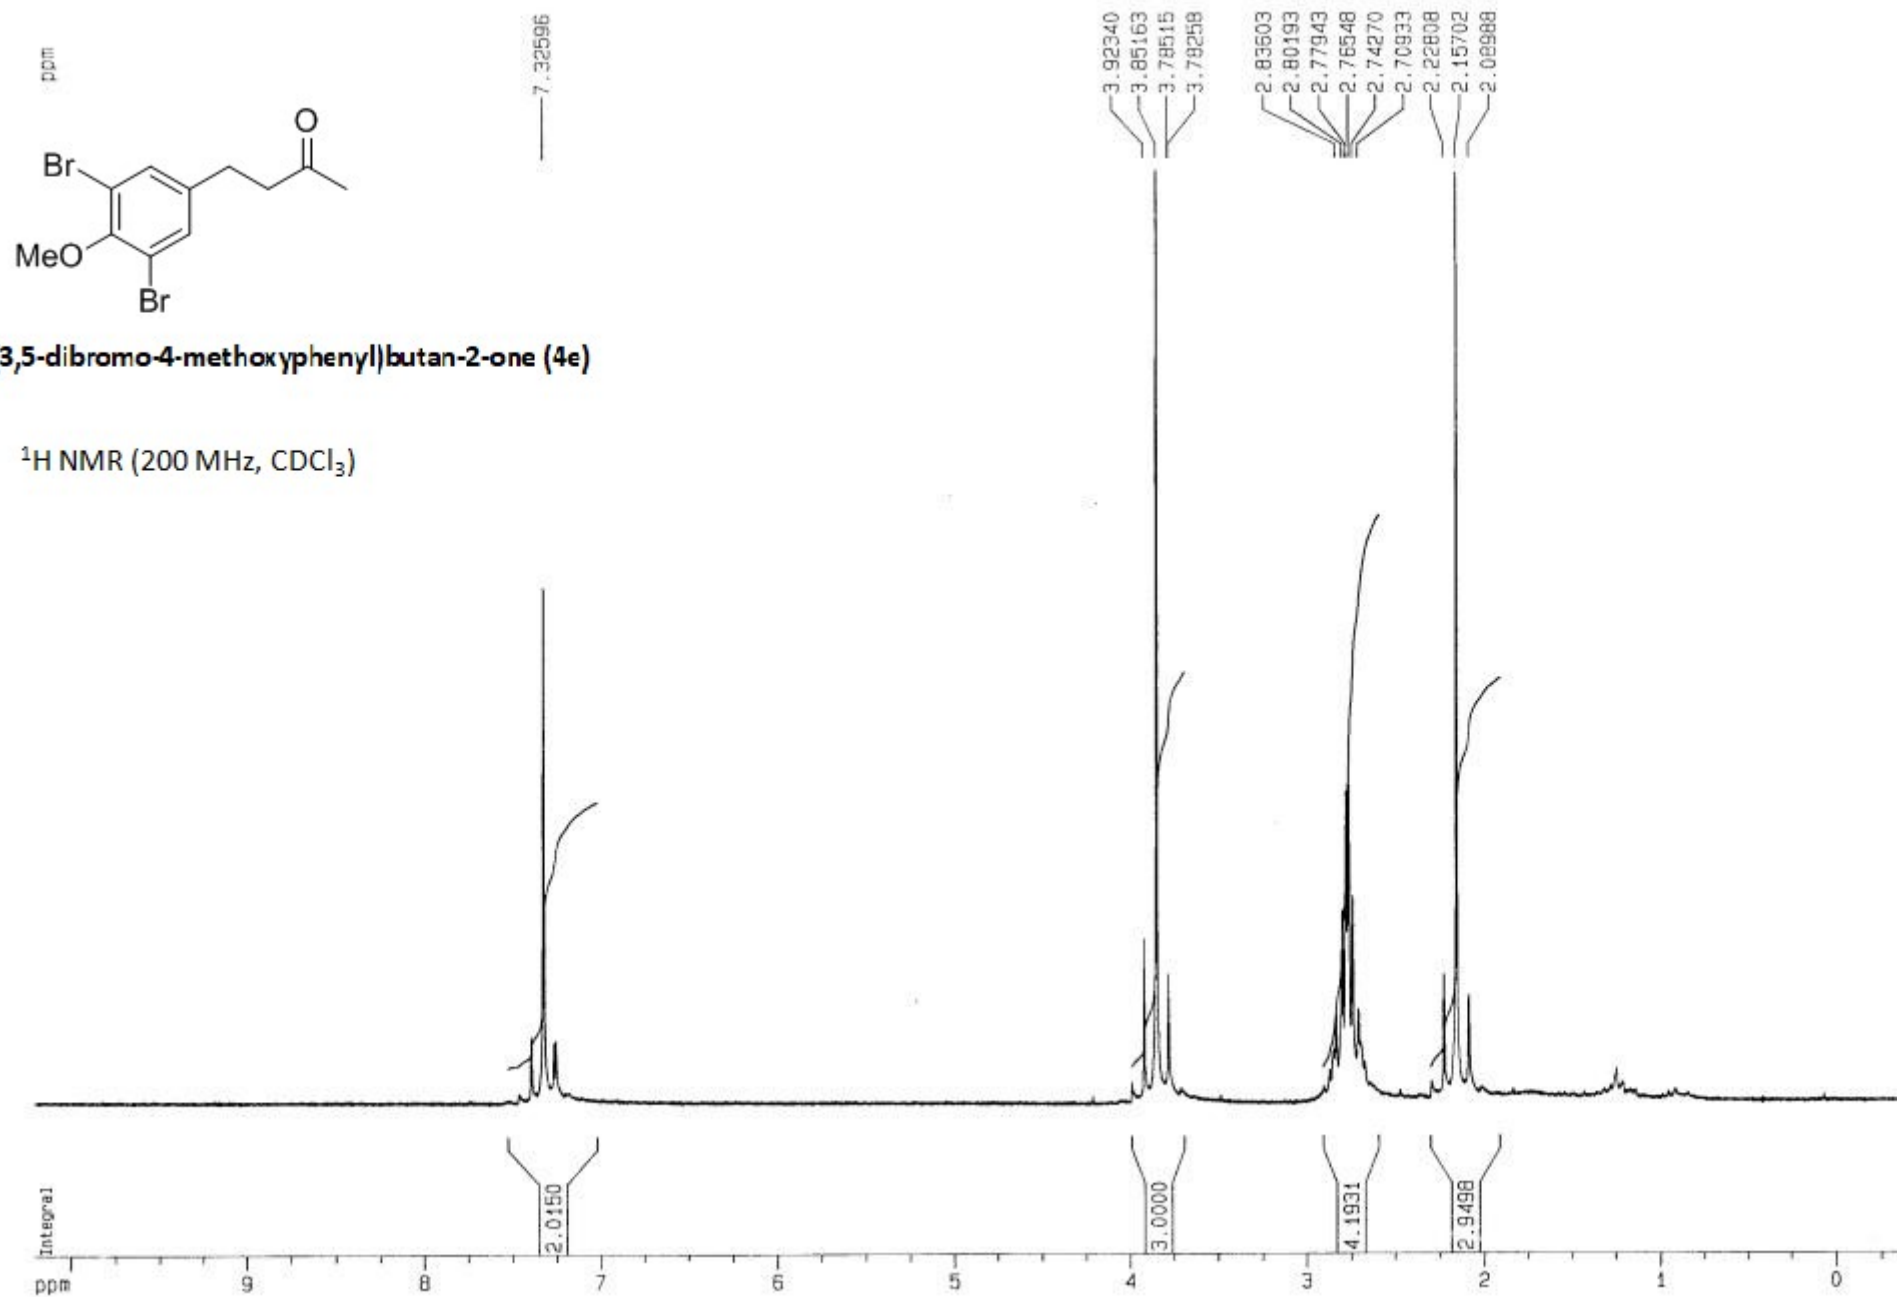

SI 15

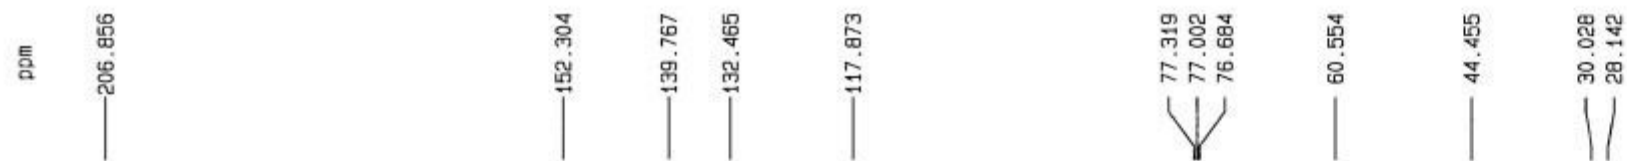

4-(3,5-dibromo-4-methoxyphenyl)butan-2-one (4e)

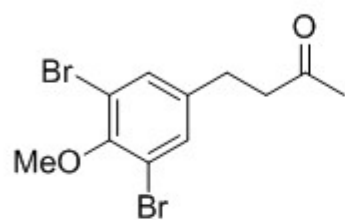

$^{13}\text{C}$  NMR (100 MHz,  $\text{CDCl}_3$ )

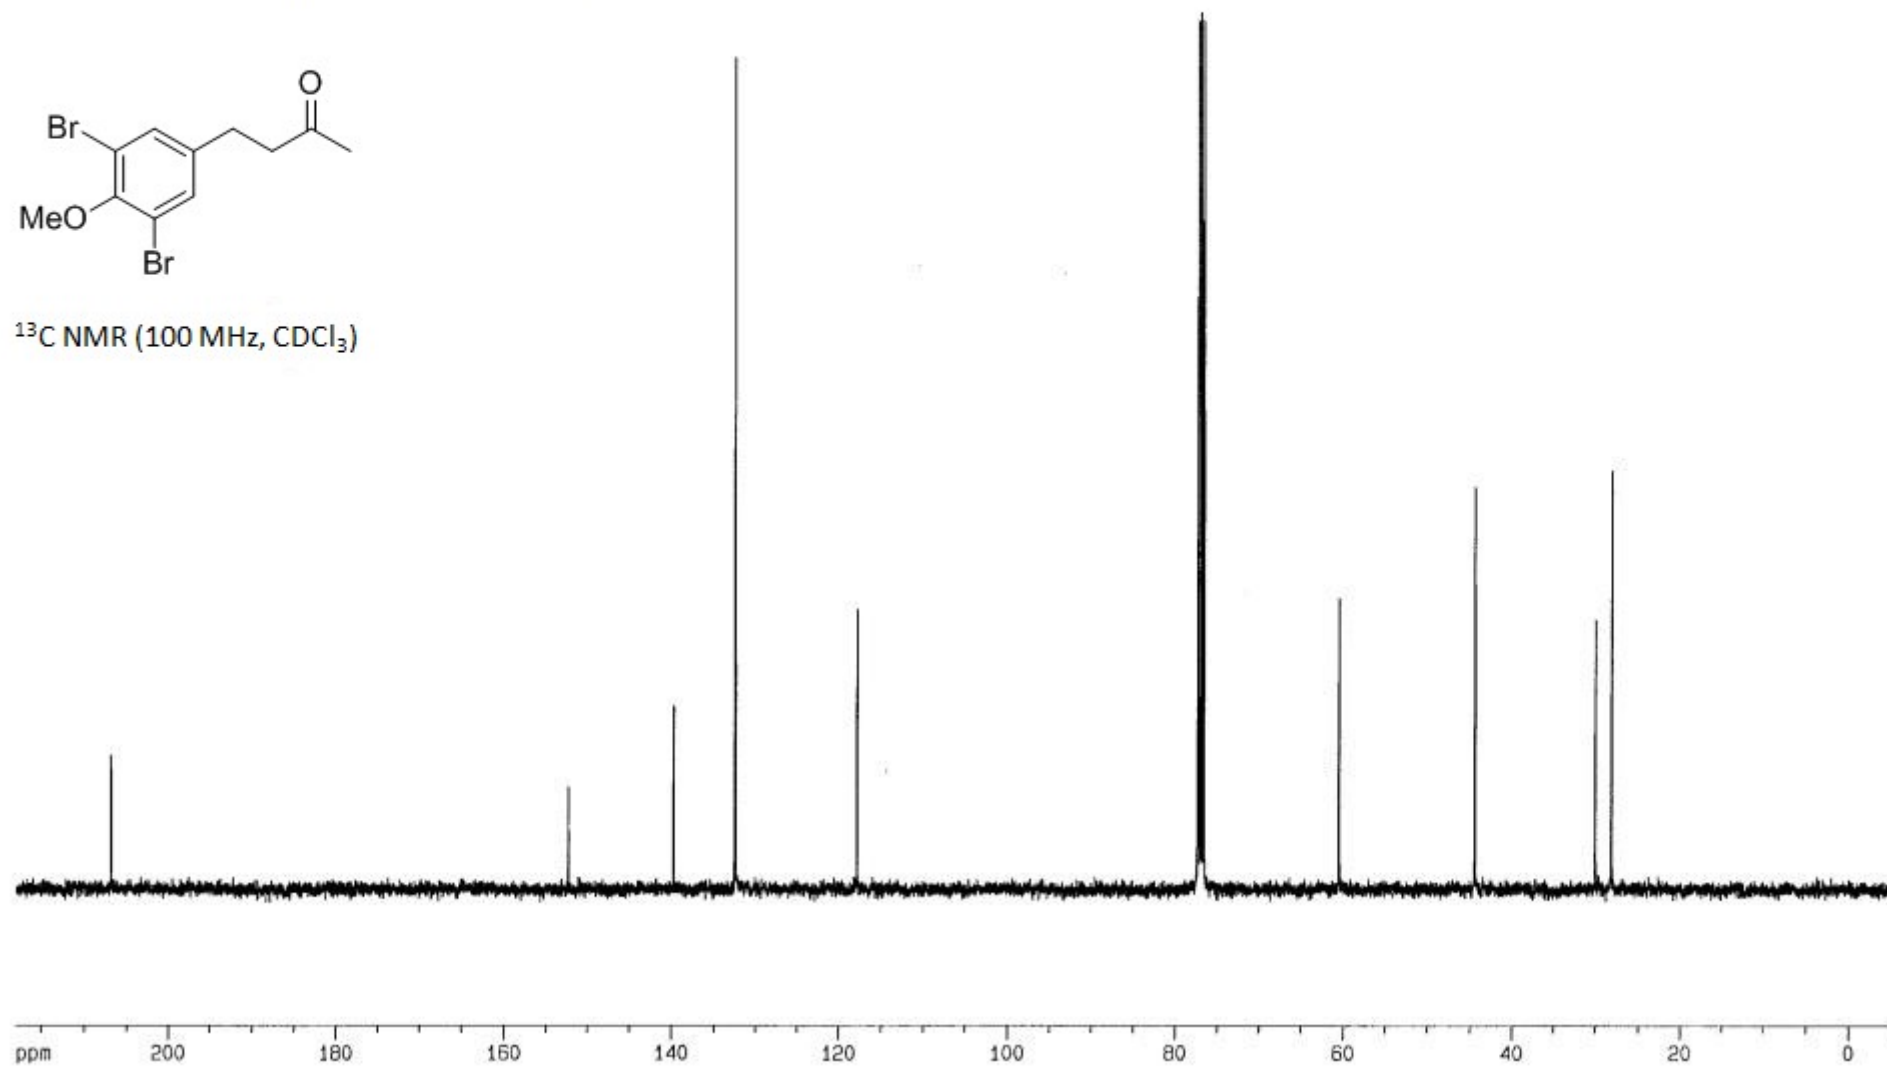

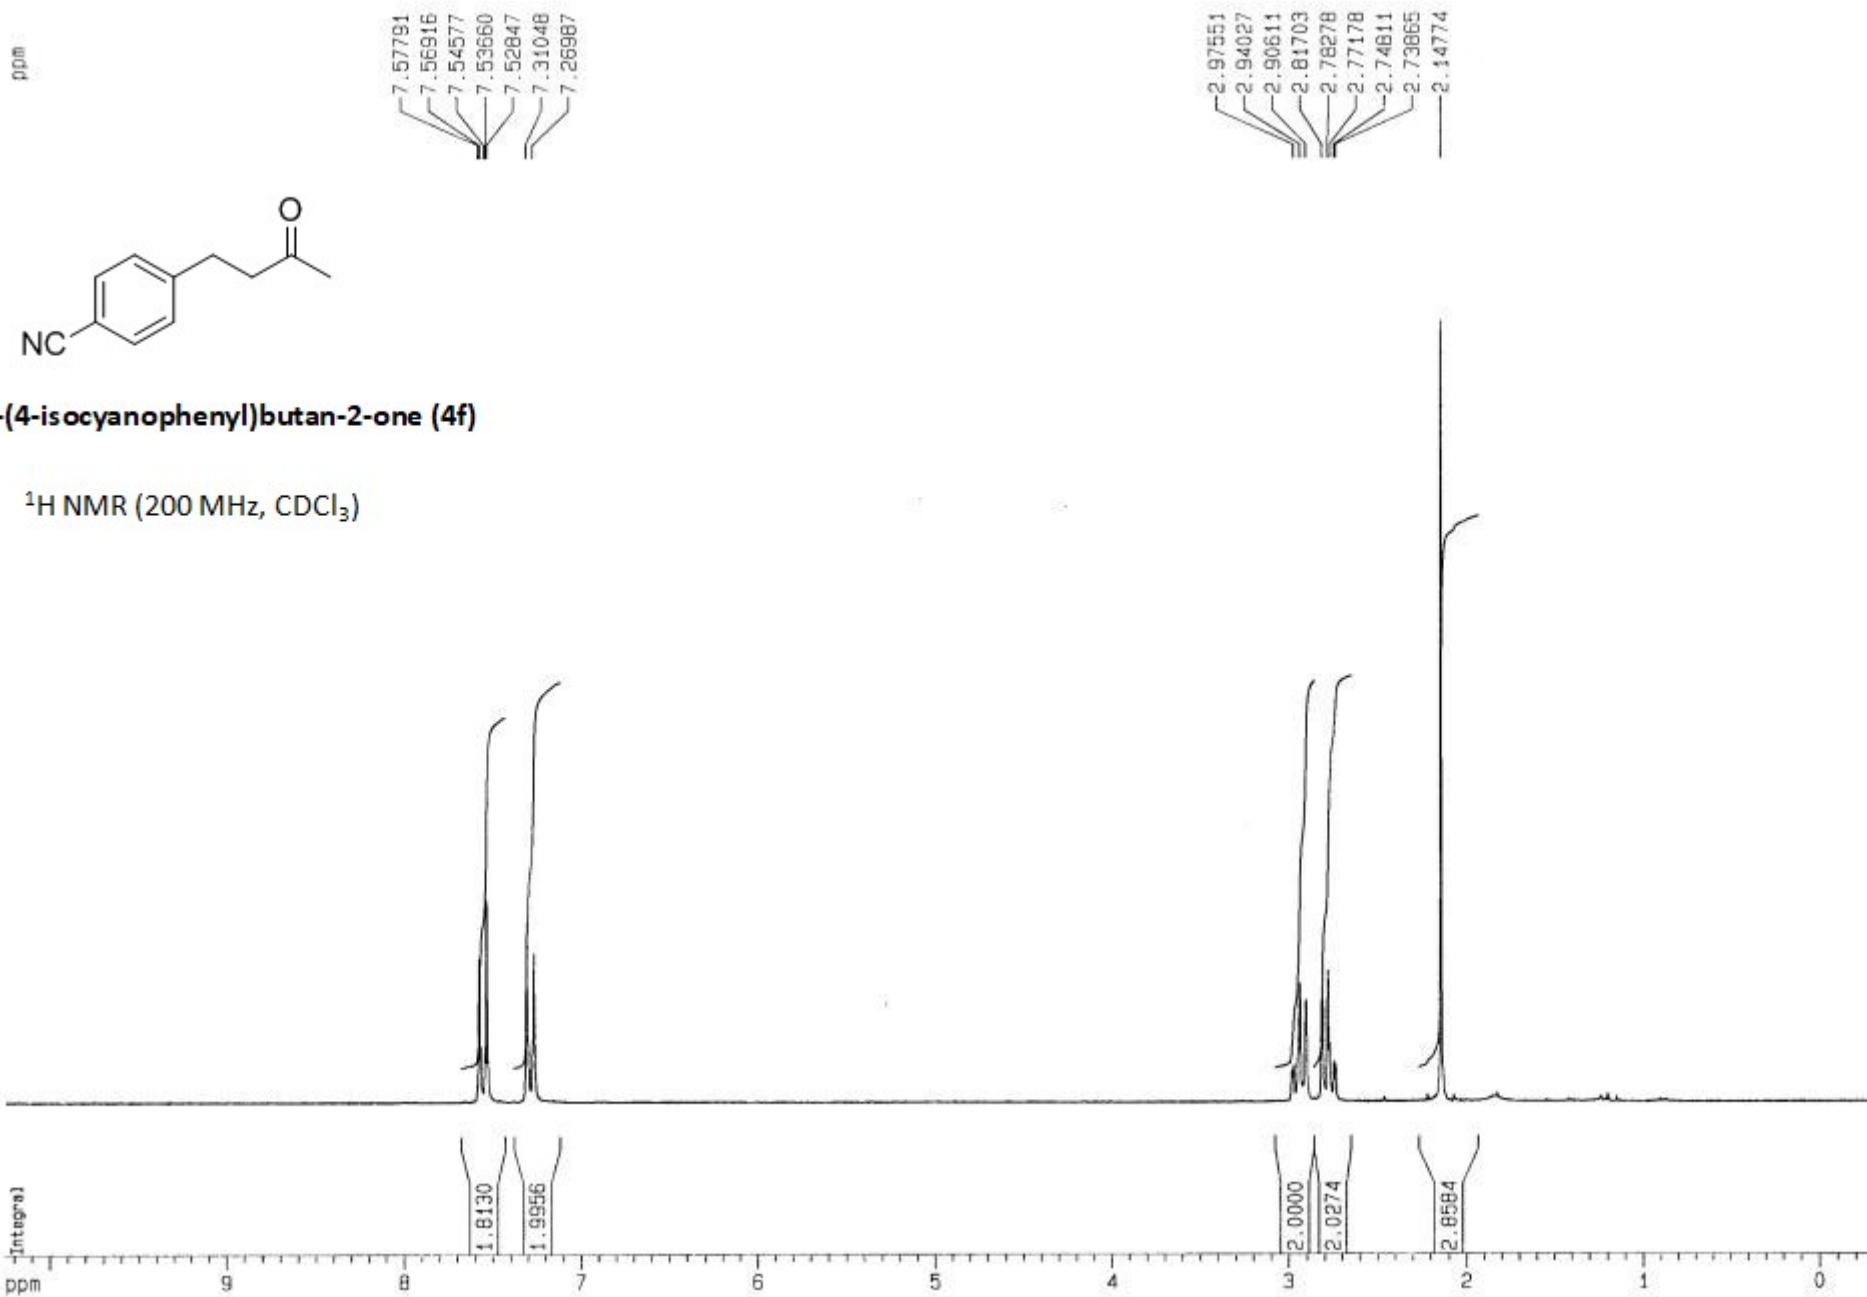



SI 17

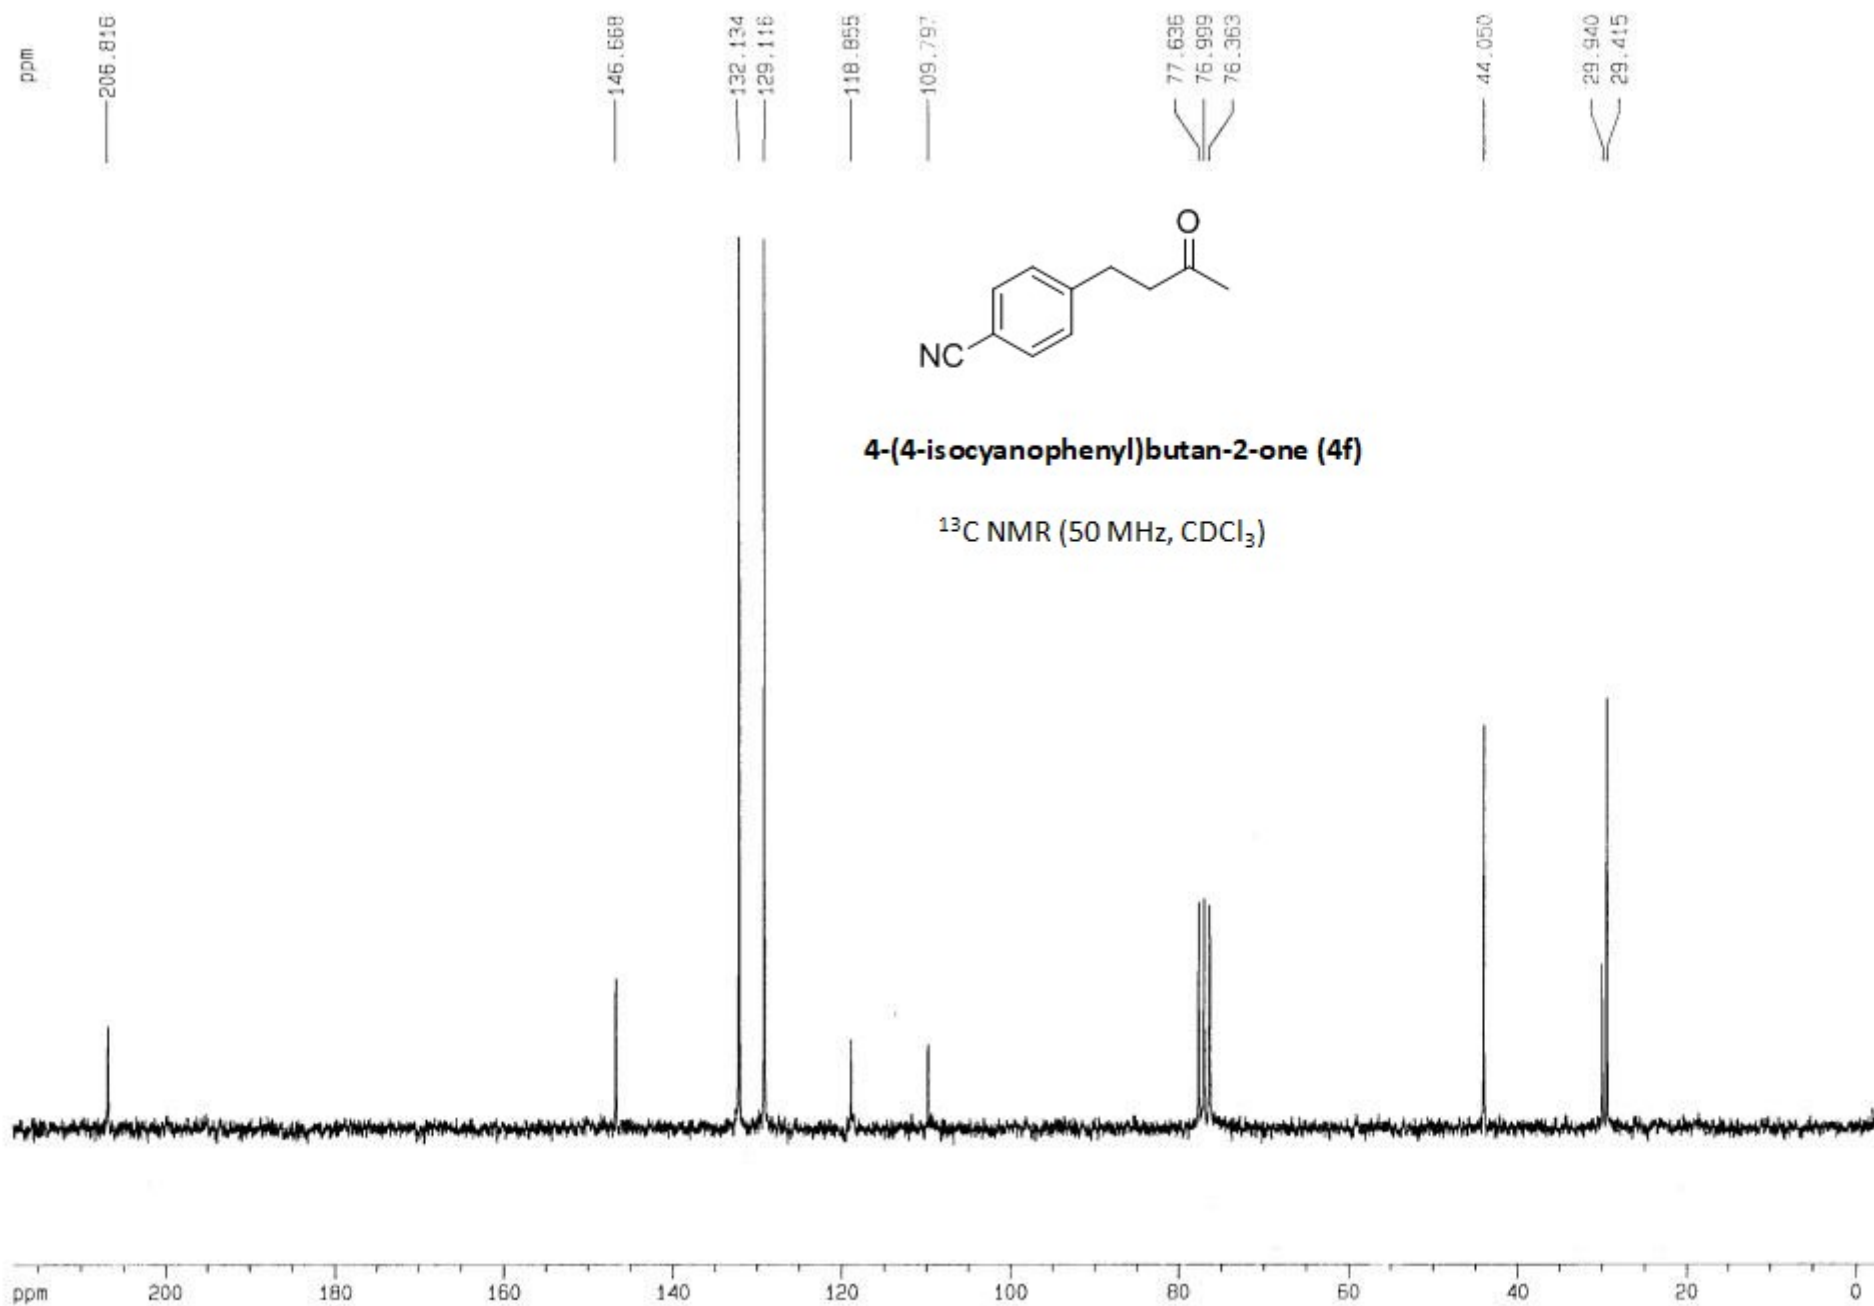

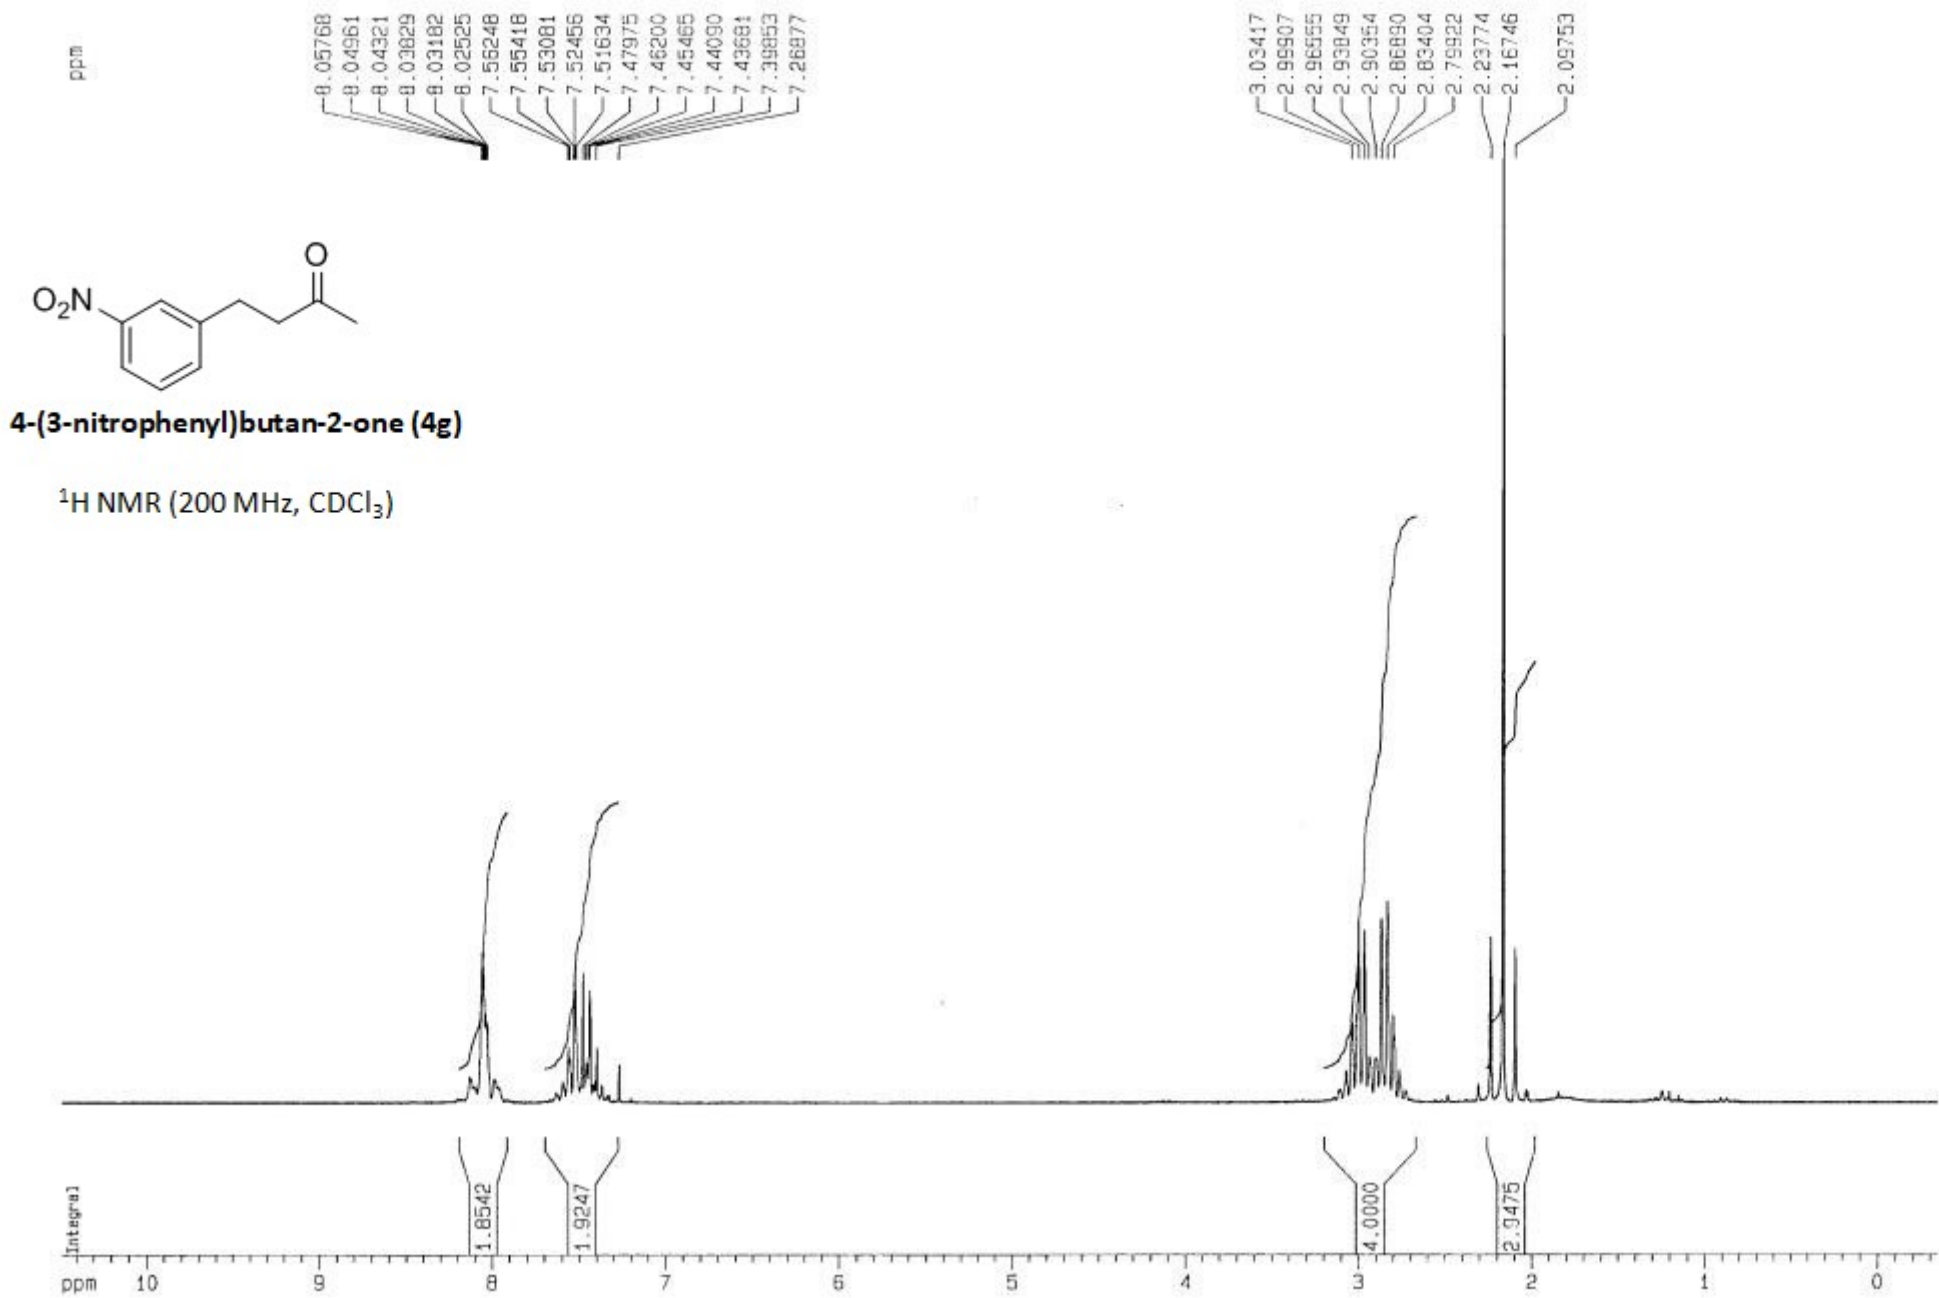

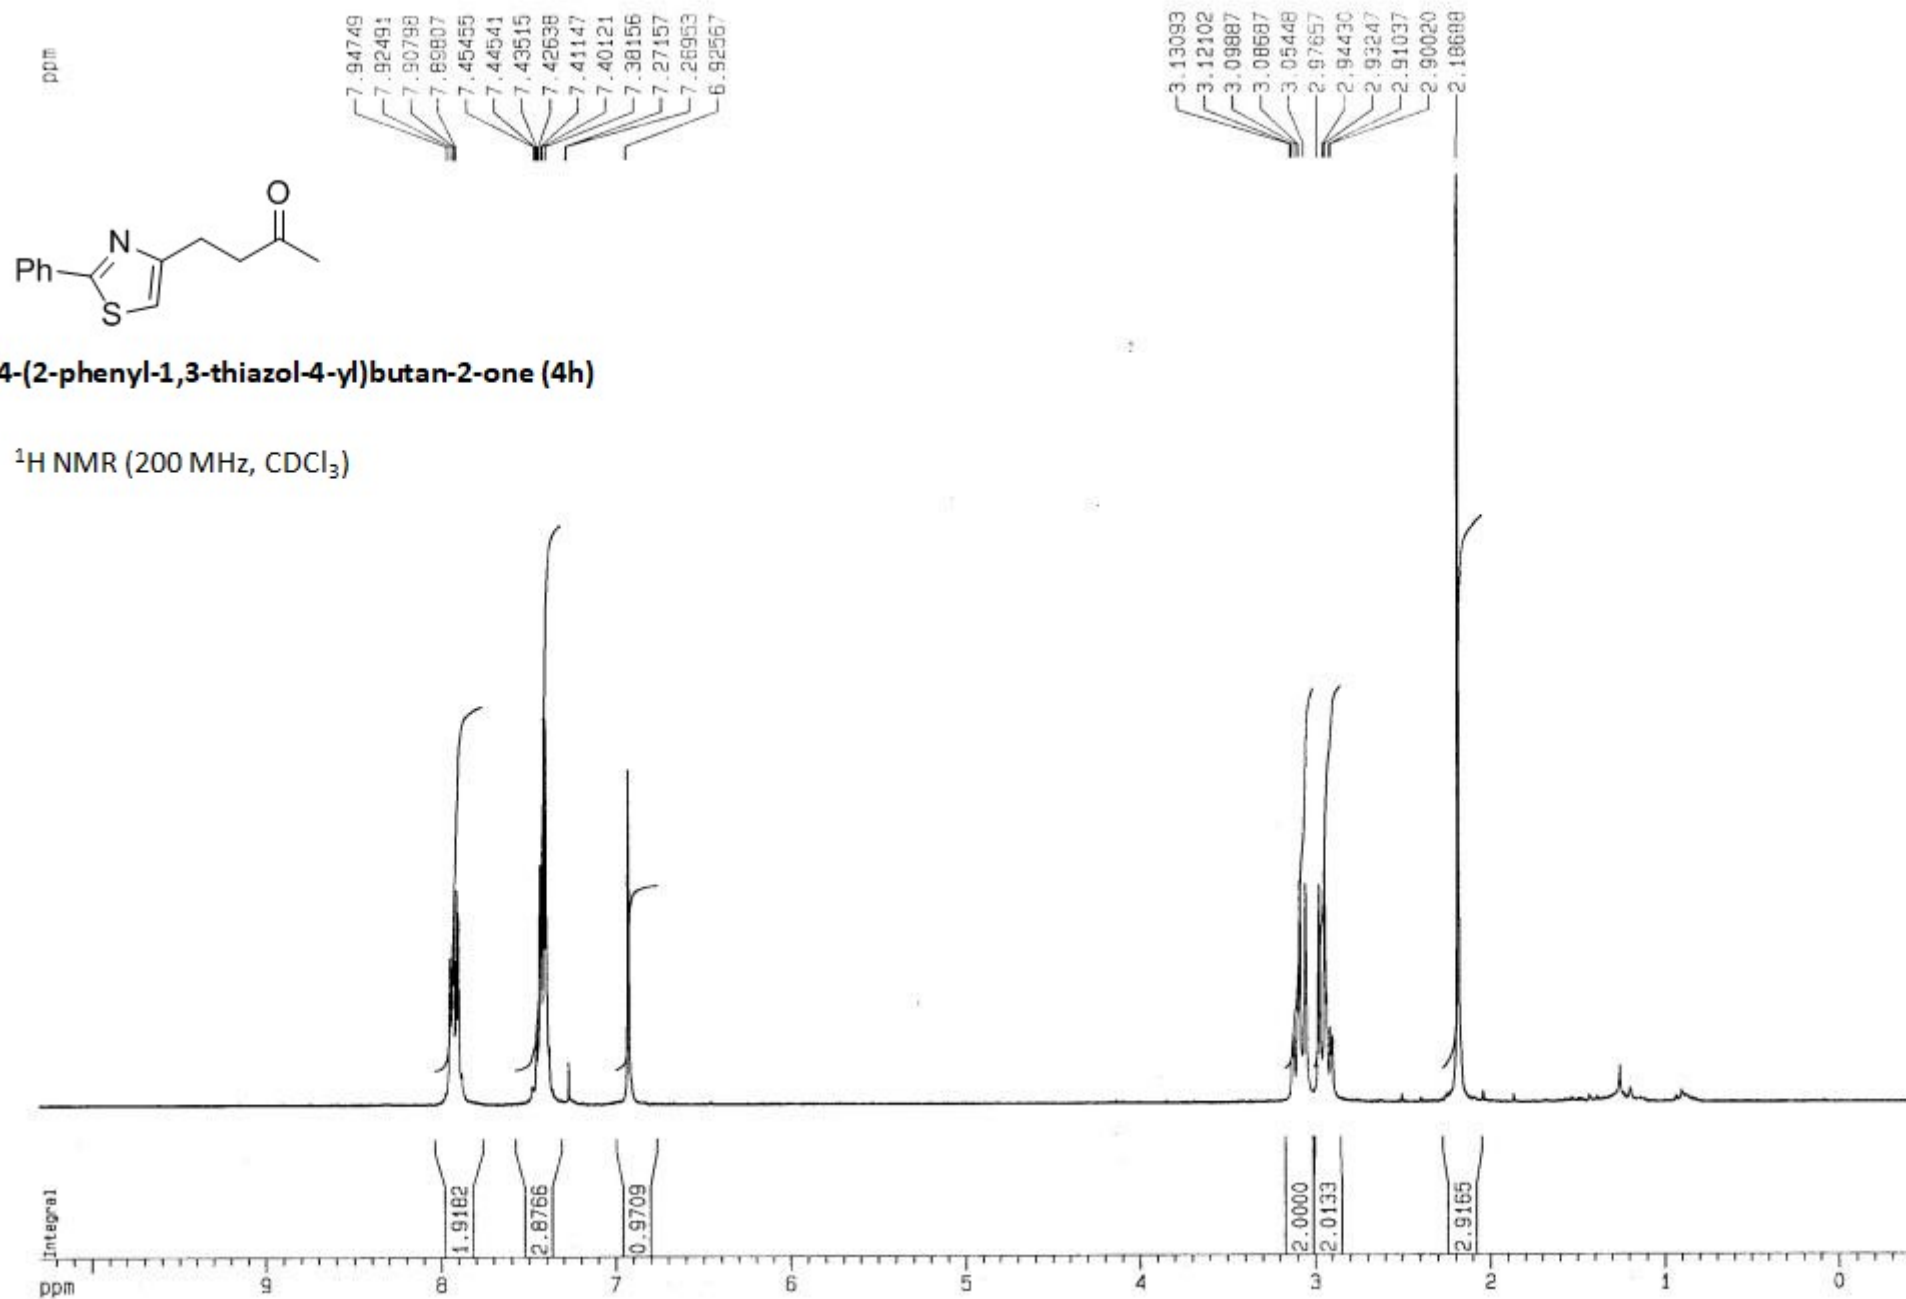

SI 20

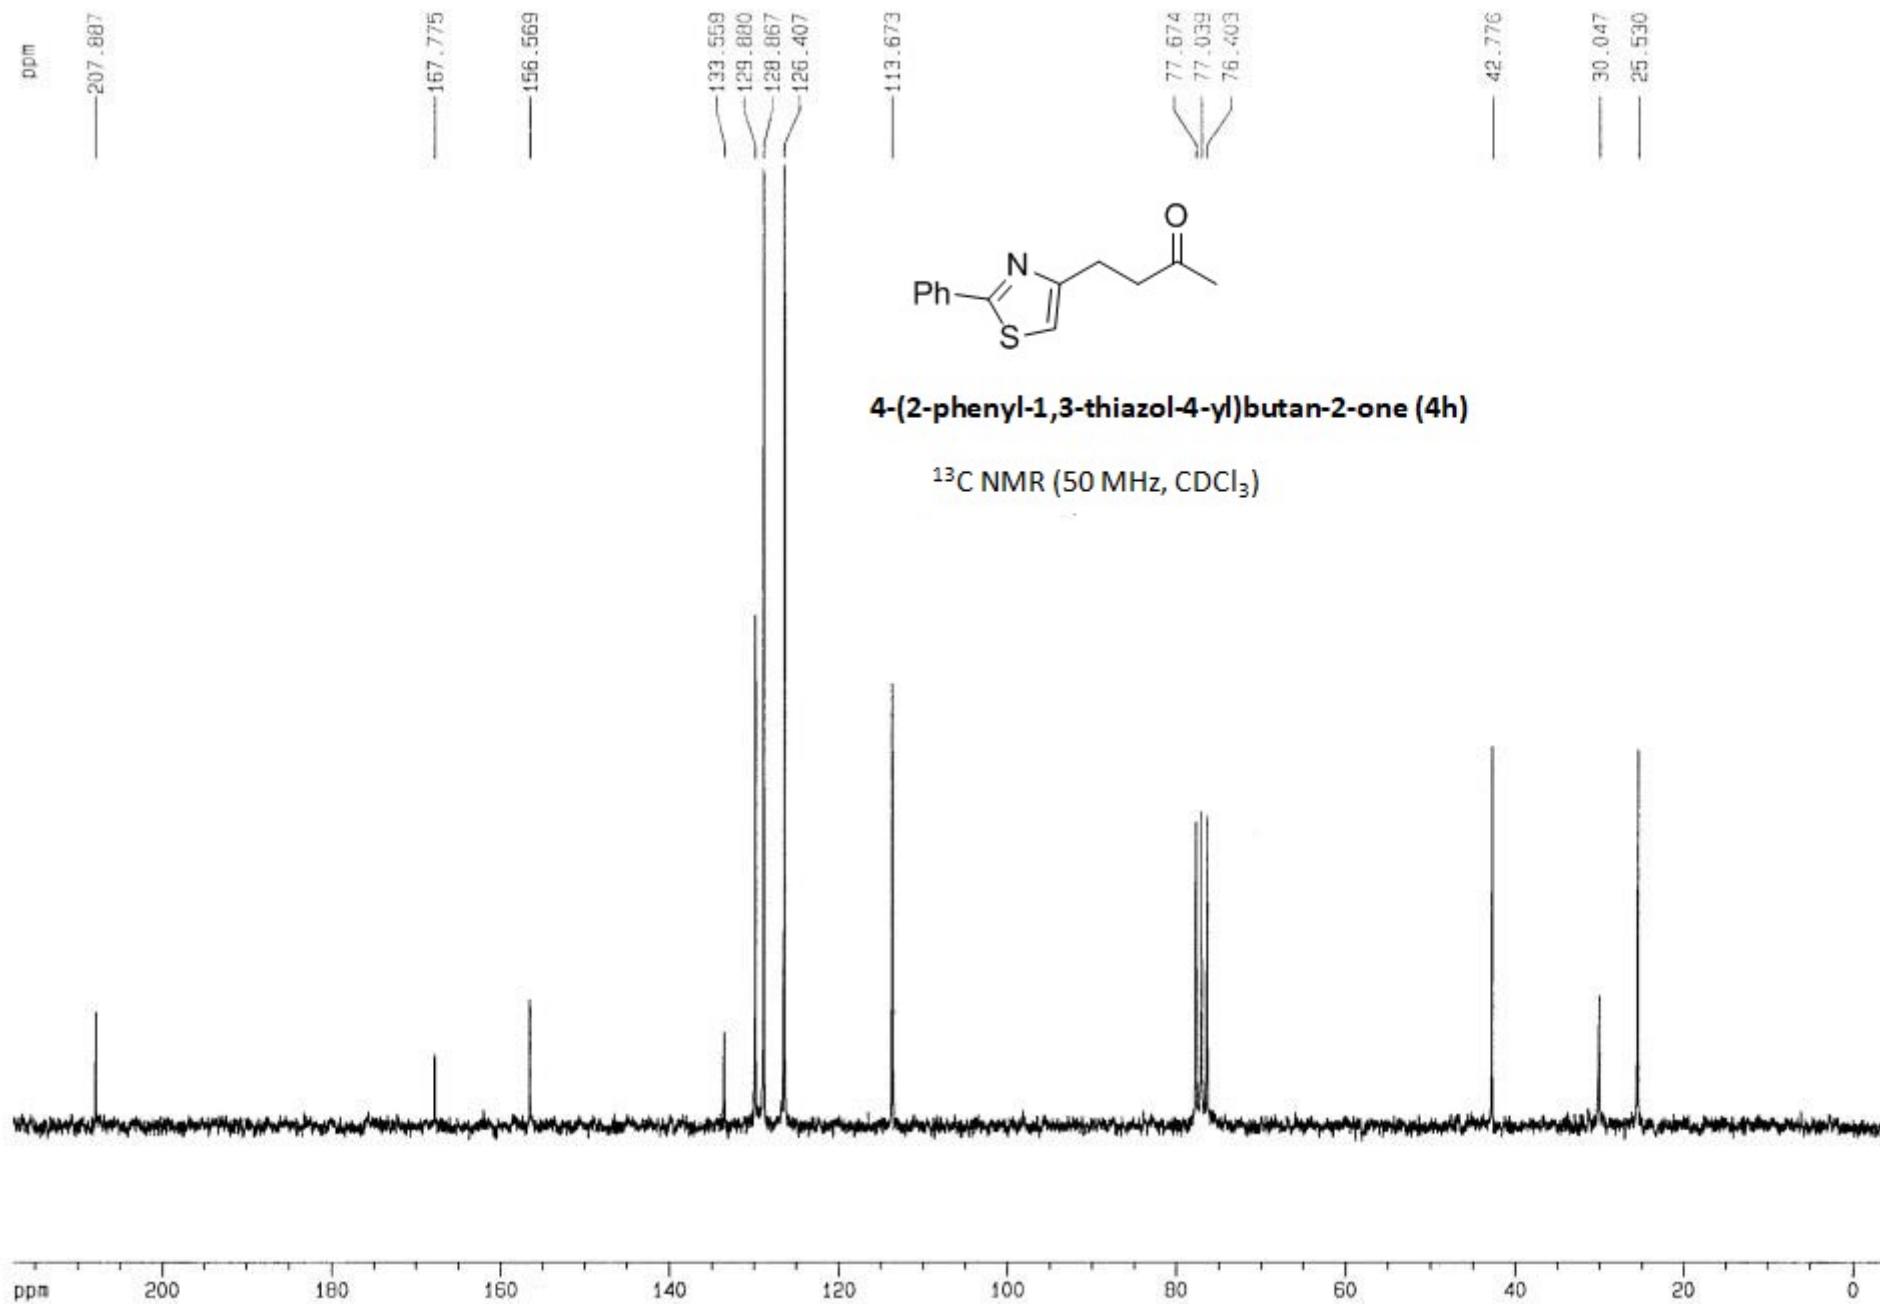

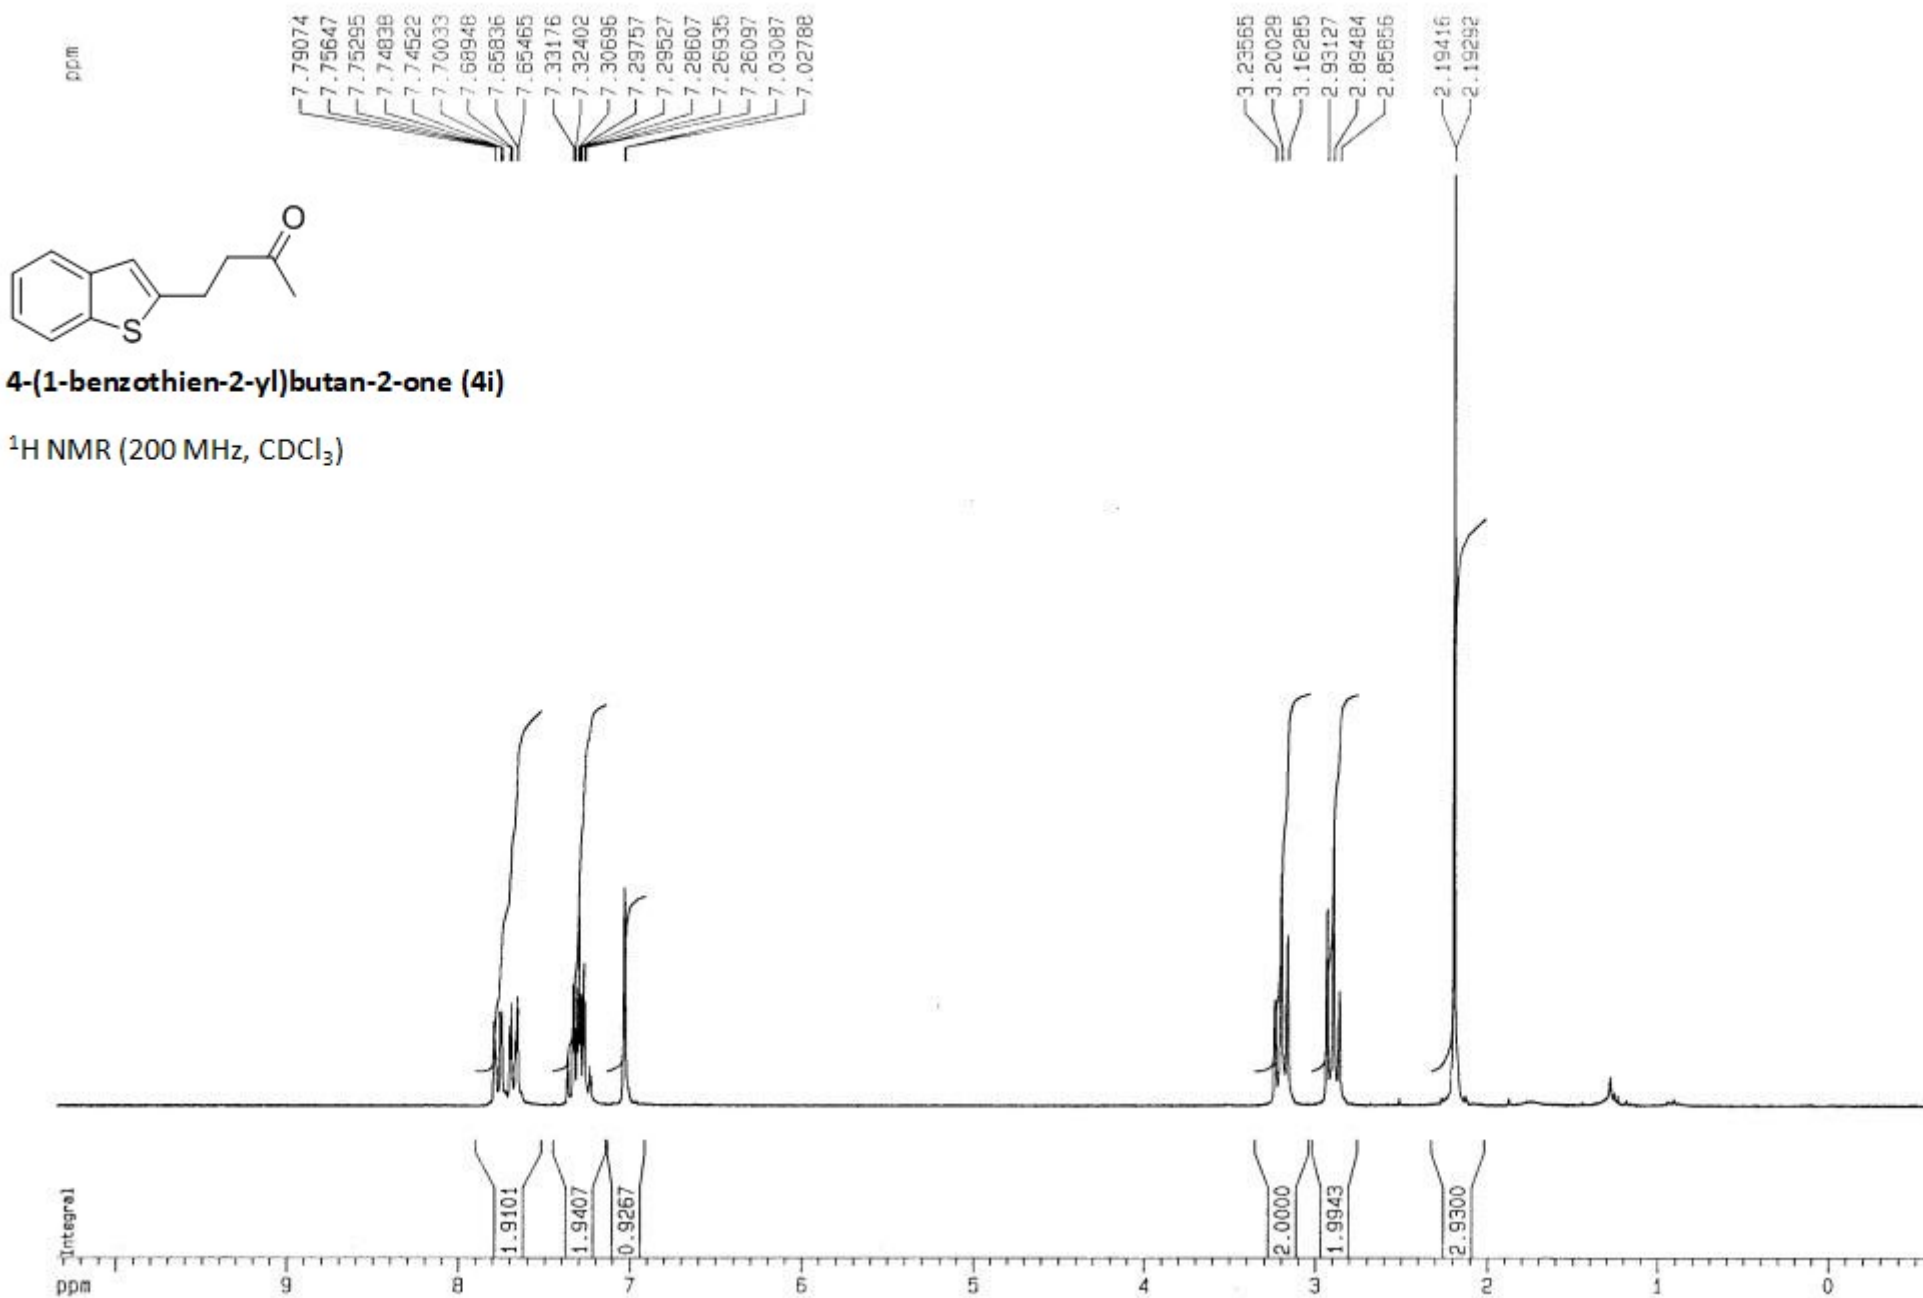

## SI 22

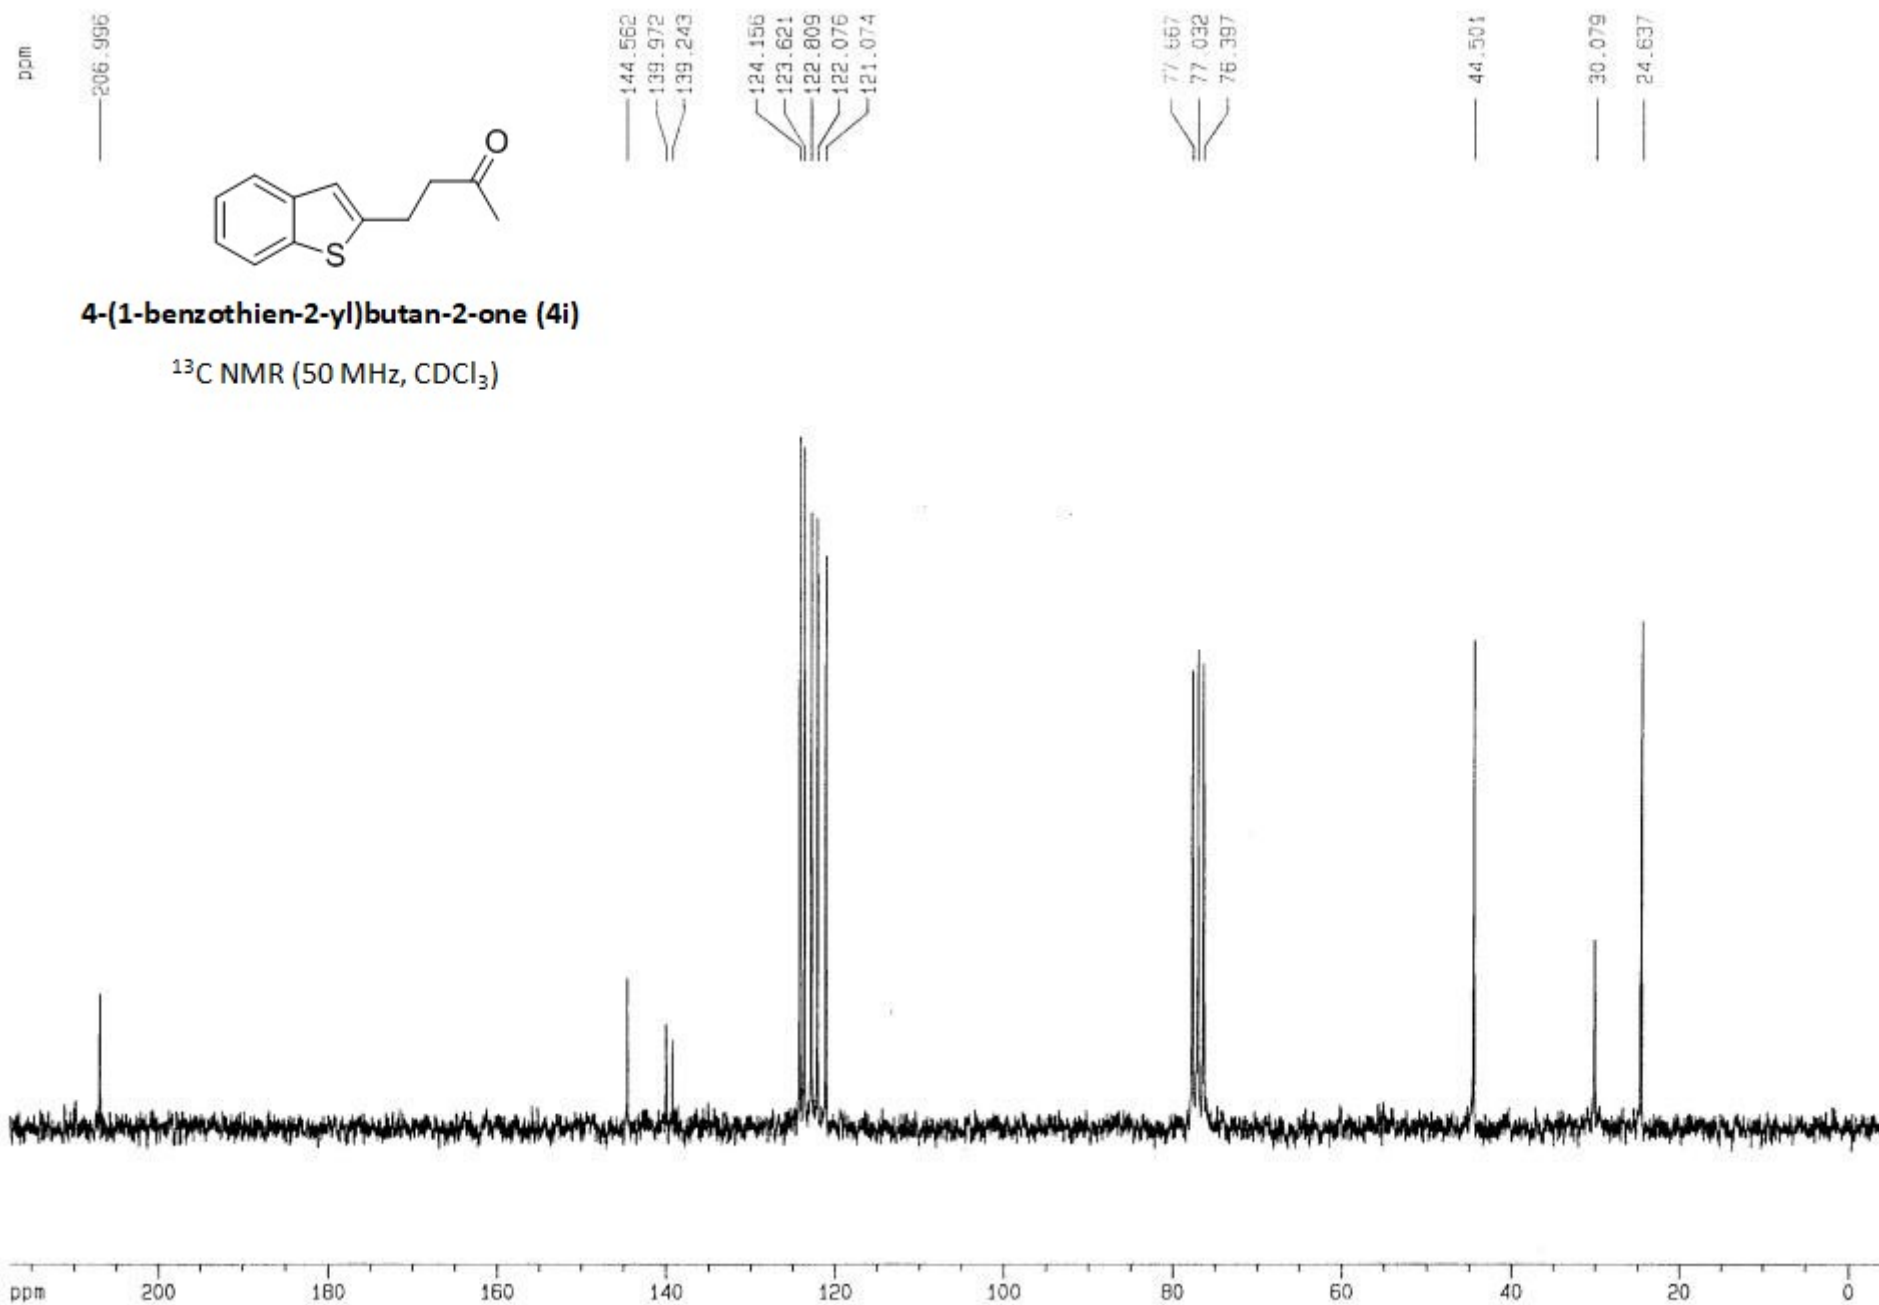

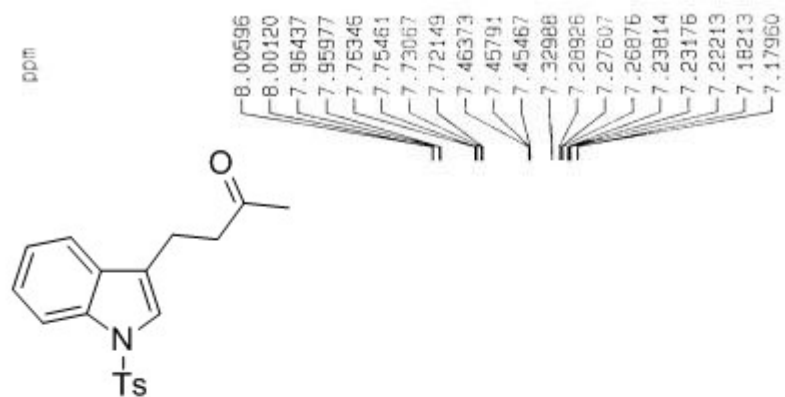**4-{1-[(4-methylphenyl)sulfonyl]-1*H*-indol-3-yl}butan-2-one (4j)**<sup>1</sup>H NMR (200 MHz, CDCl<sub>3</sub>)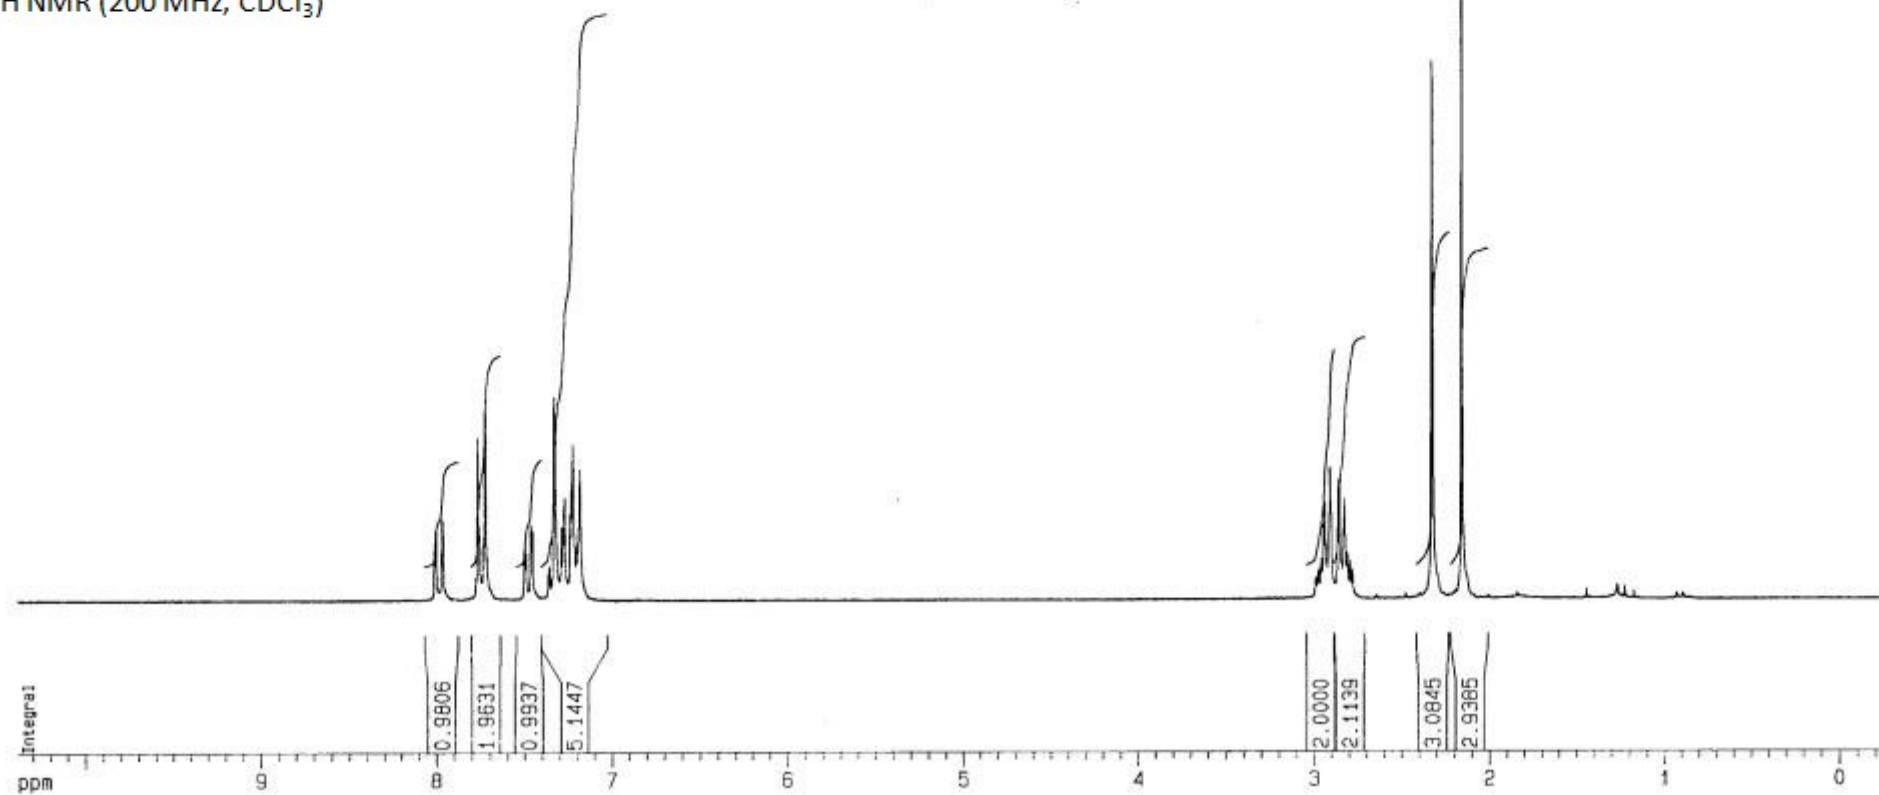

SI 24

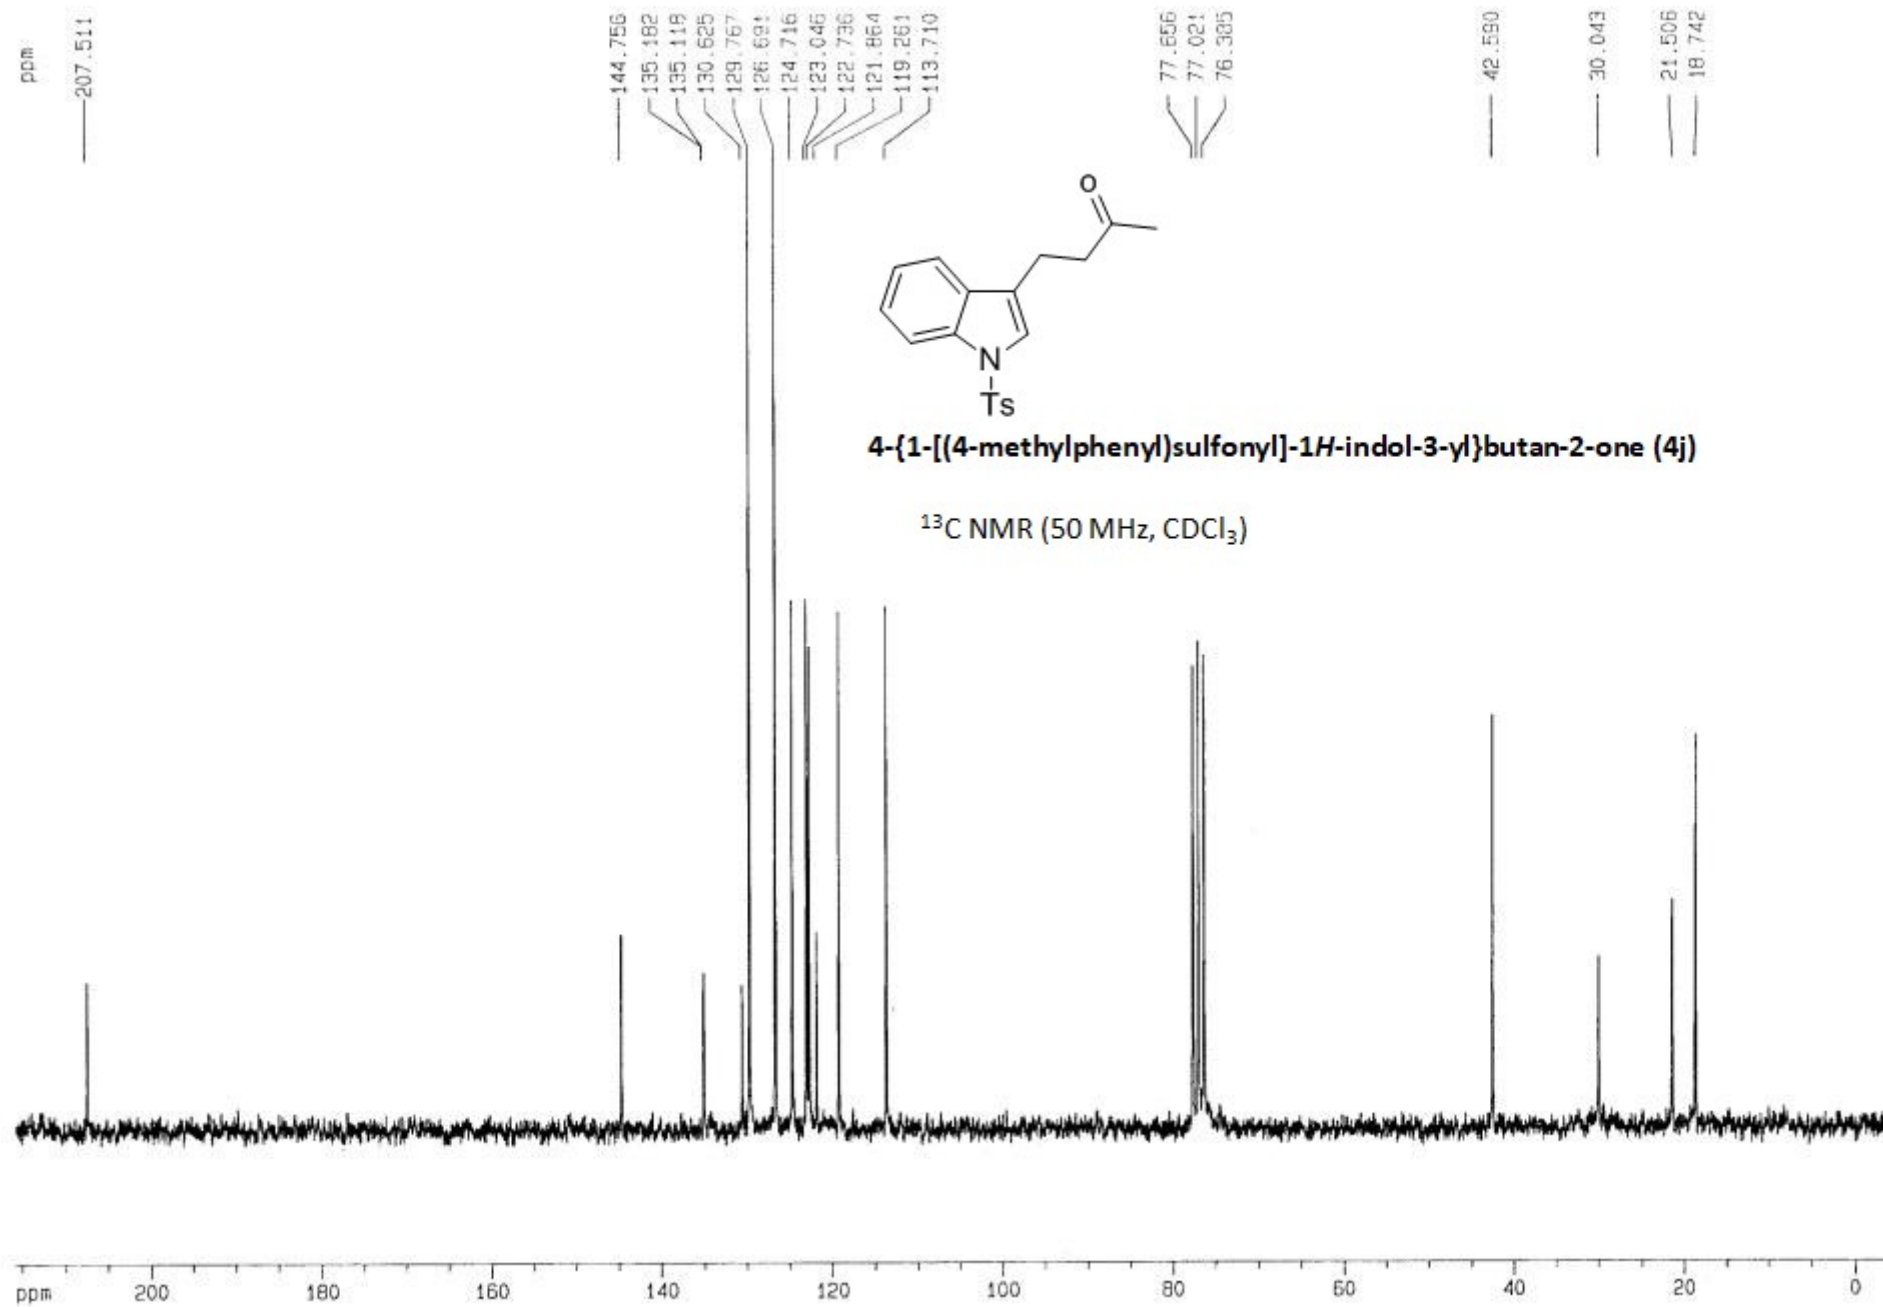



SI 25

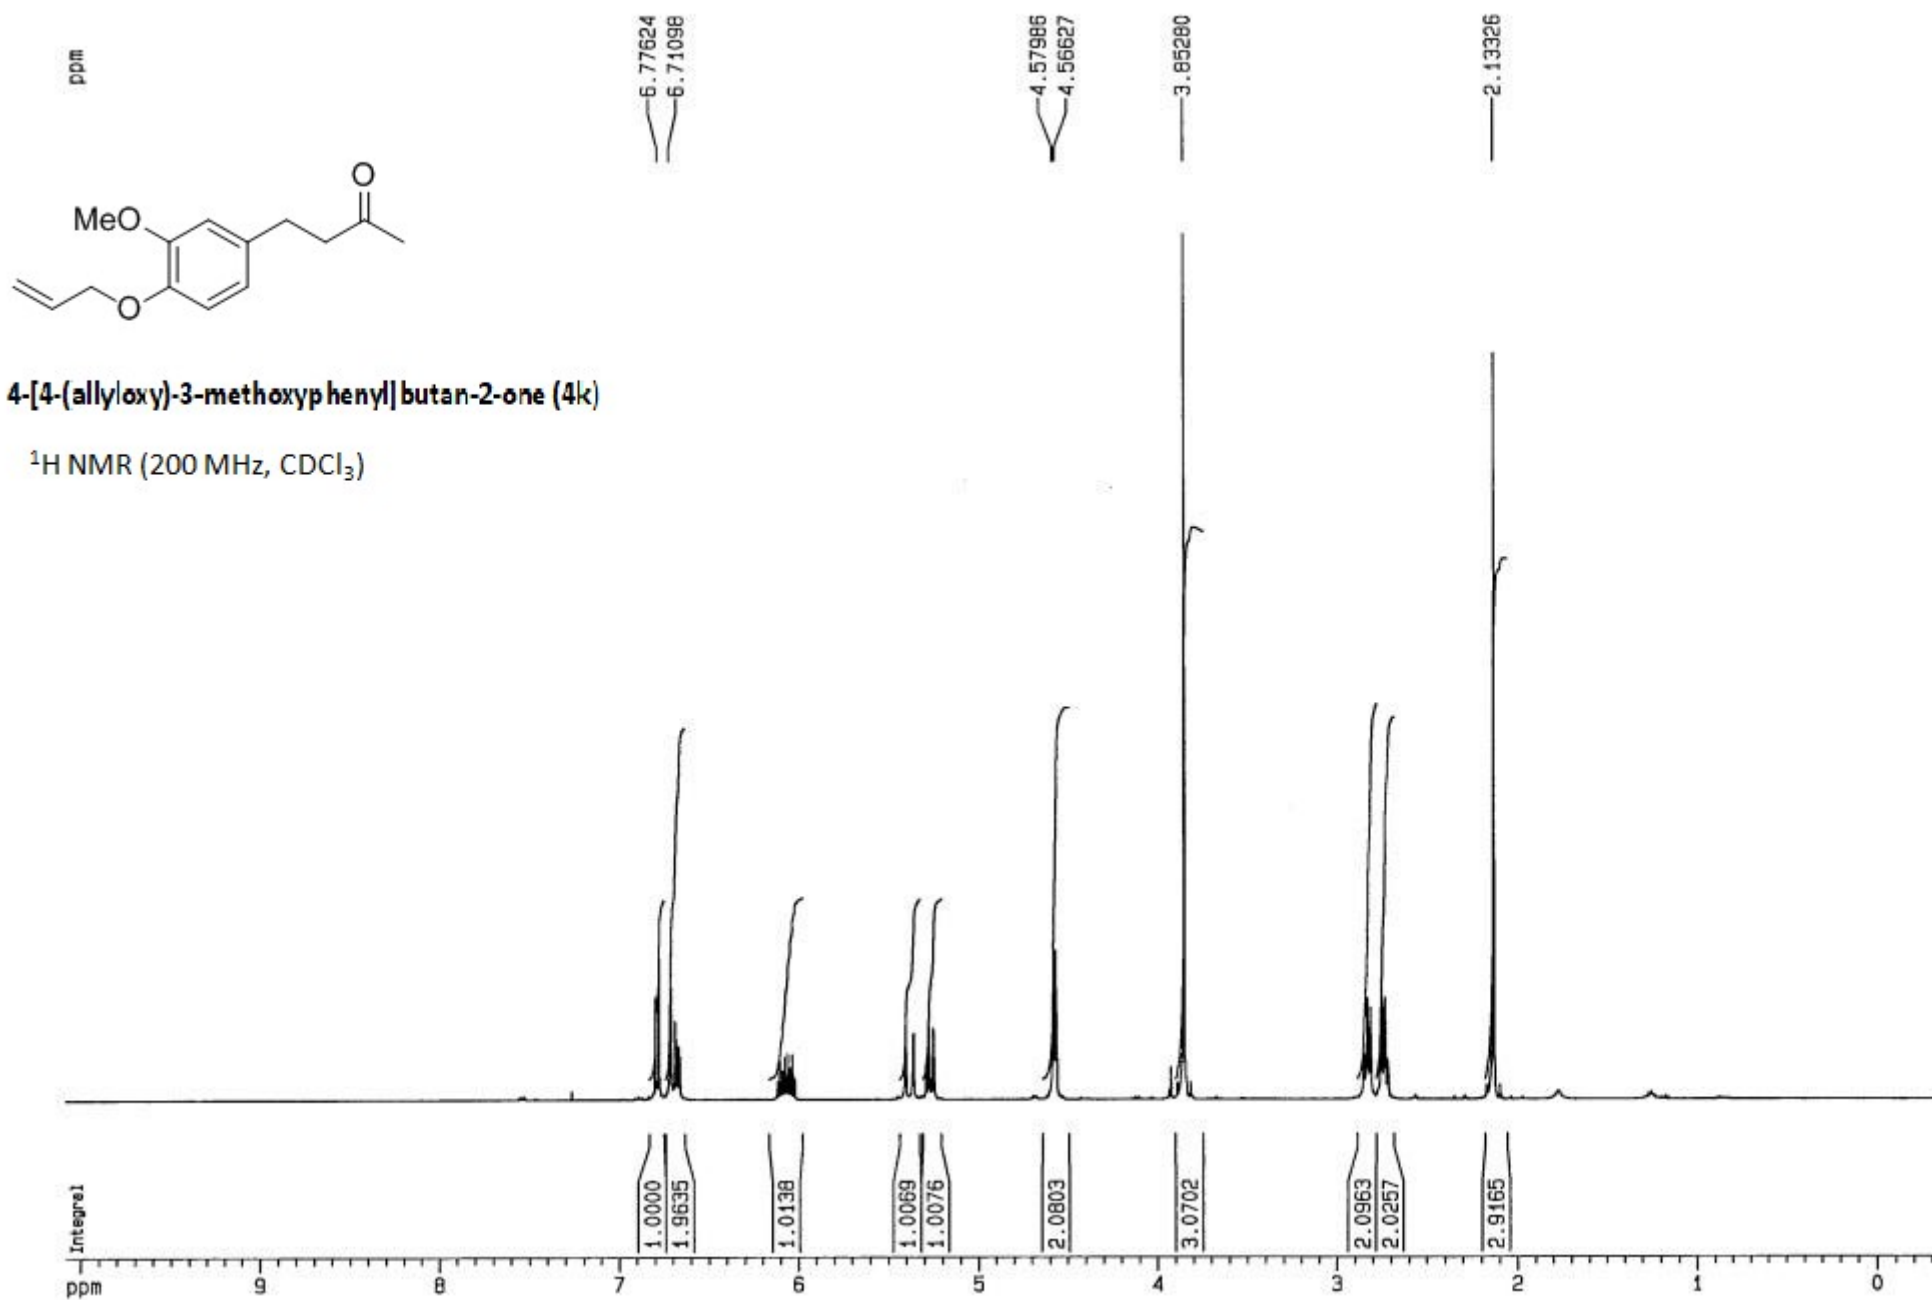

## SI 26

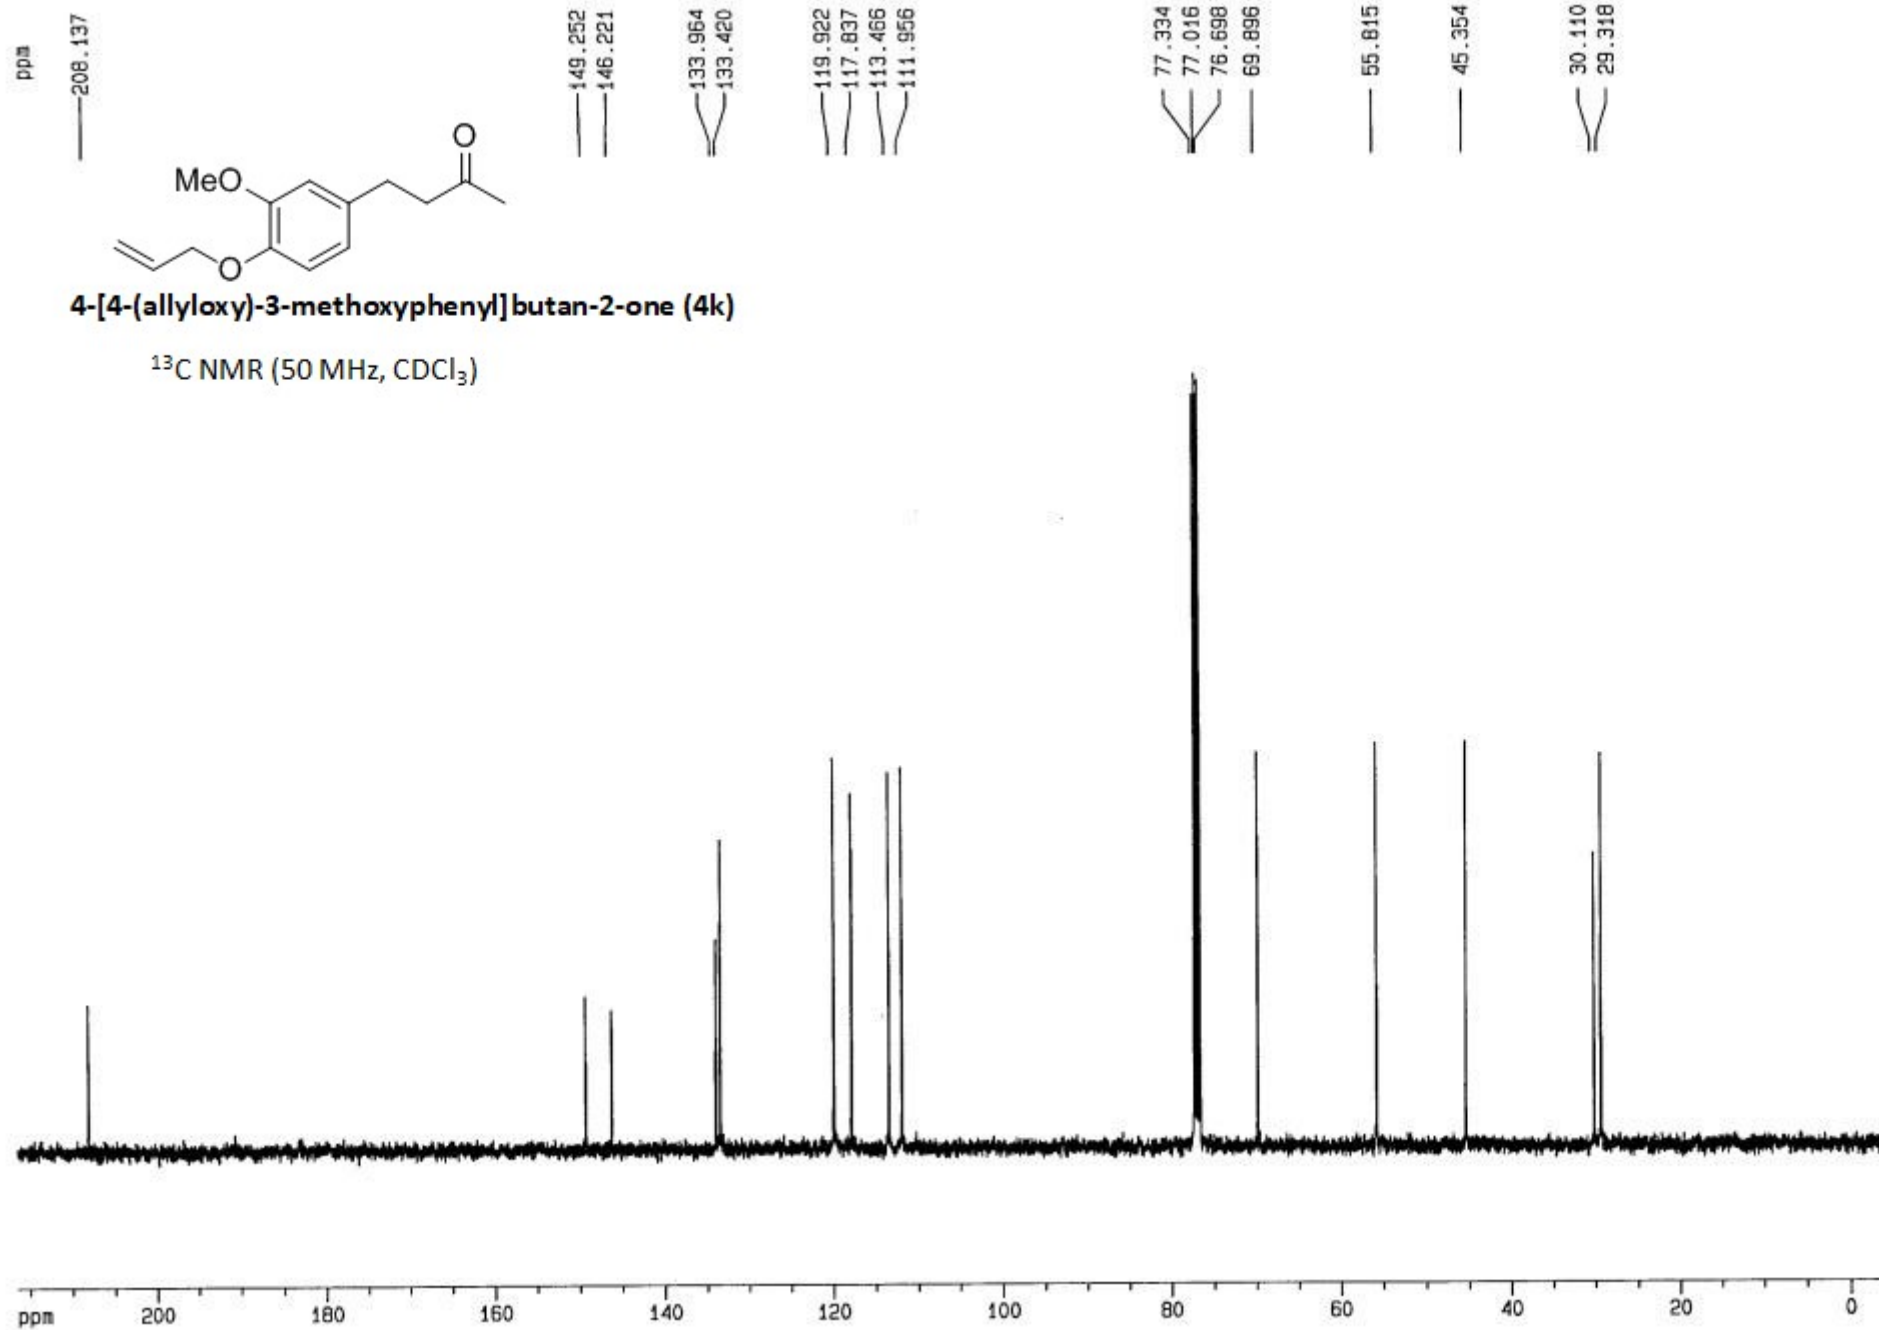

SI 27

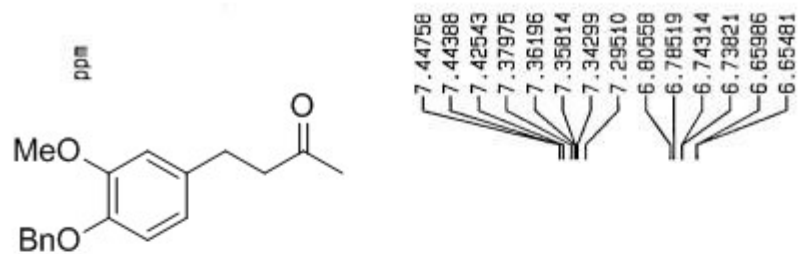

4-[4-(benzyloxy)-3-methoxyphenyl]butan-2-one (4)

$^1\text{H}$  NMR (400 MHz,  $\text{CDCl}_3$ )

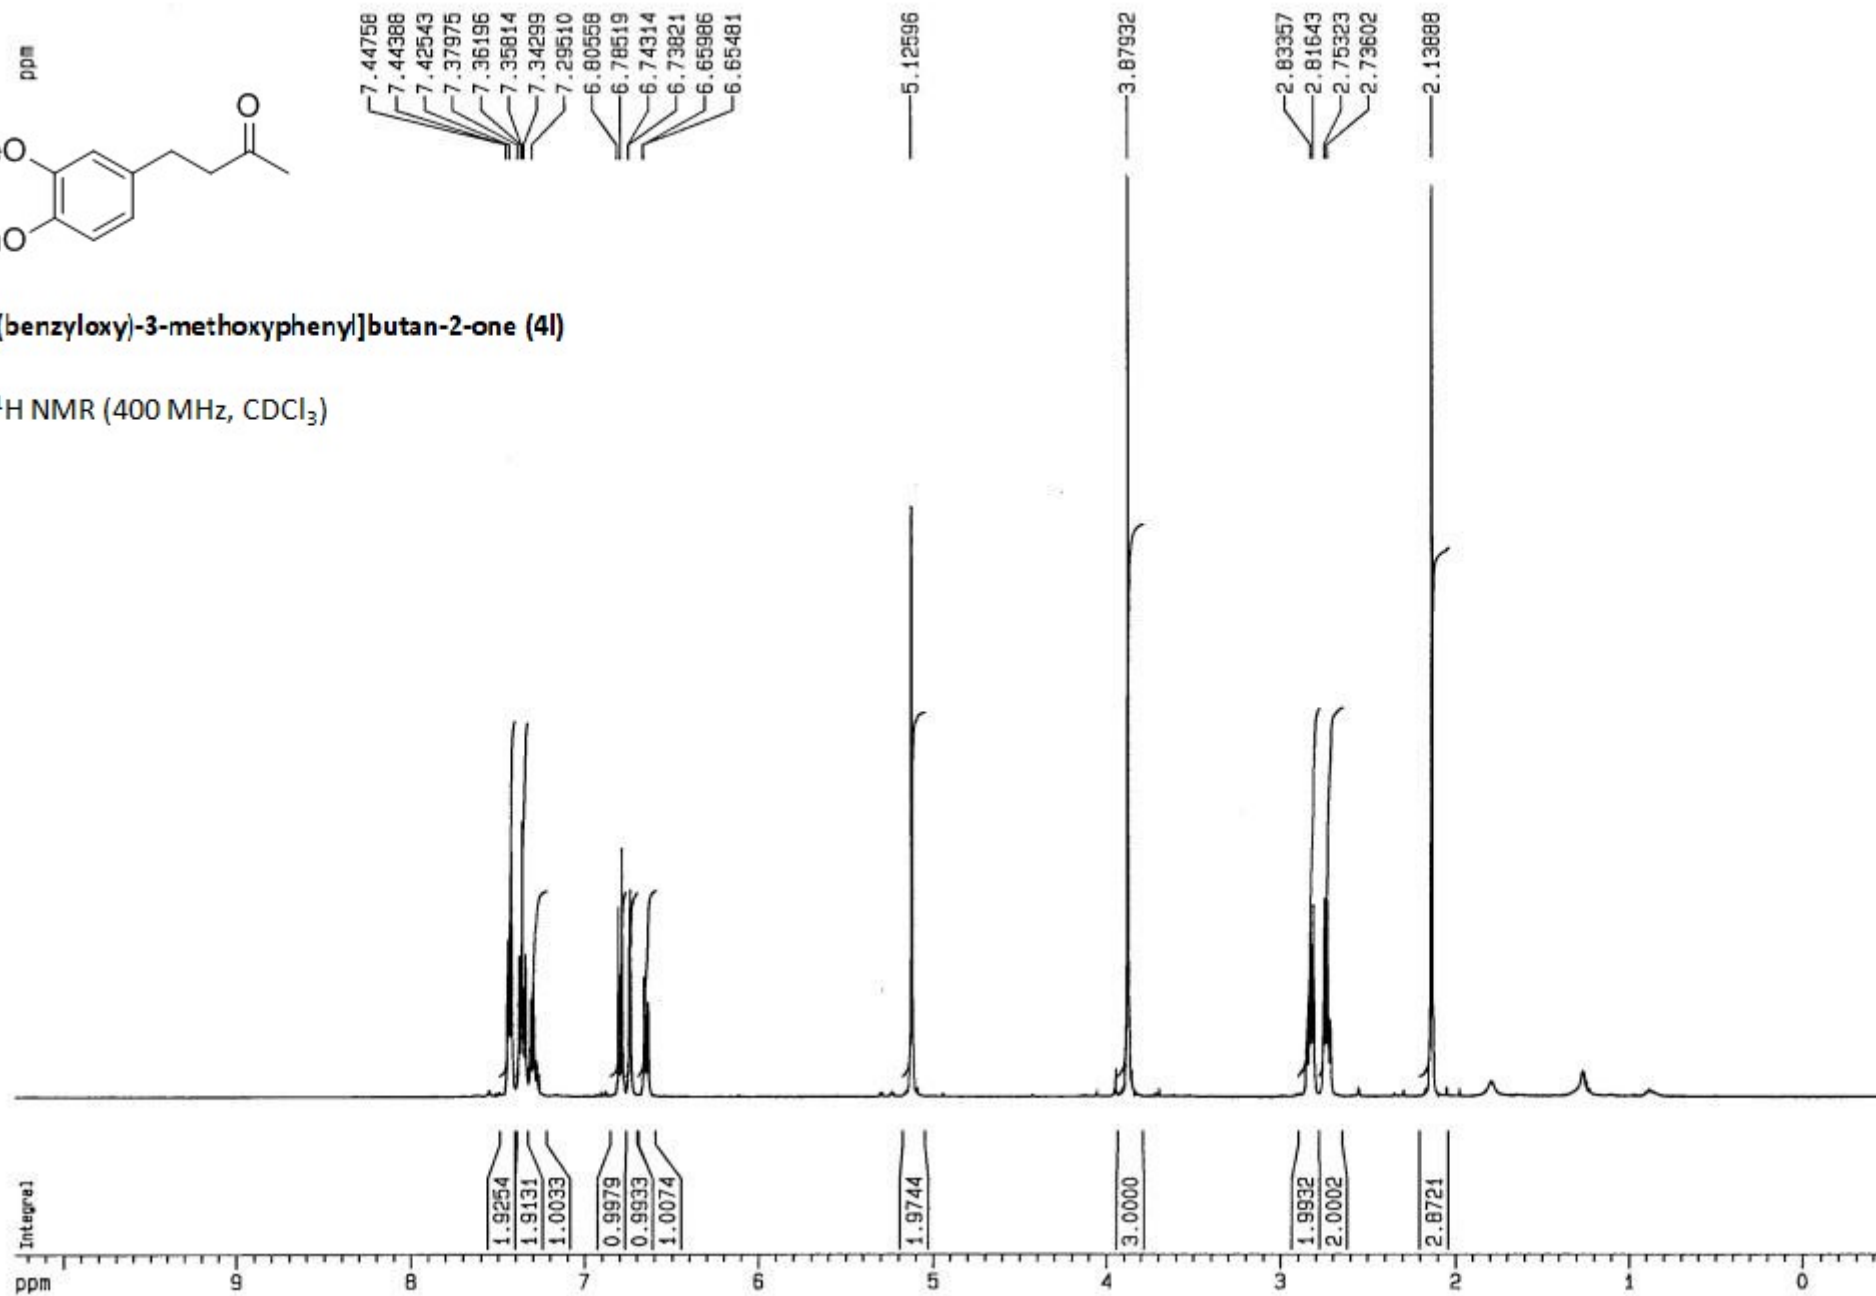

SI 28

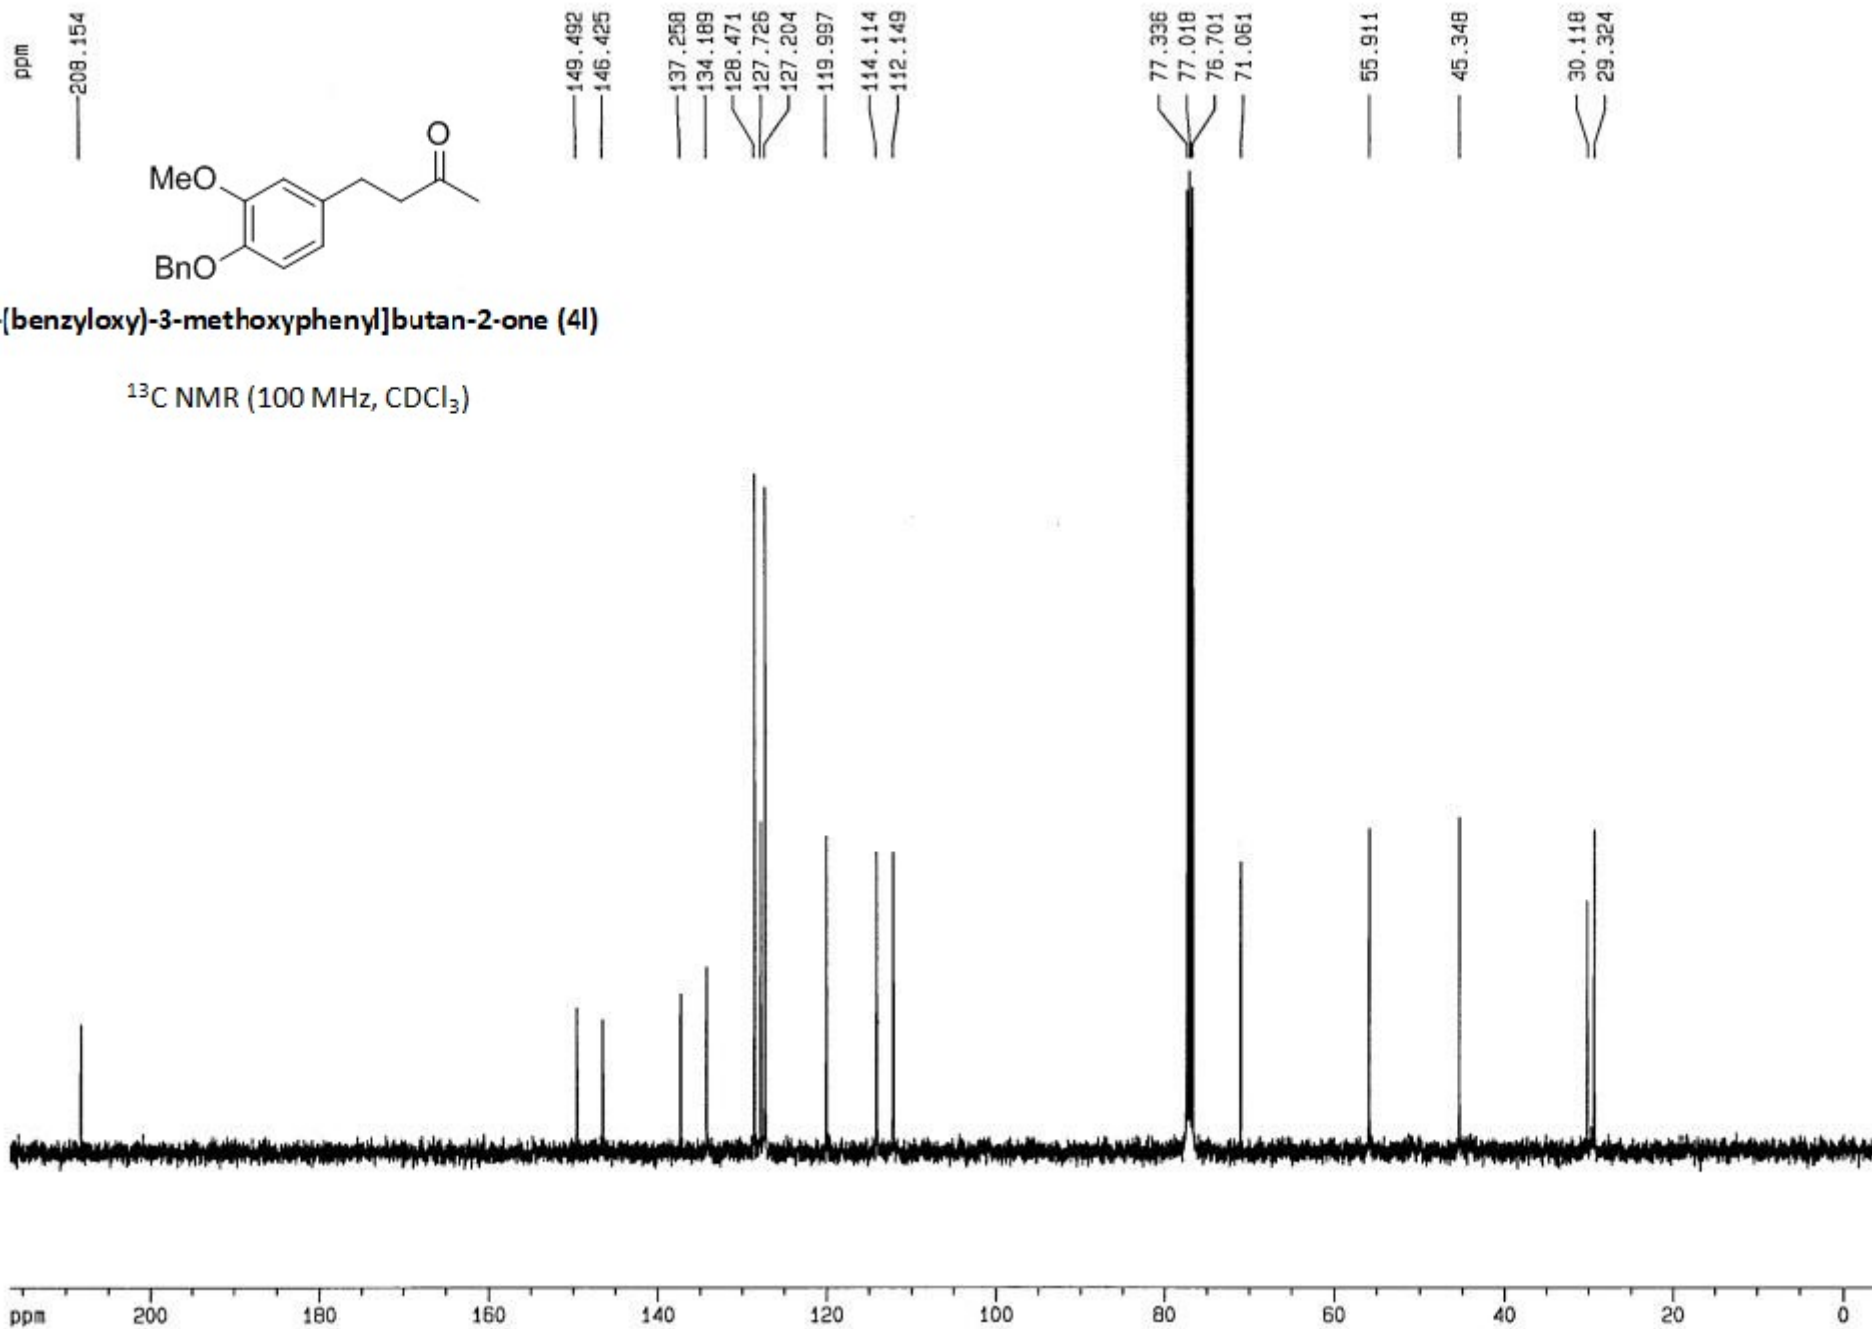

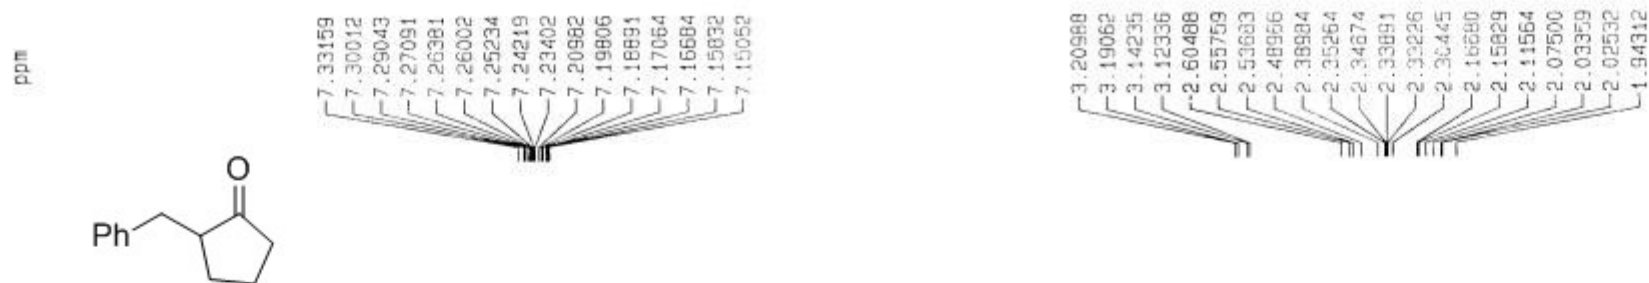**2-benzylcyclopentanone (4m)** $^1\text{H}$  NMR (200 MHz,  $\text{CDCl}_3$ )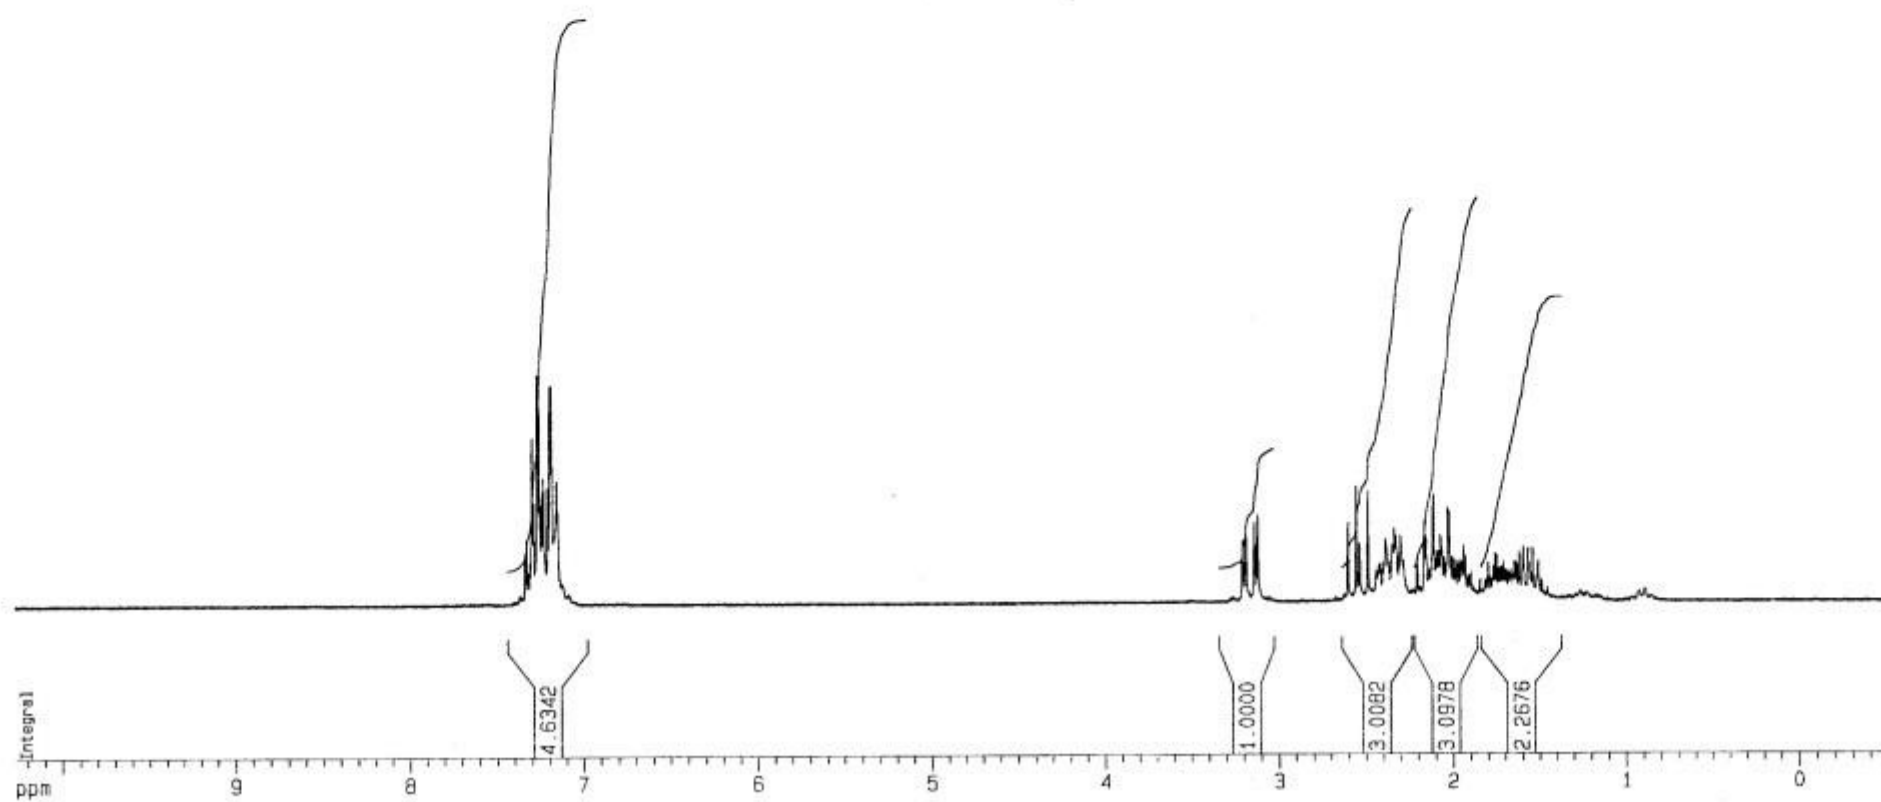

SI 30

ppm

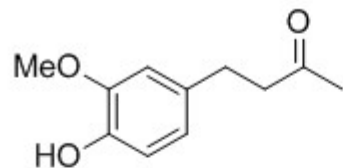

4-(4-hydroxy-3-methoxyphenyl)butan-2-one (7)

$^1\text{H}$  NMR (200 MHz,  $\text{CDCl}_3$ )

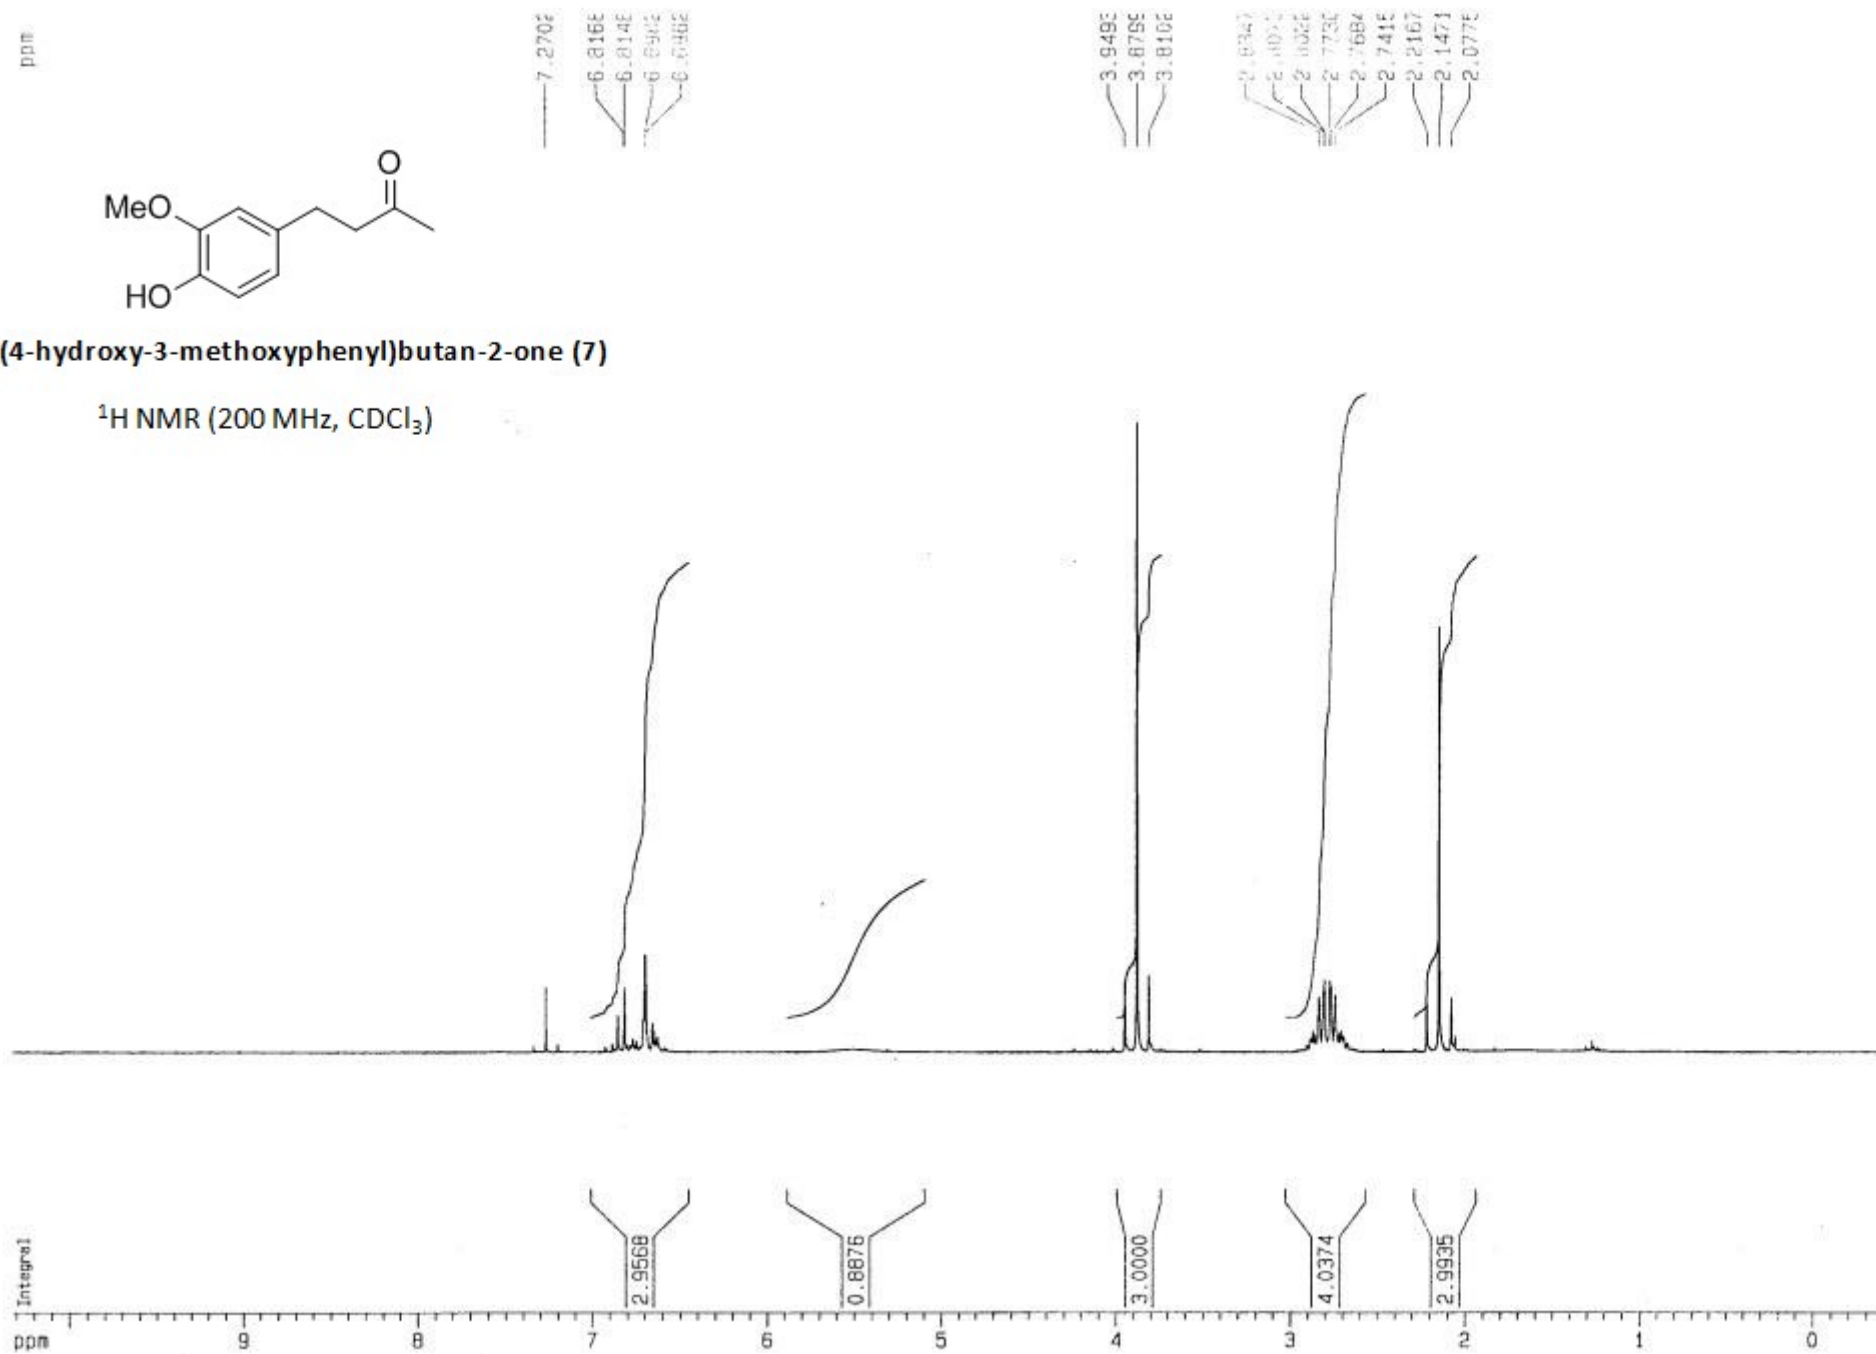

SI 31

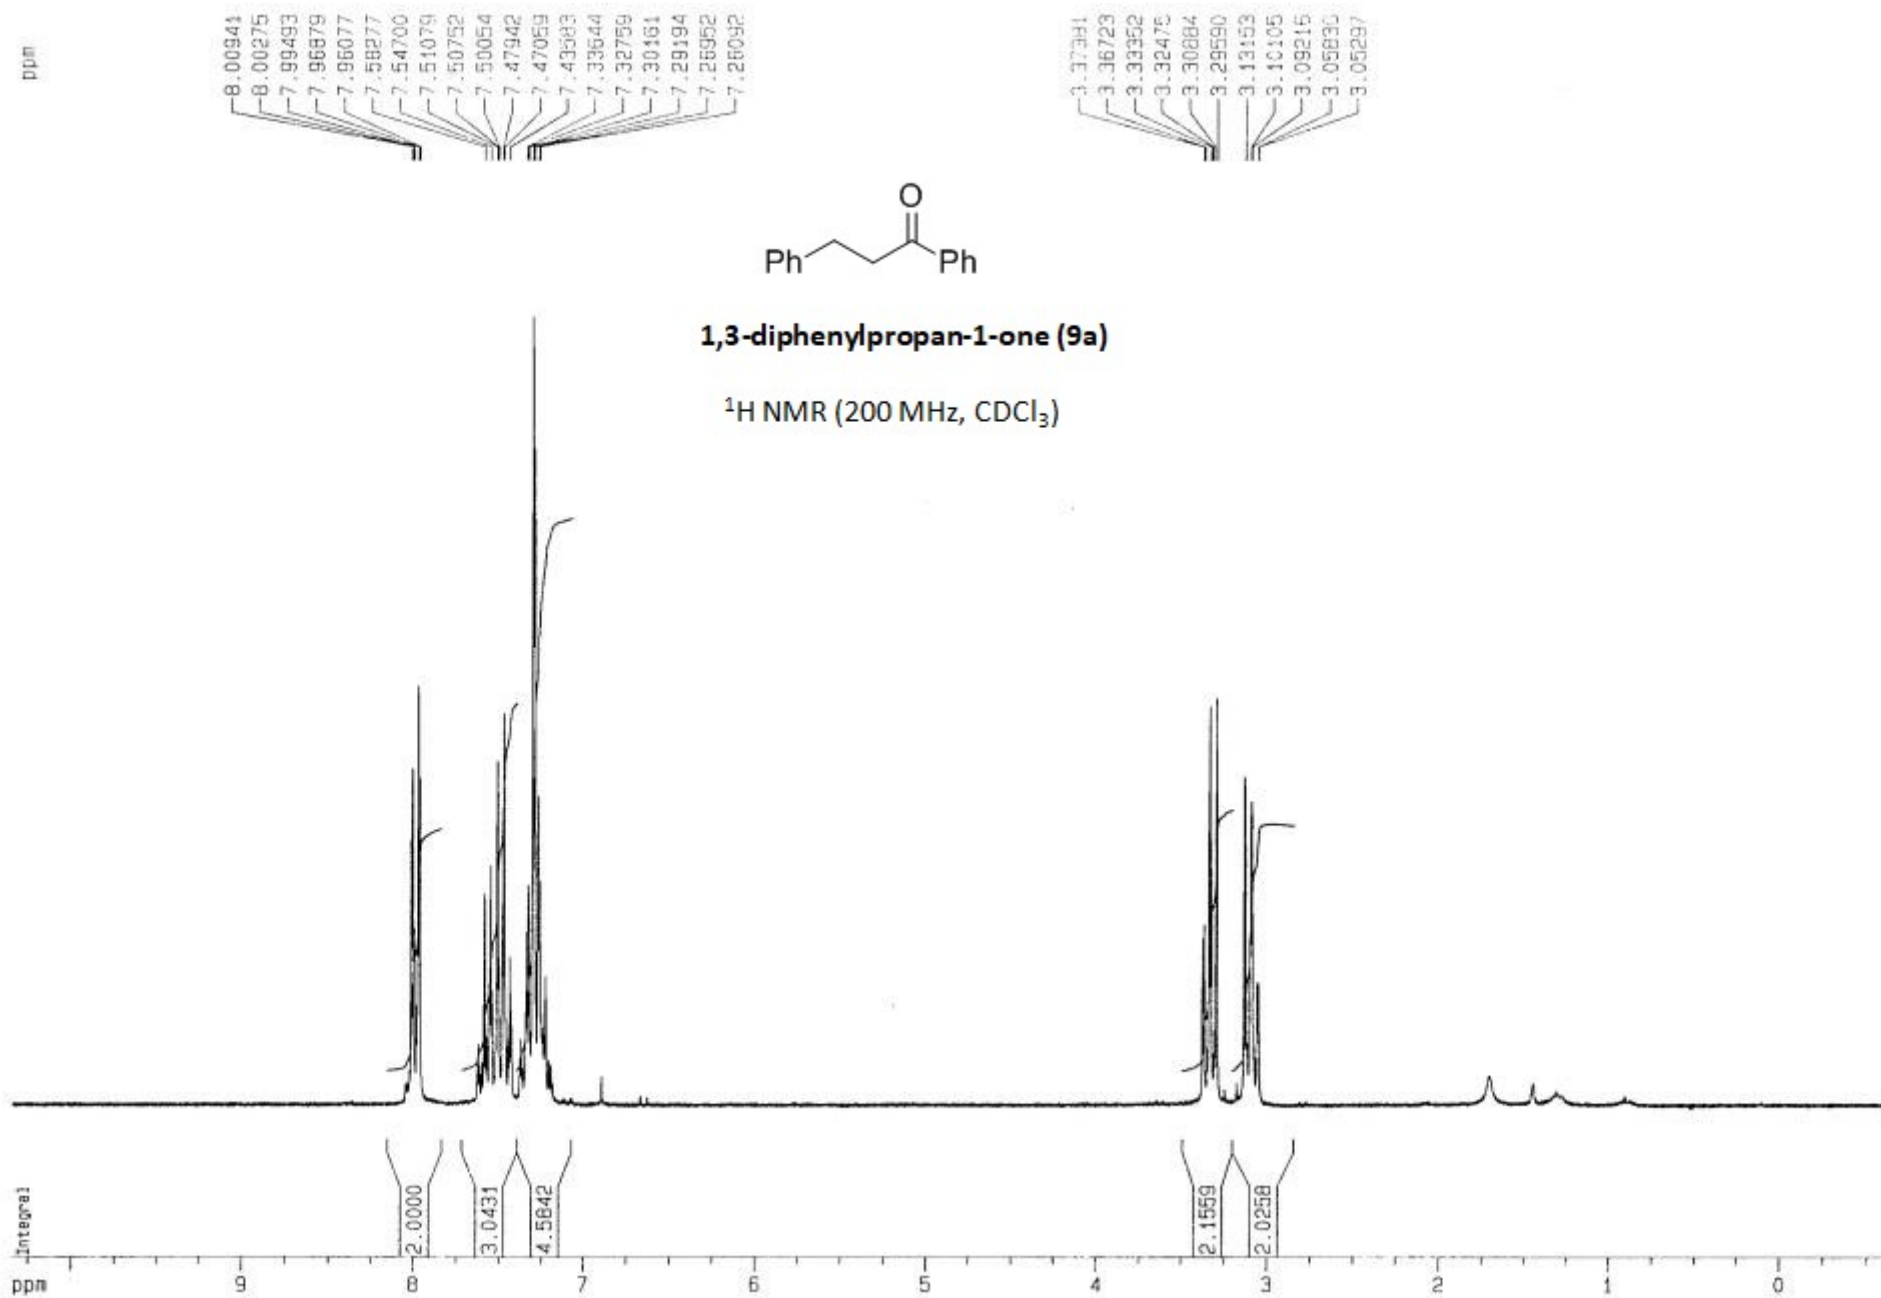

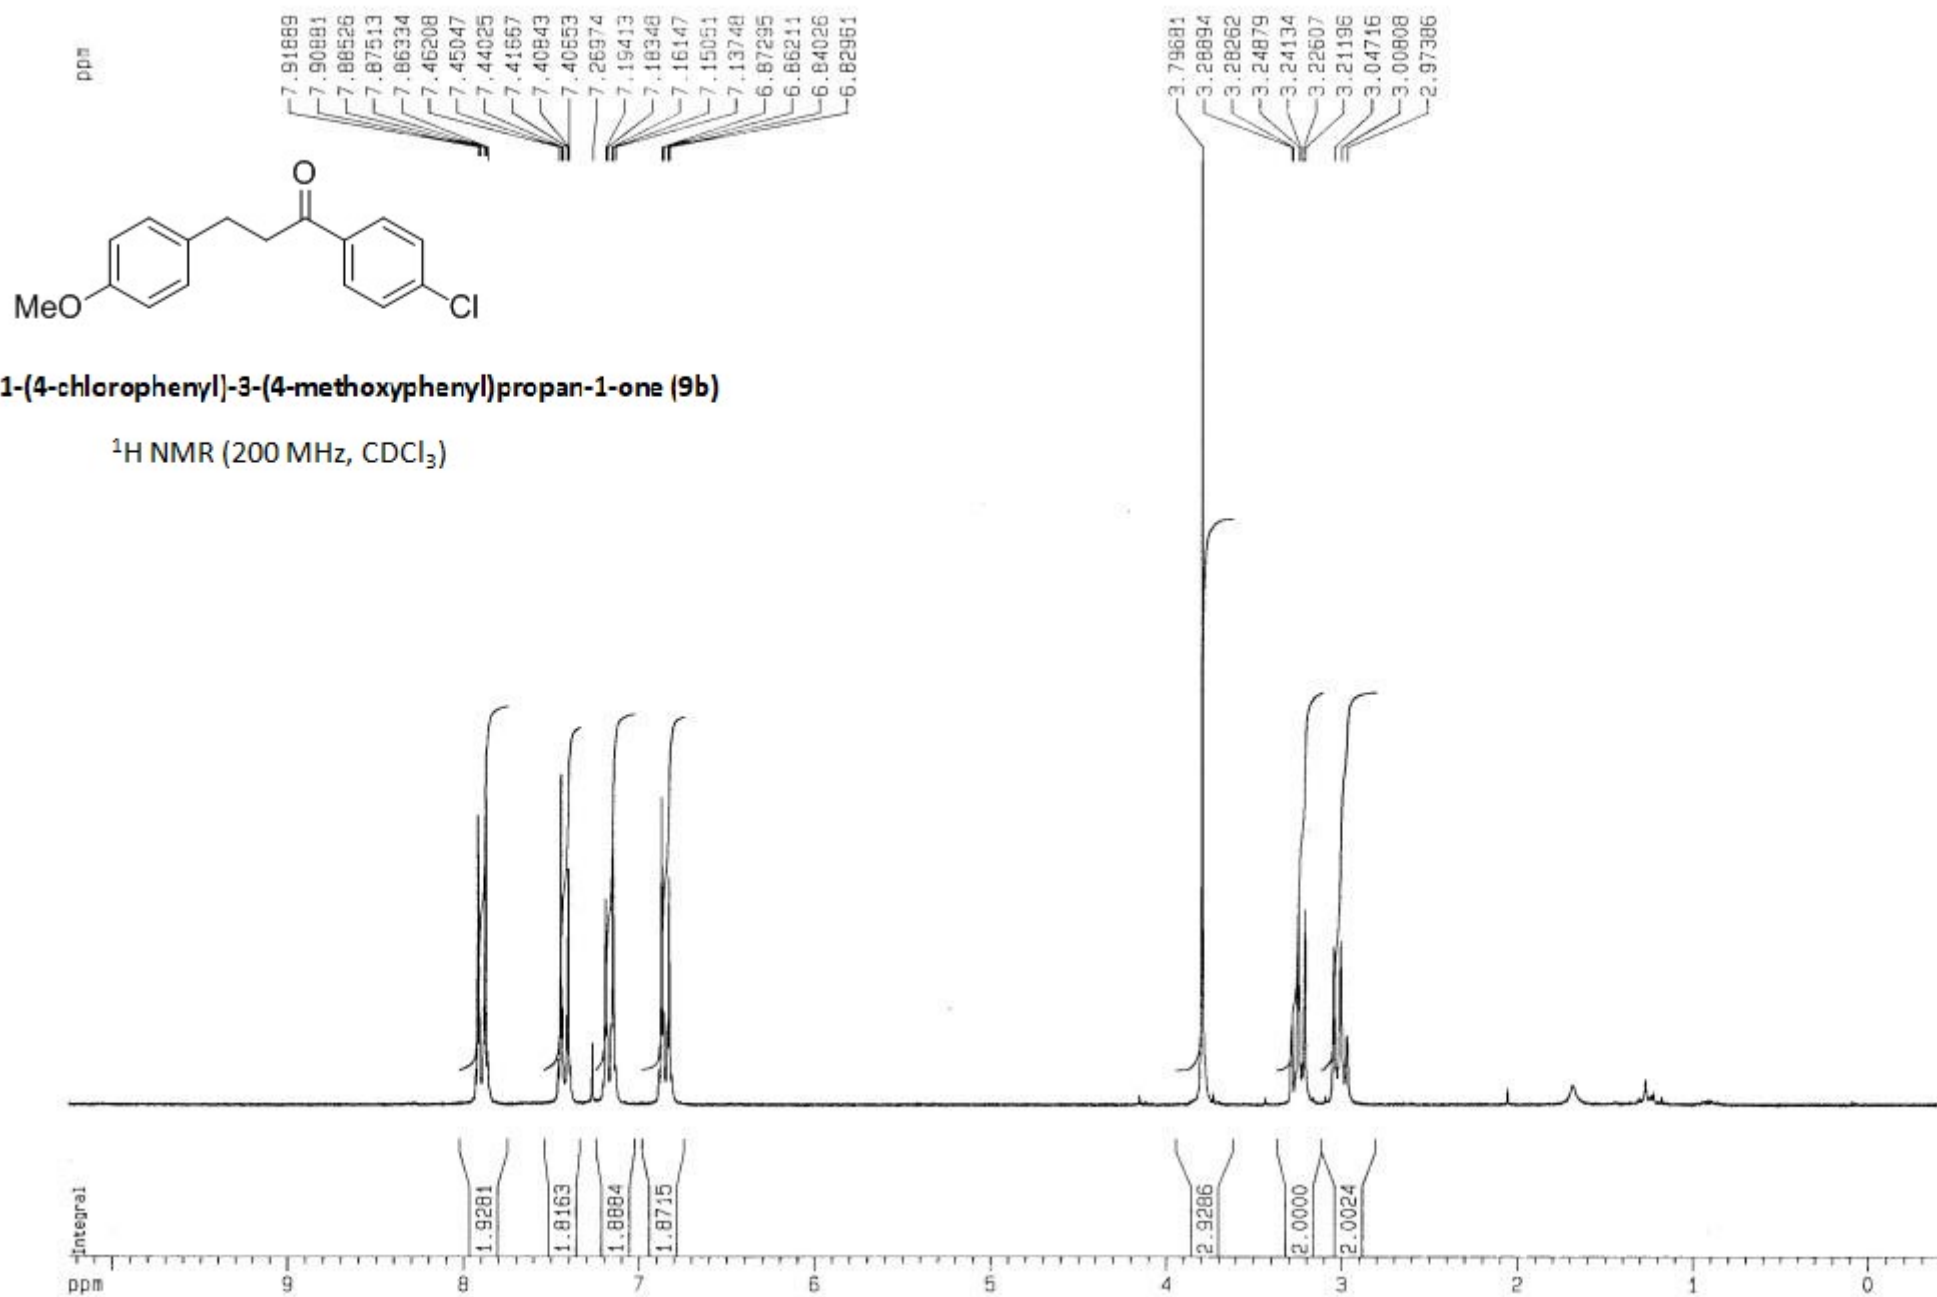



SI 33

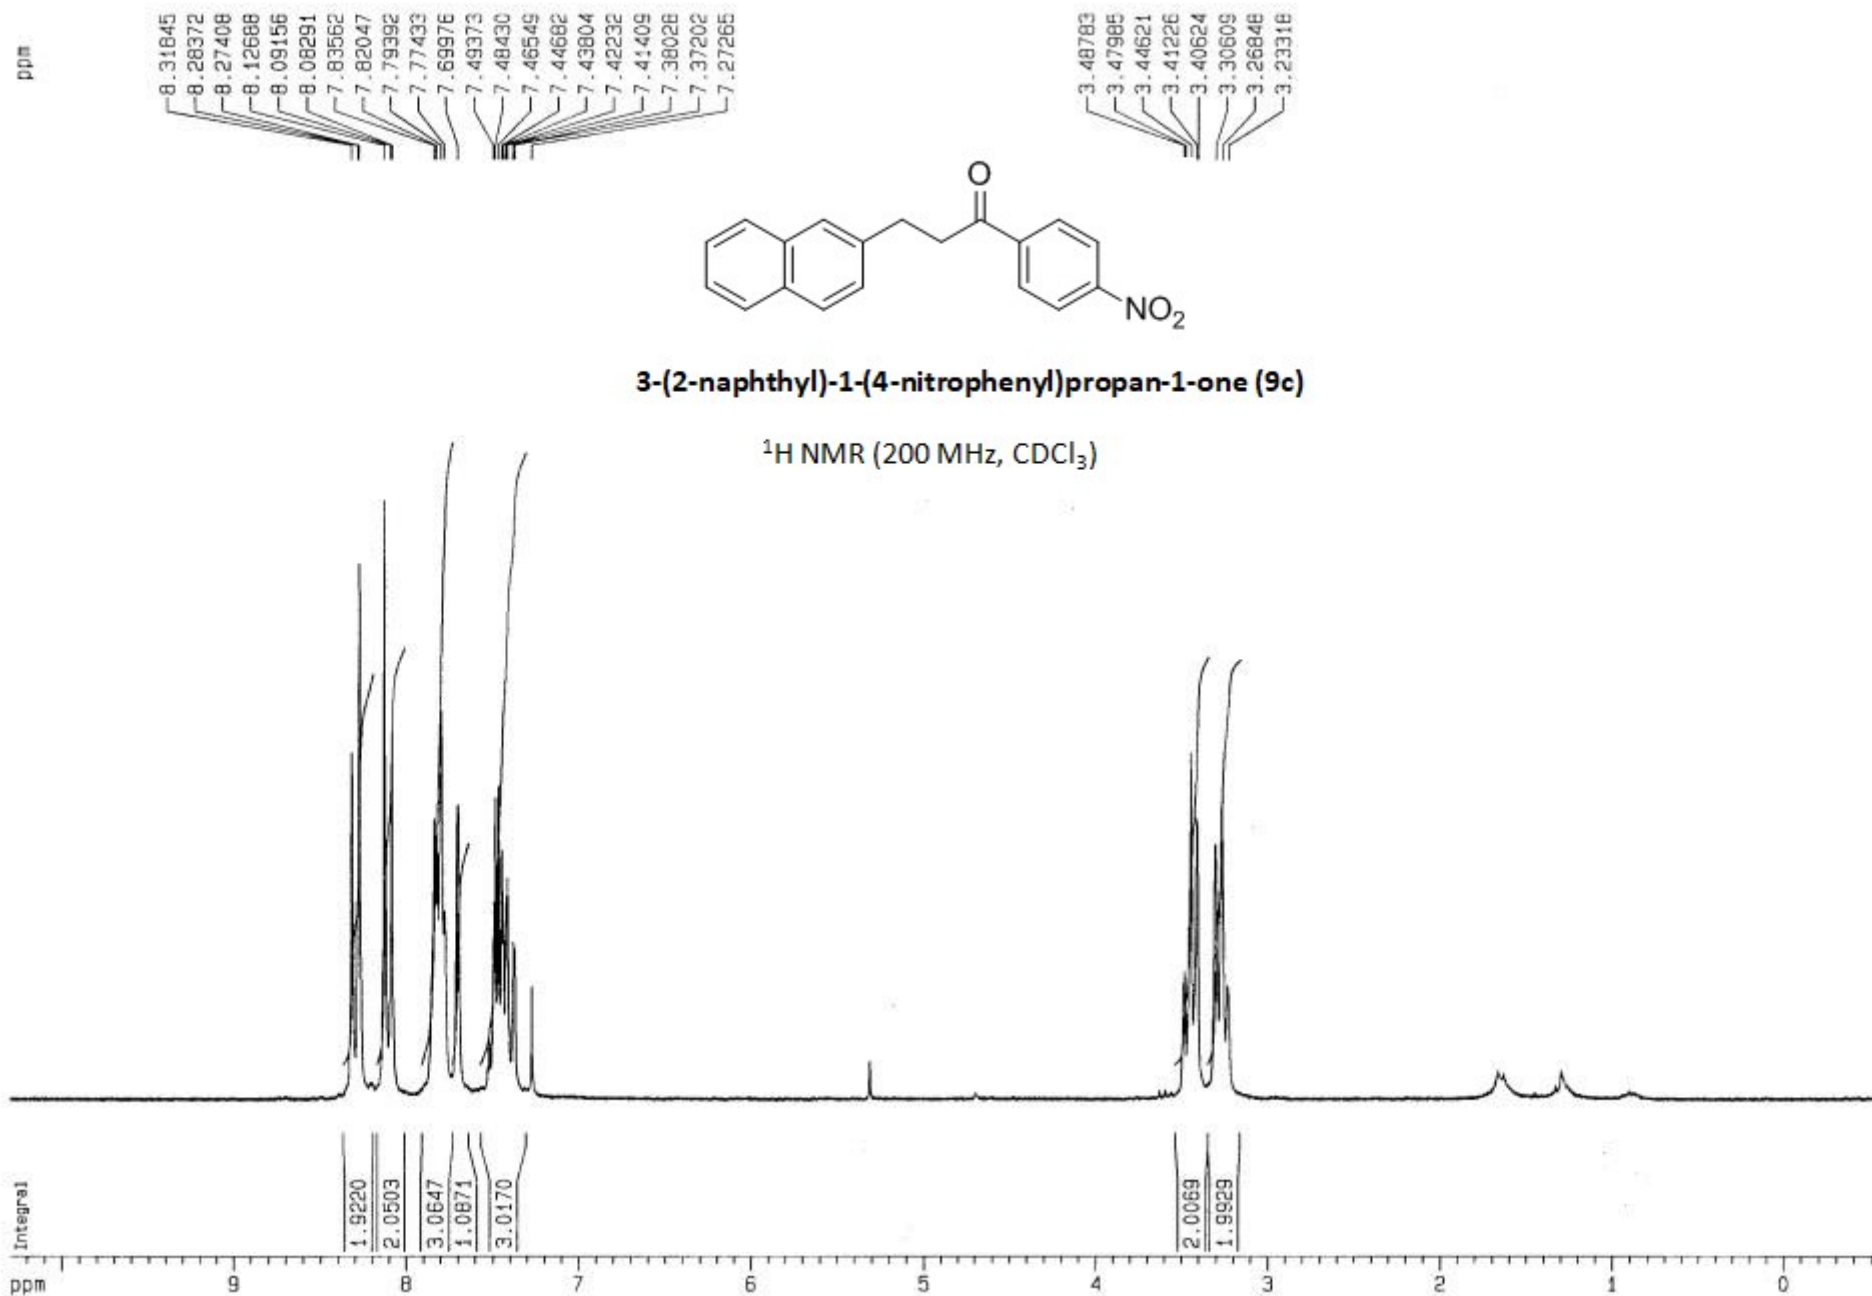

SI 34

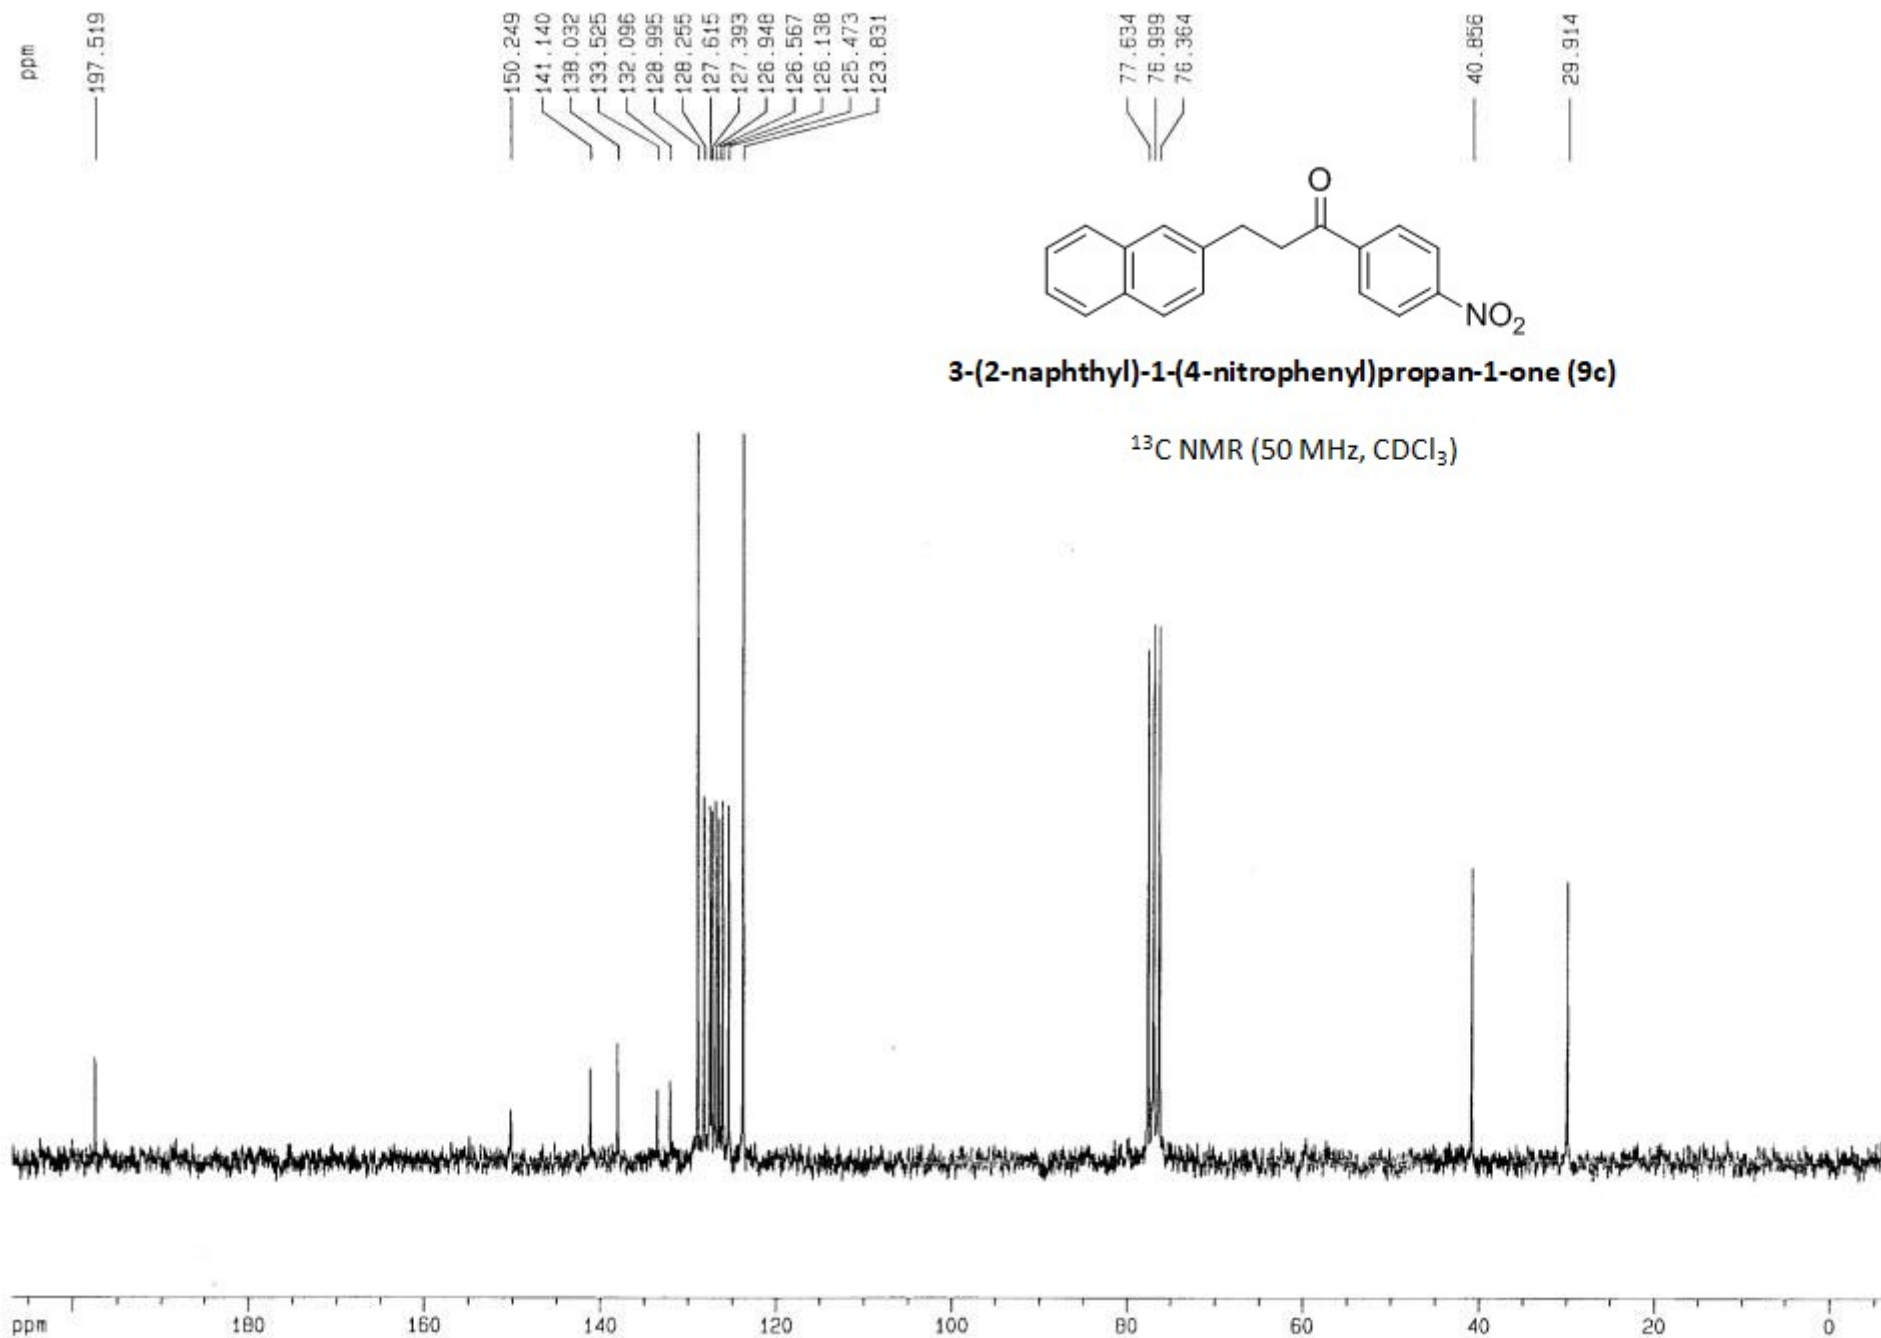

SI 35

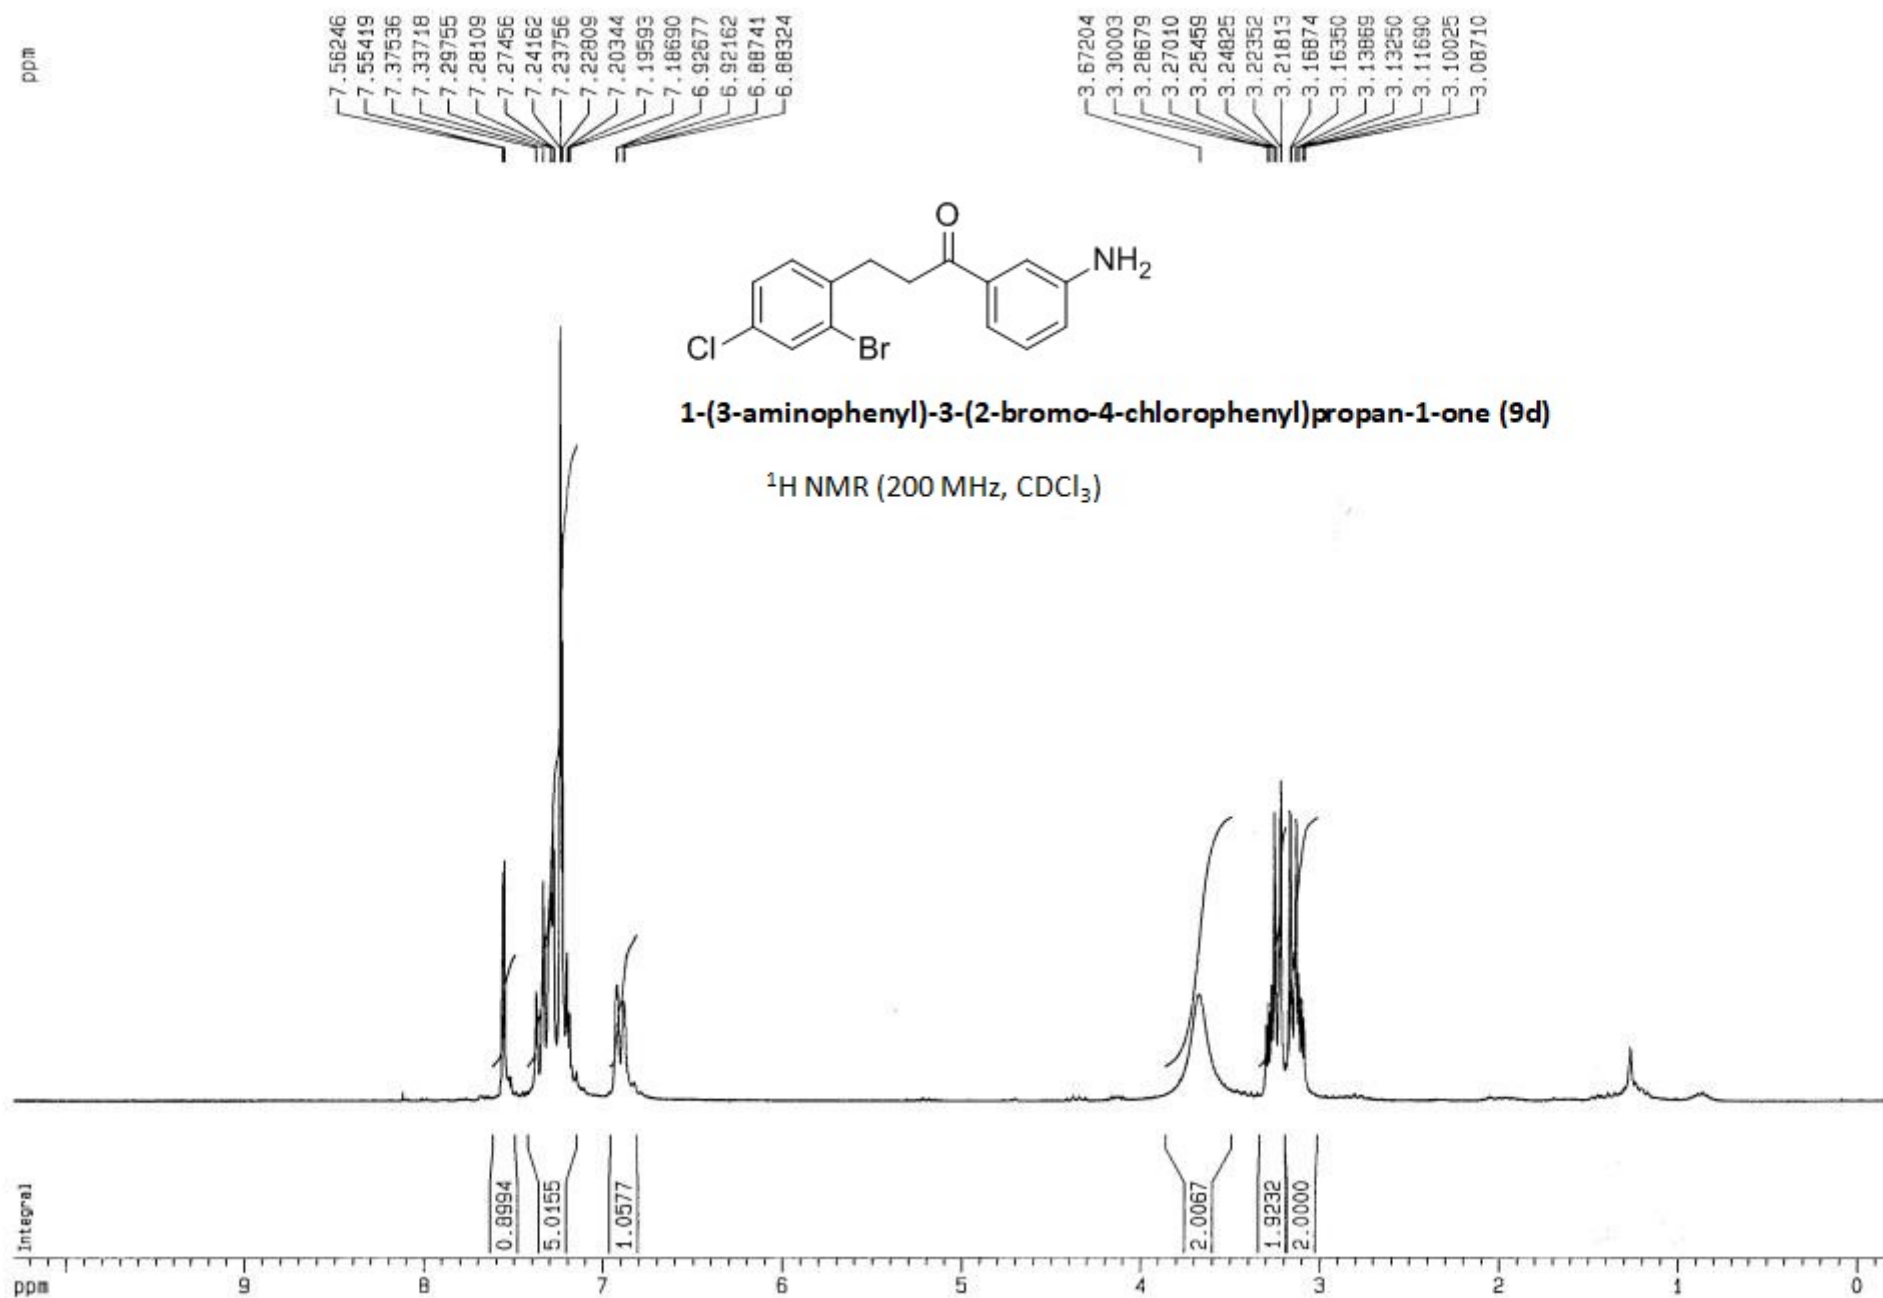

SI 36

ppm  
198.752

146.219  
139.127  
137.668  
132.616  
132.308  
131.480  
129.505  
127.725  
124.486  
119.969  
118.702  
114.085

77.637  
77.001  
76.366

38.330

30.072

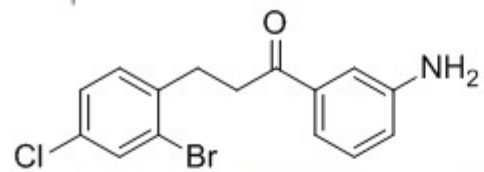

**1-(3-aminophenyl)-3-(2-bromo-4-chlorophenyl)propan-1-one (9d)**

$^{13}\text{C}$  NMR (50 MHz,  $\text{CDCl}_3$ )

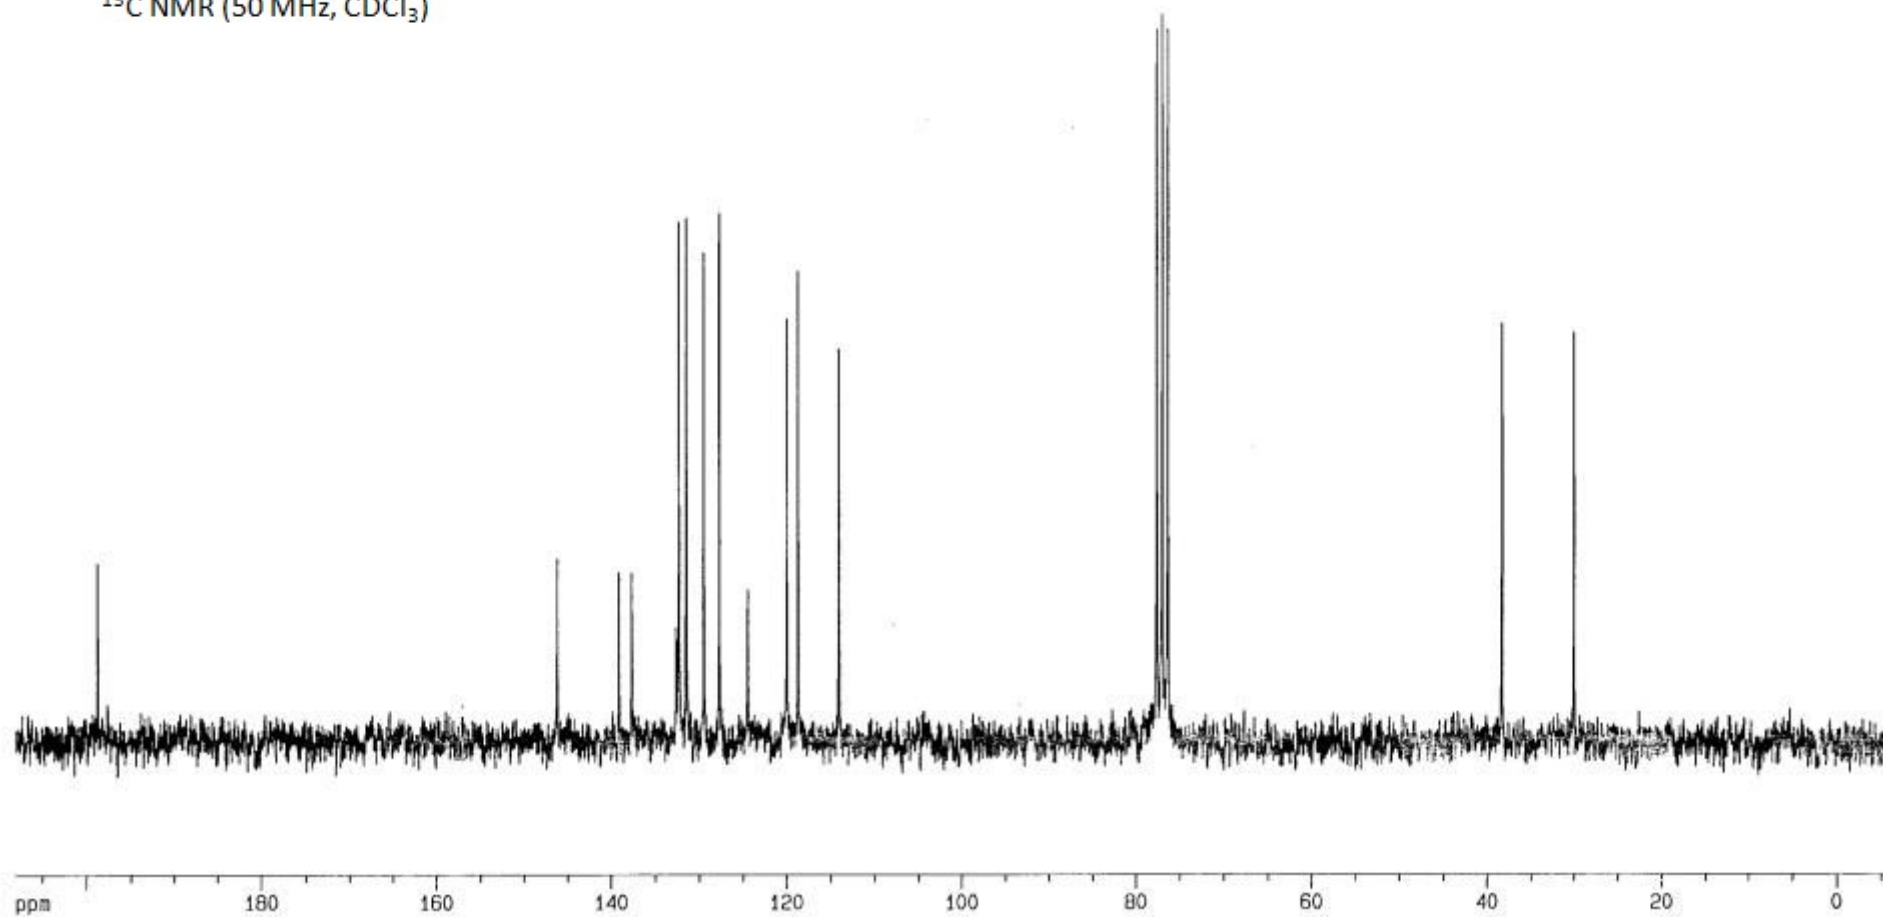

SI 37

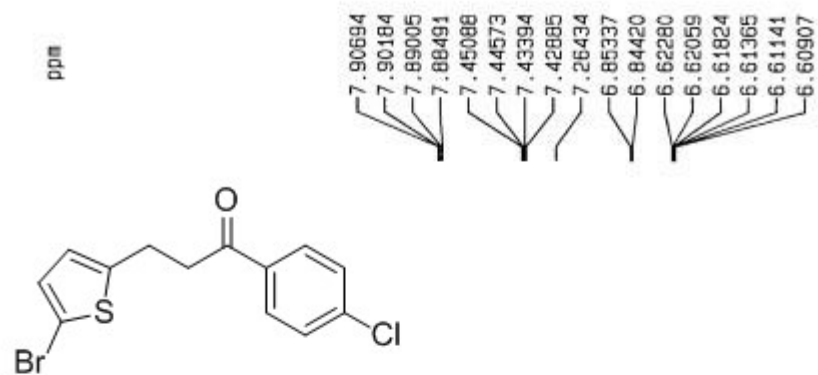

**3-(5-bromo-2-thienyl)-1-(4-chlorophenyl)propan-1-one (9e)**

$^1\text{H}$  NMR (200 MHz,  $\text{CDCl}_3$ )

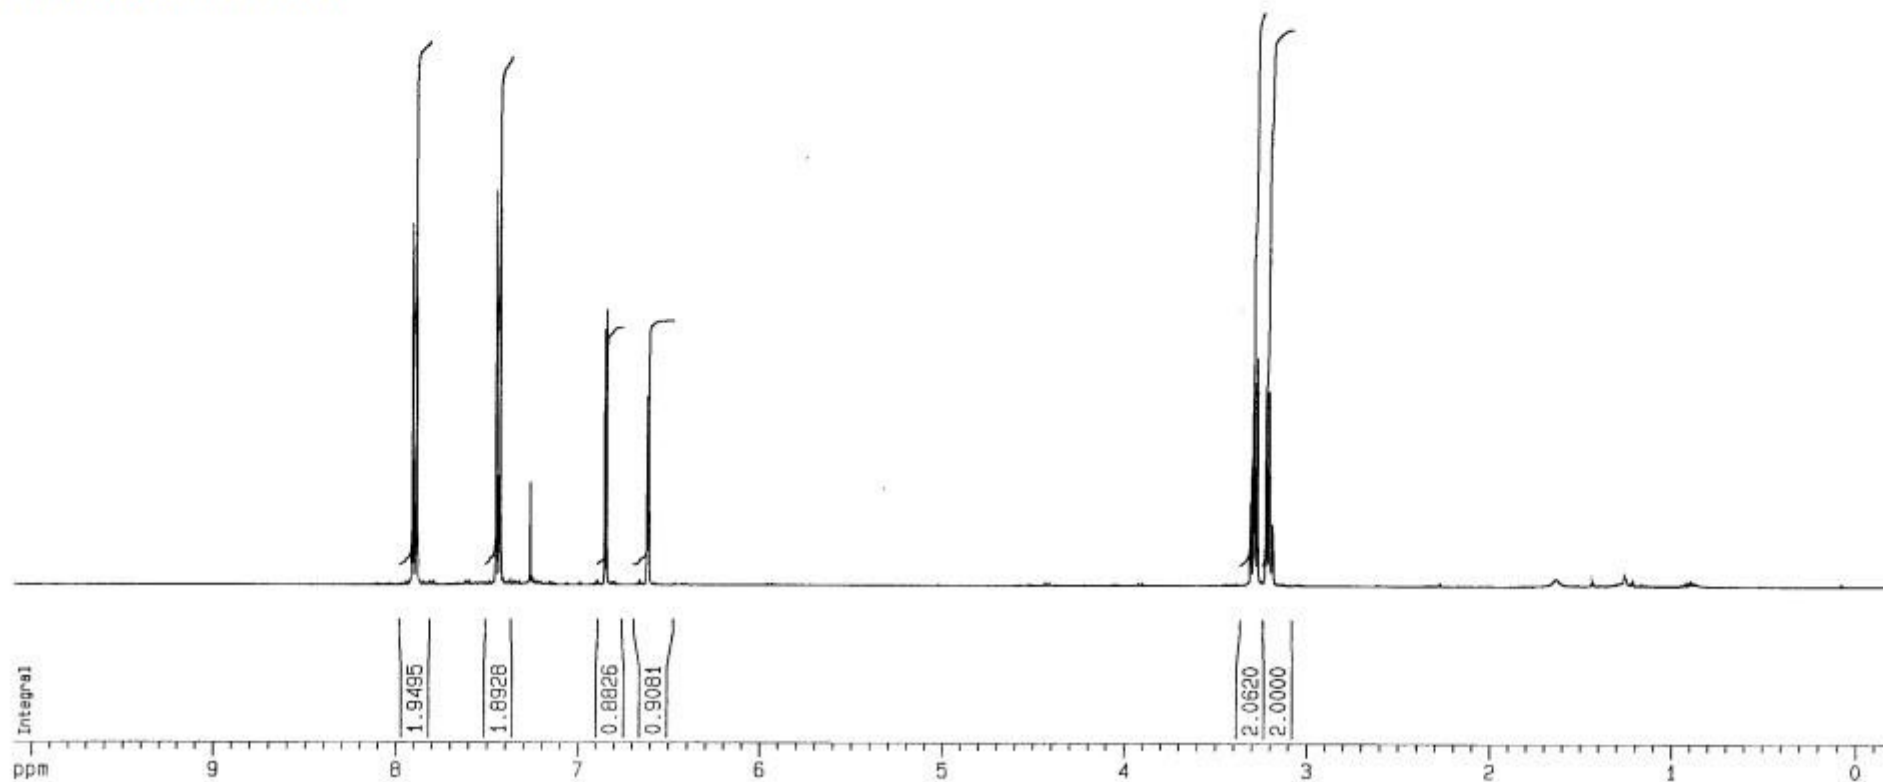

SI 38

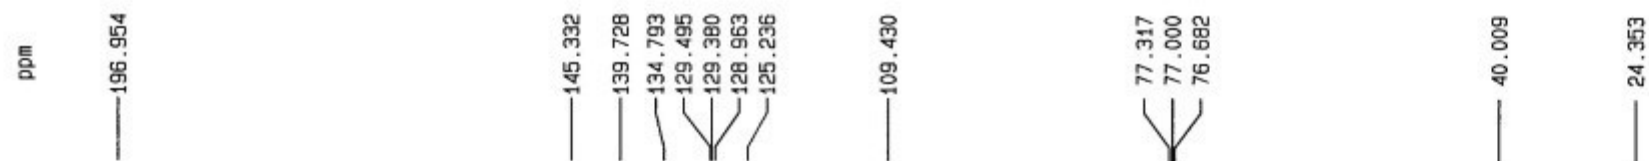

3-(5-bromo-2-thienyl)-1-(4-chlorophenyl)propan-1-one (9e)

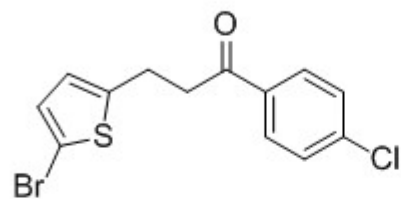

$^{13}\text{C}$  NMR (50 MHz,  $\text{CDCl}_3$ )

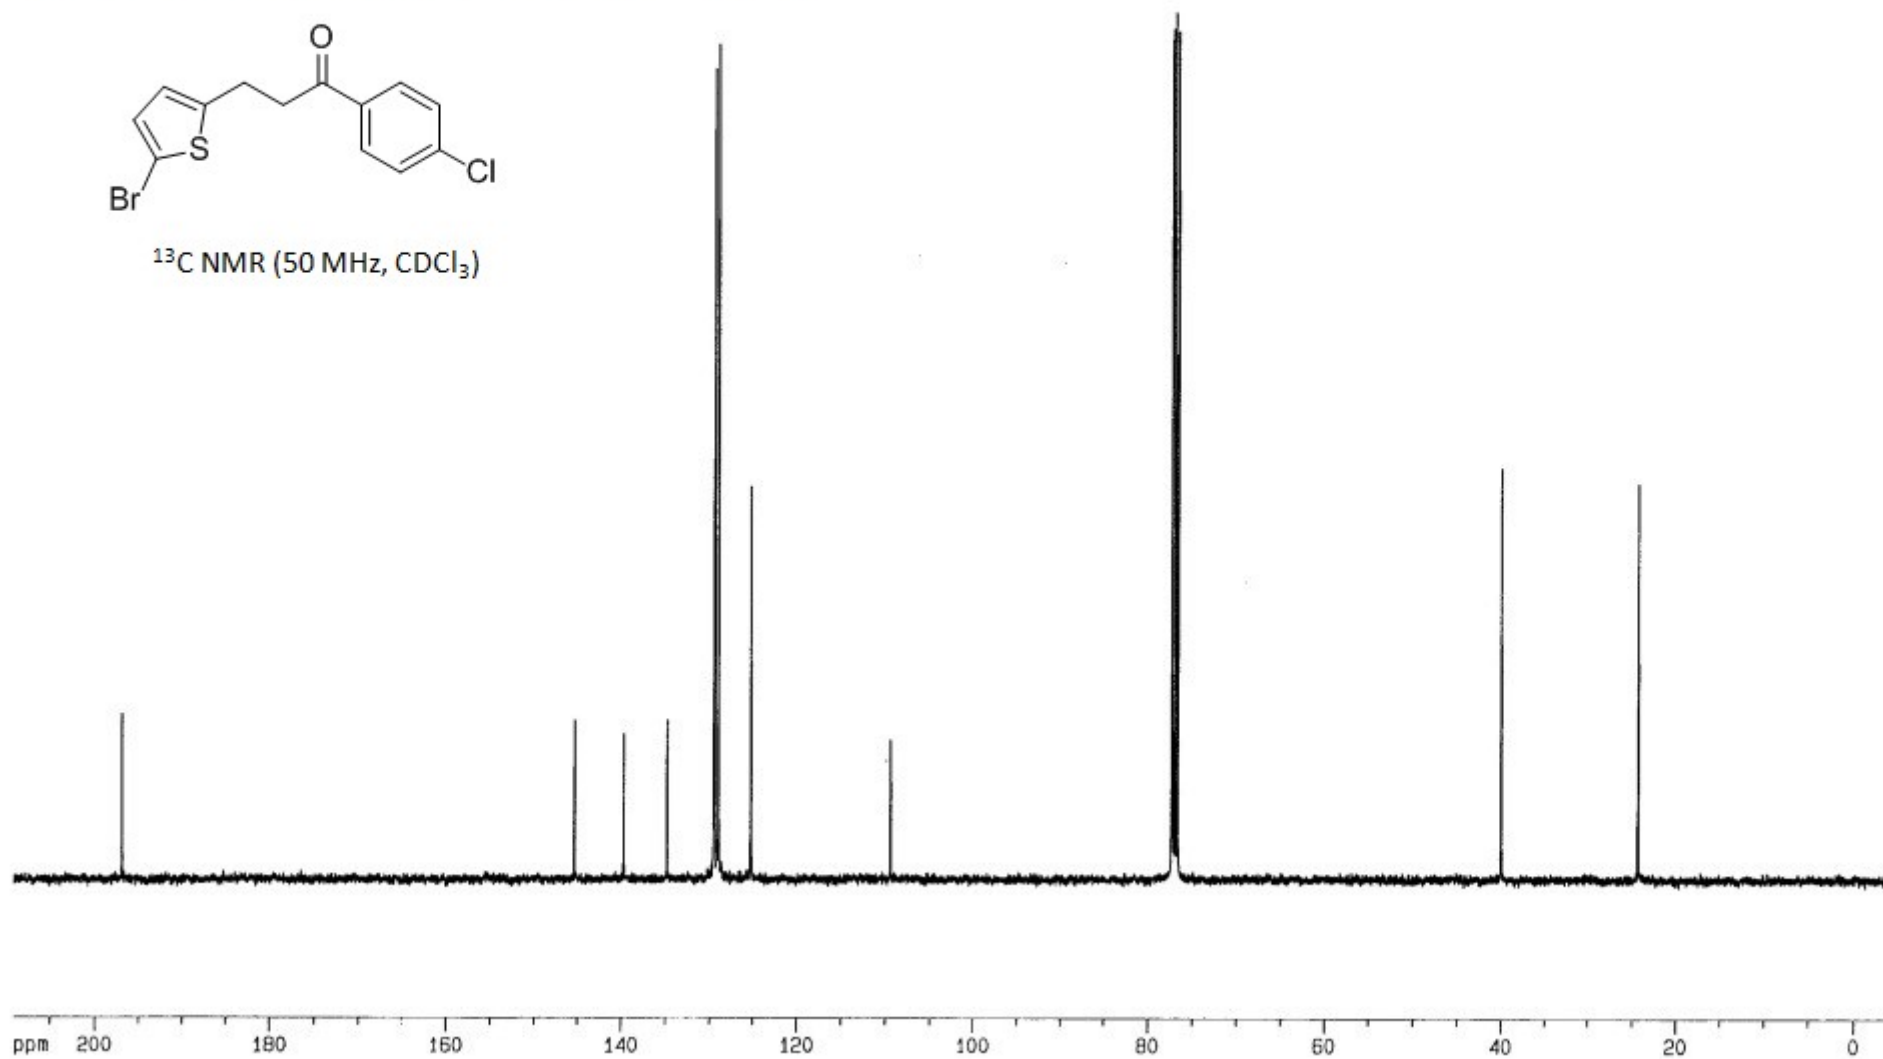

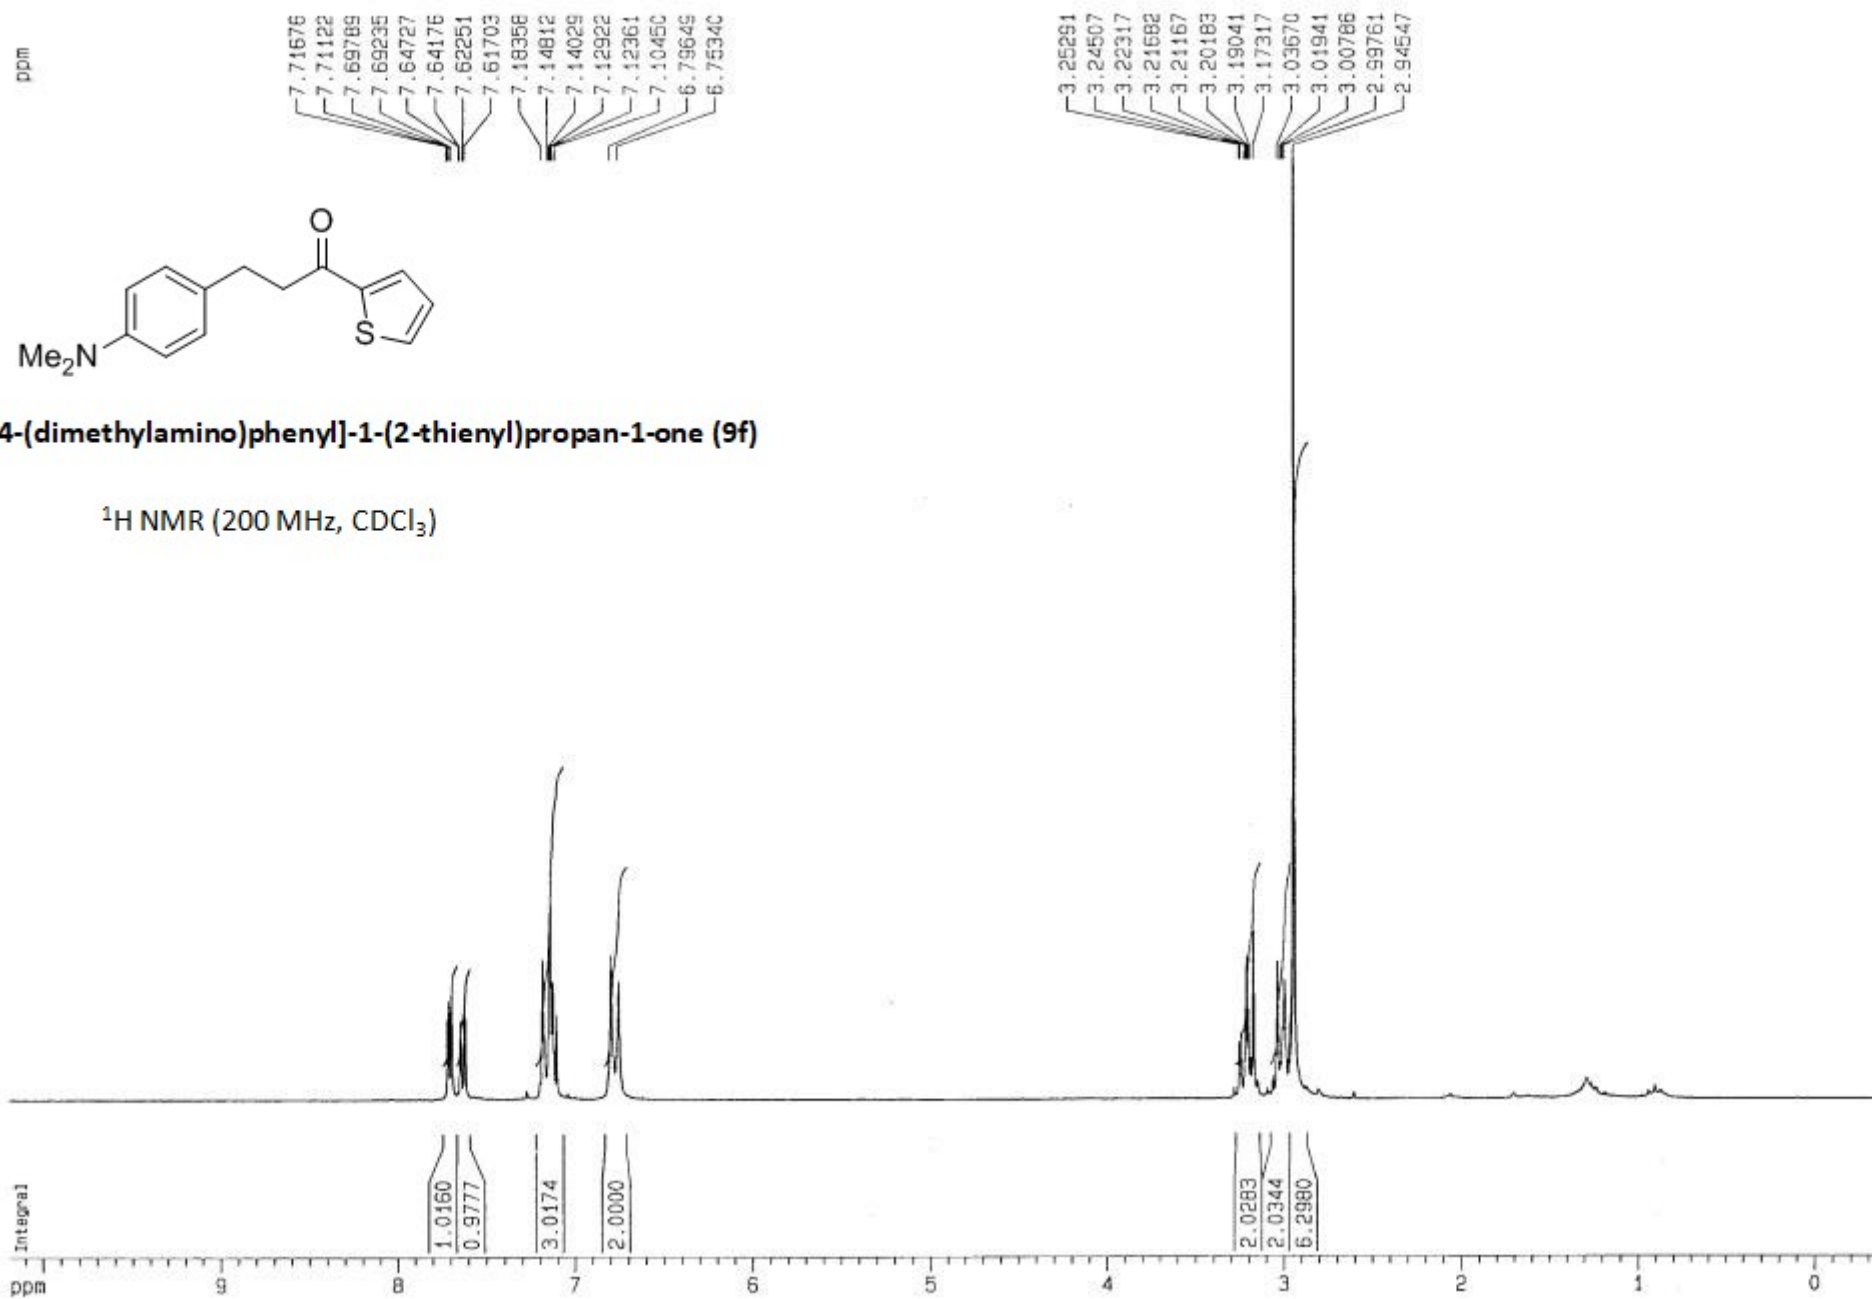

SI 40

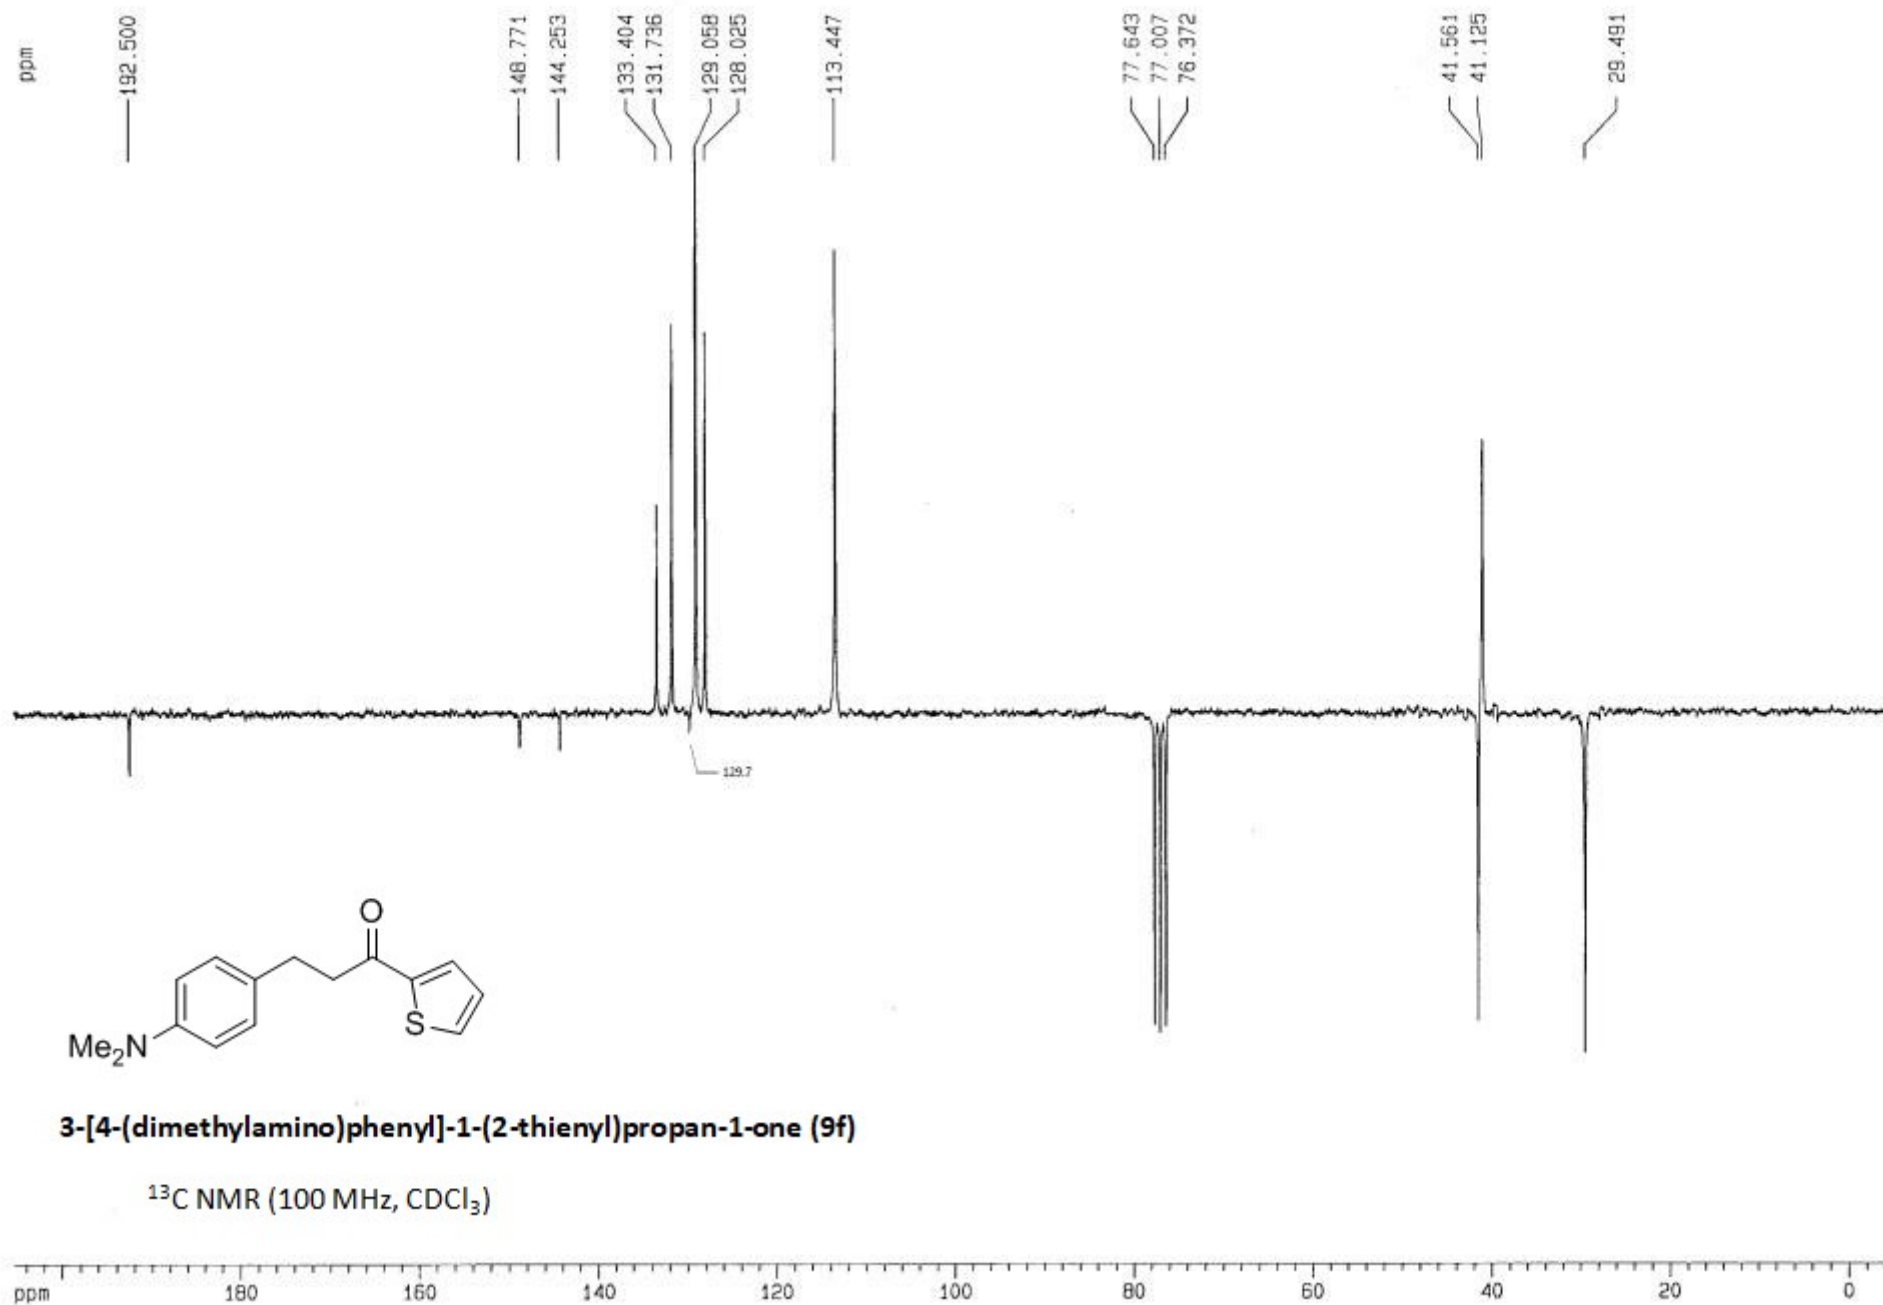



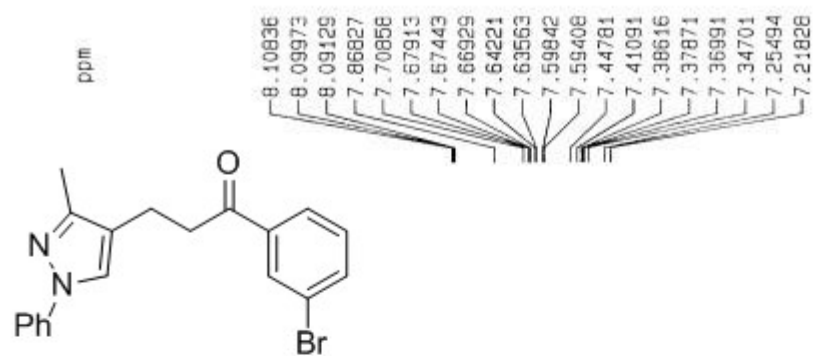

**1-(3-bromophenyl)-3-(3-methyl-1-phenyl-1H-pyrazol-4-yl)propan-1-one (9g)**

$^1\text{H}$  NMR (200 MHz,  $\text{CDCl}_3$ )

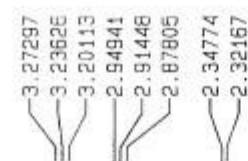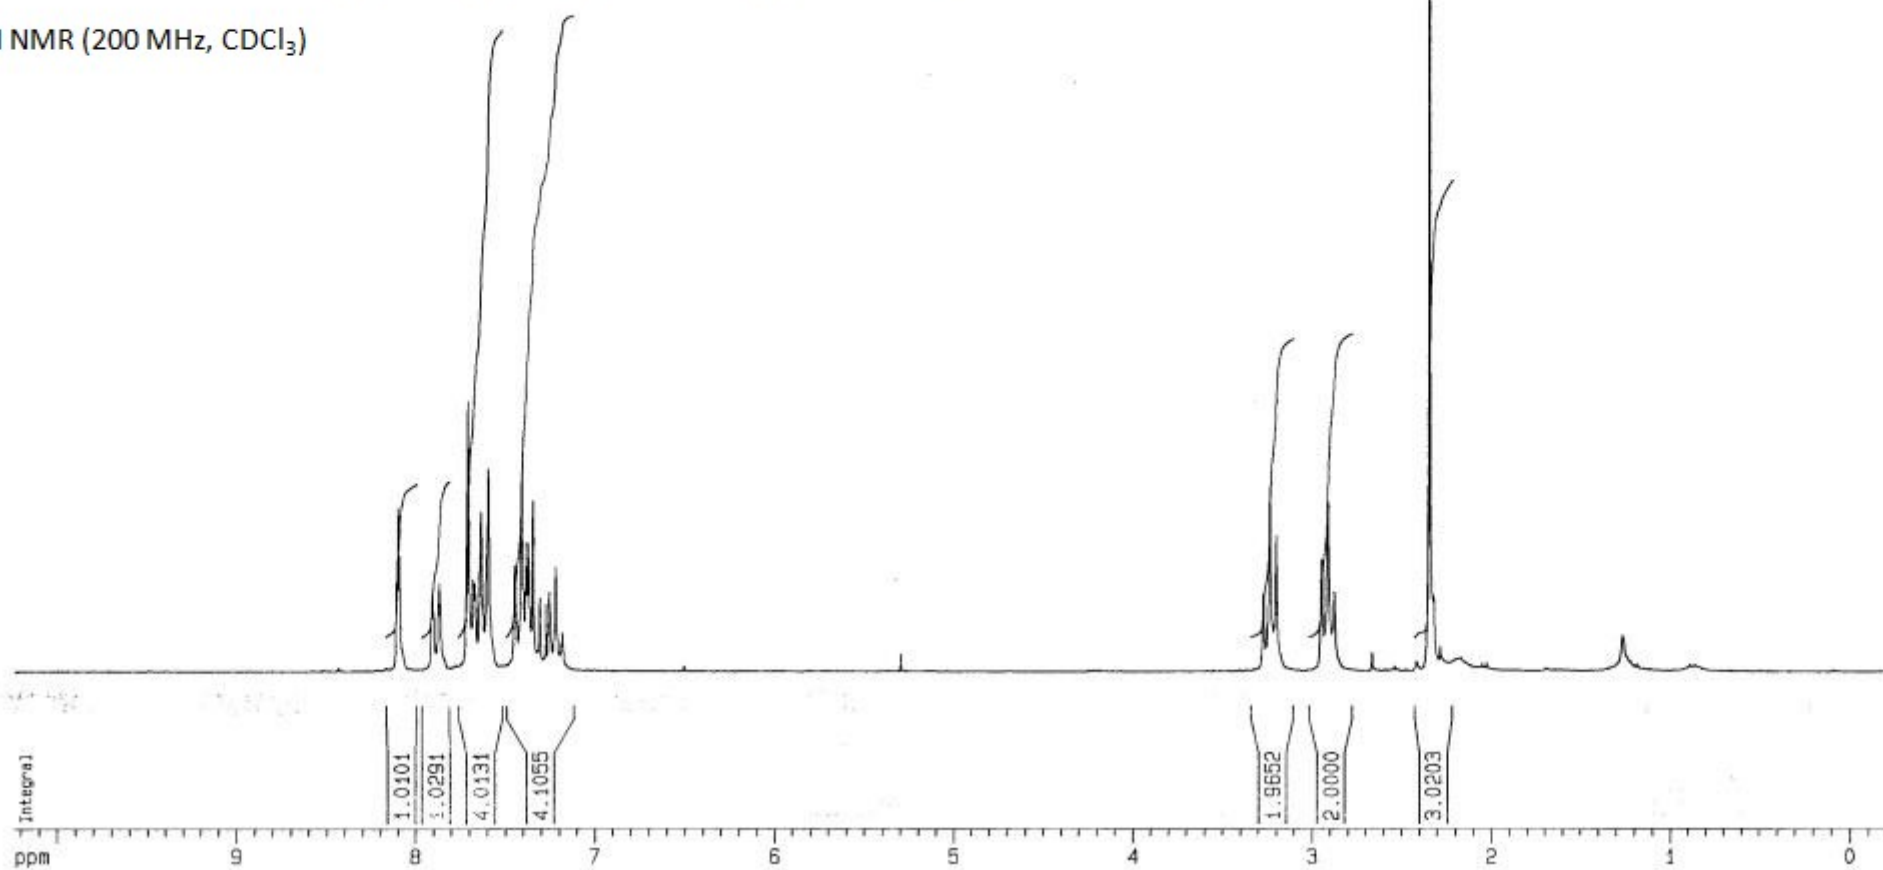

SI 42

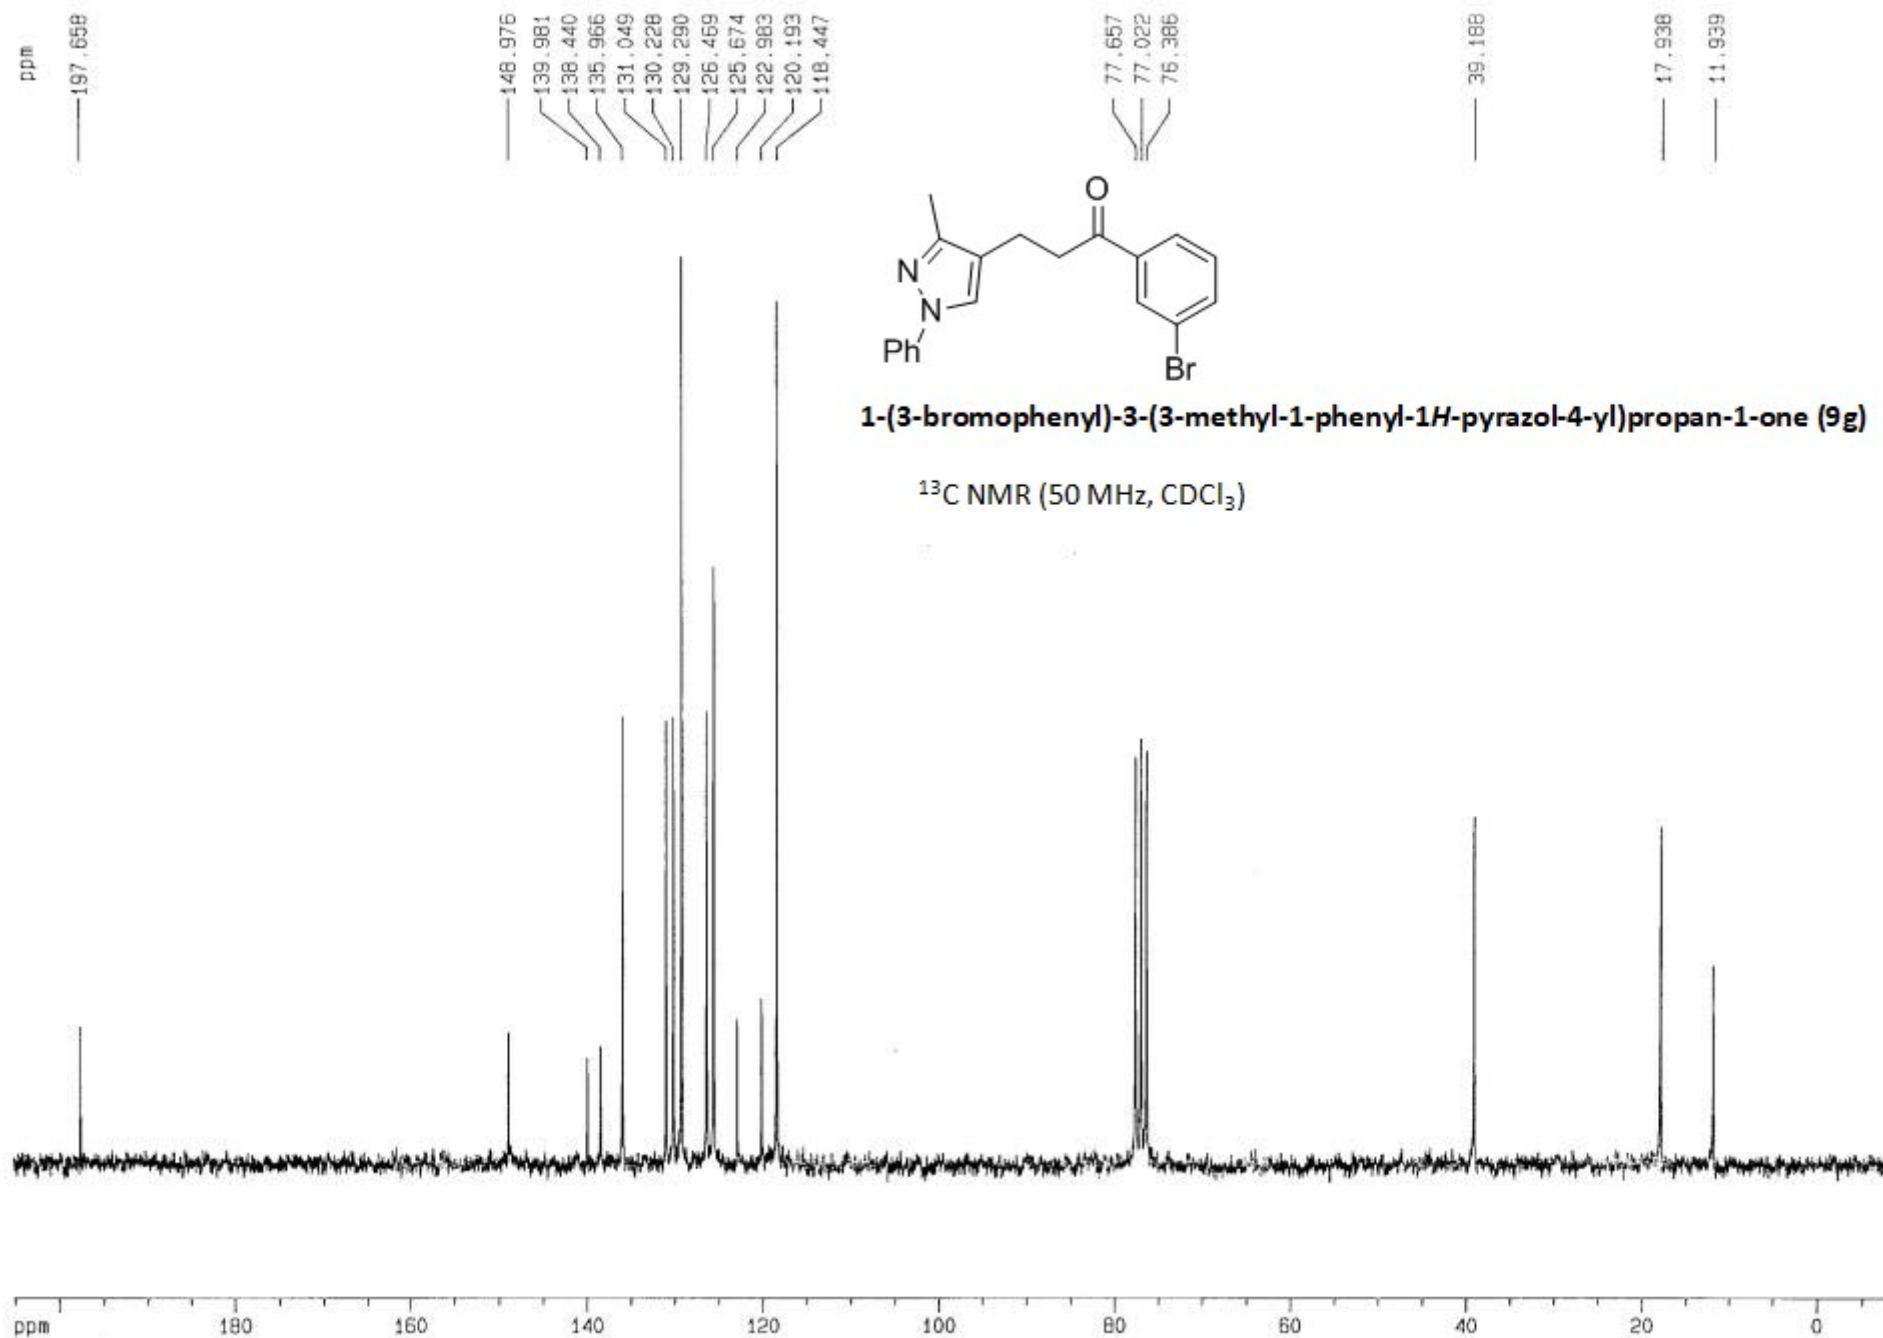

SI 43

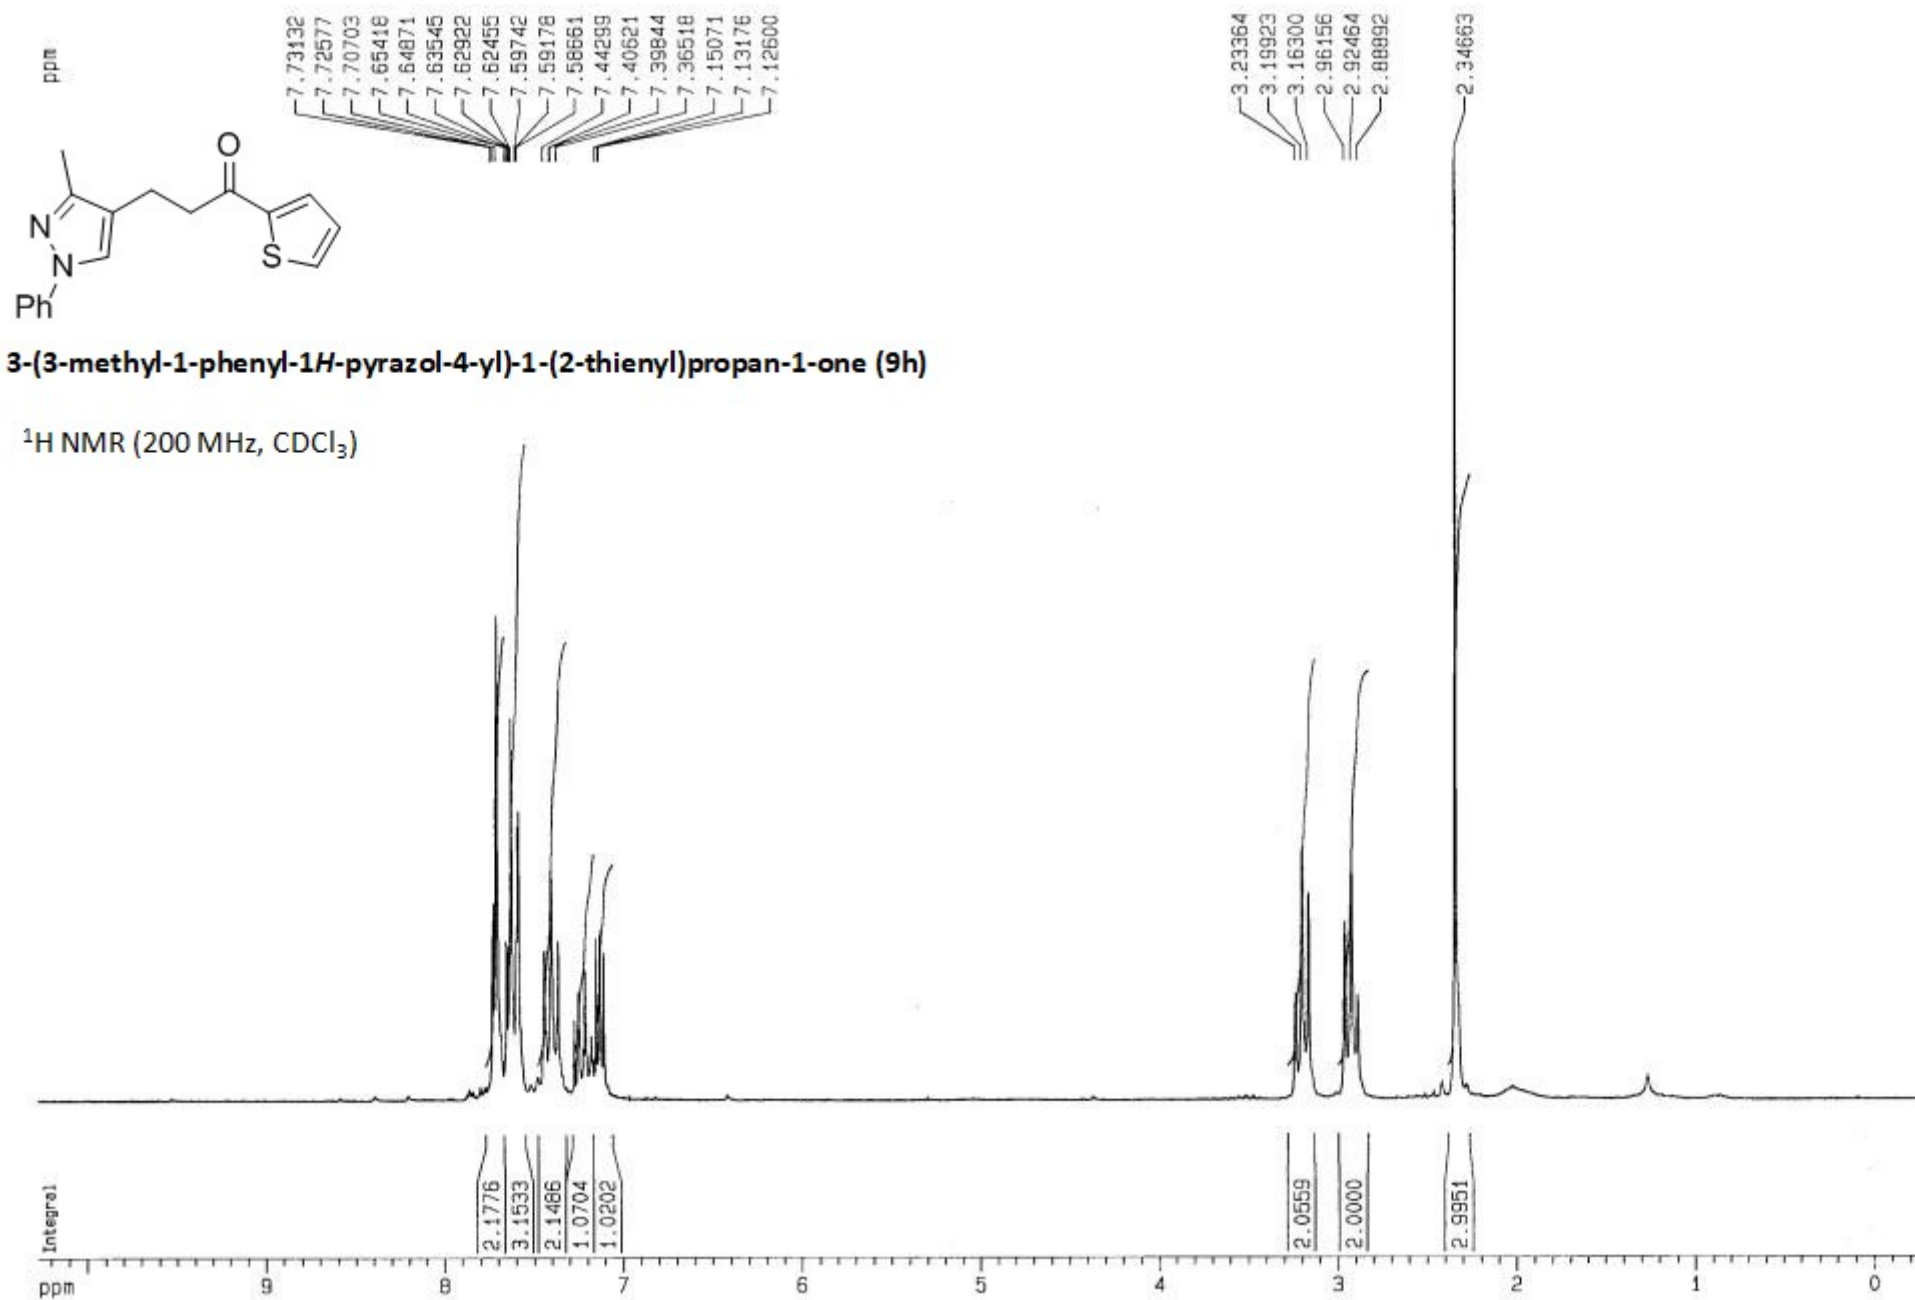

SI 44

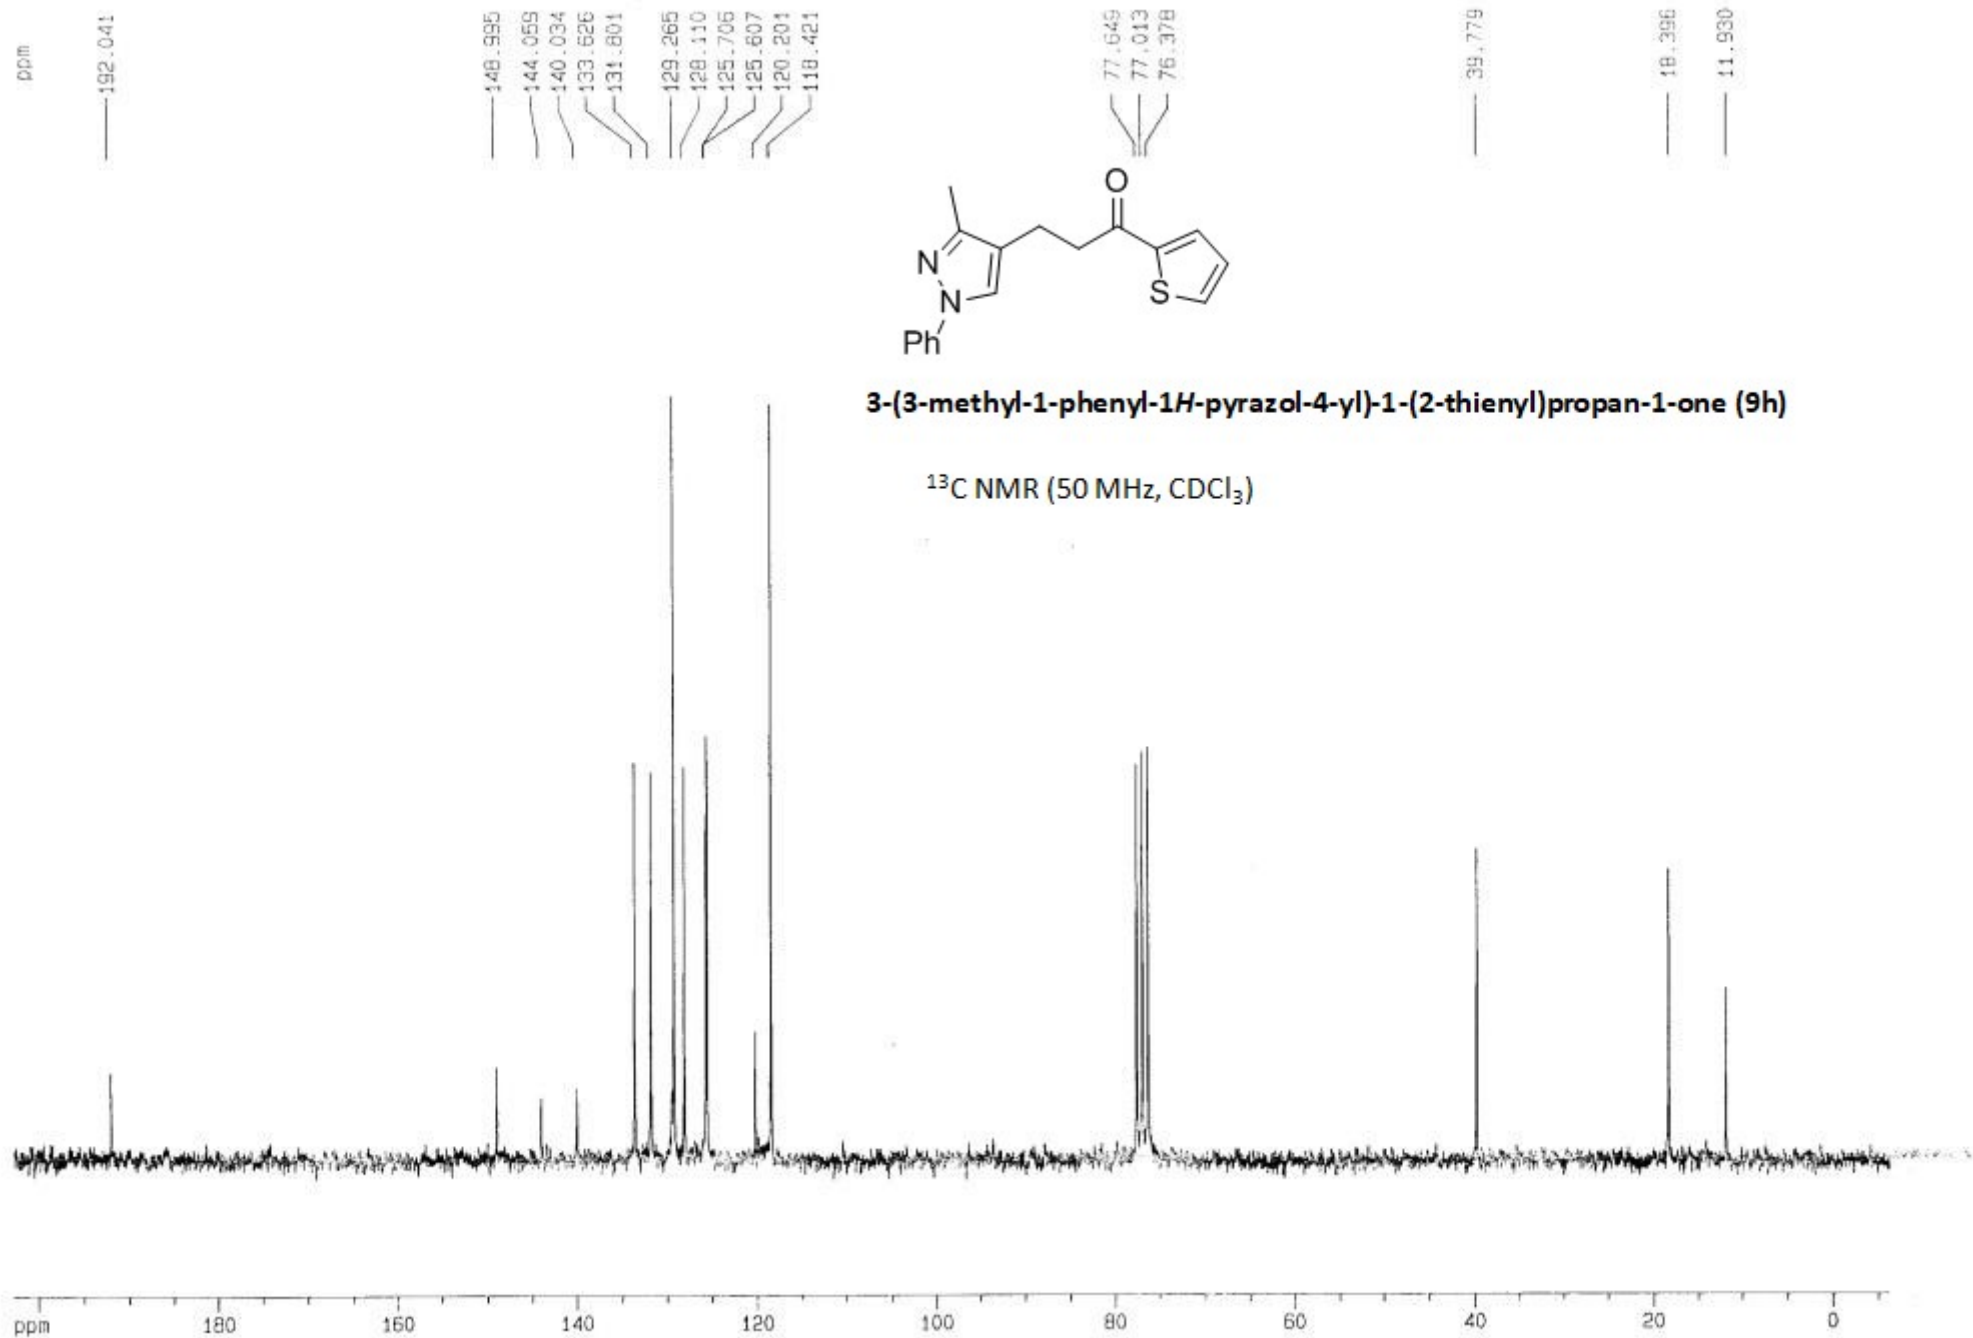

SI 45

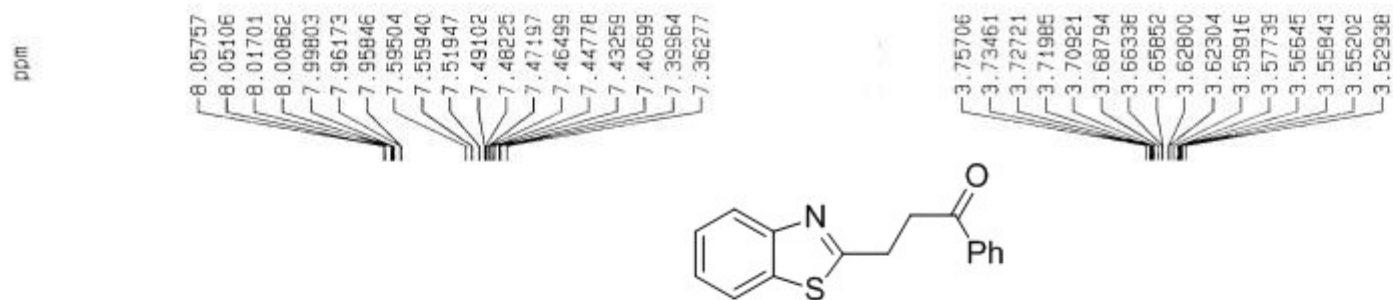

**3-(1,3-benzothiazol-2-yl)-1-phenylpropan-1-one (9i)**

$^1\text{H}$  NMR (200 MHz,  $\text{CDCl}_3$ )

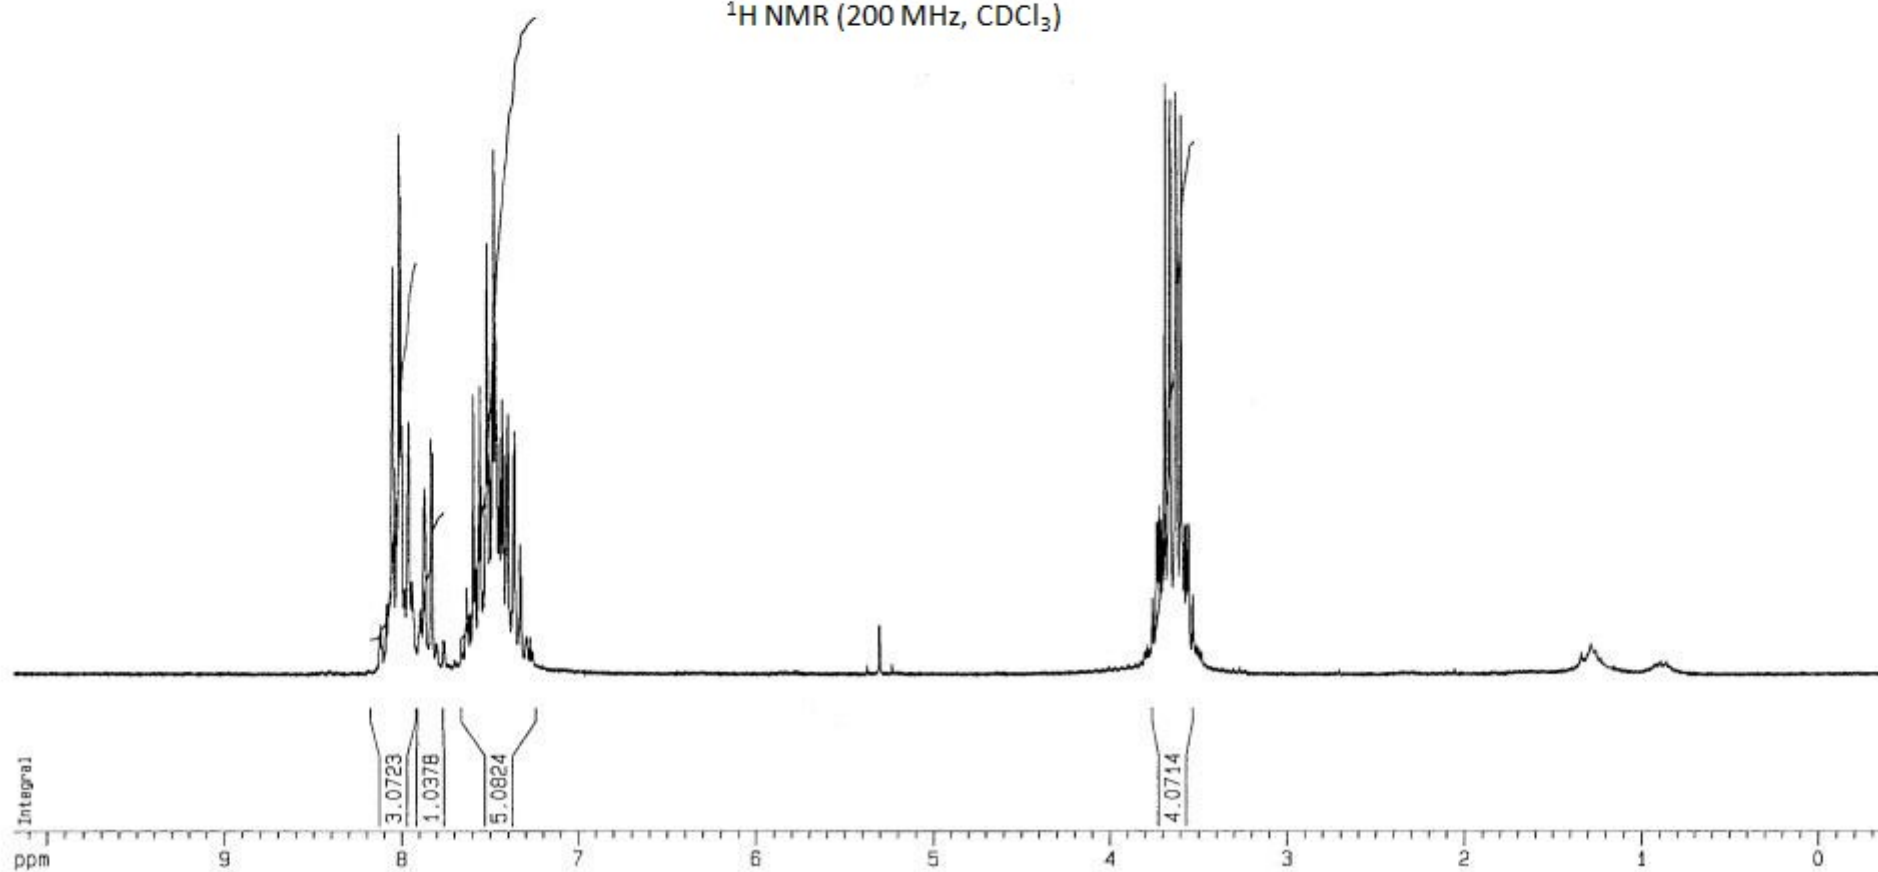

SI 46

ppm

7.3307  
7.2990  
7.2897  
7.2691  
7.2621  
7.2502  
7.2391  
7.2302  
7.205E  
7.195E  
7.185E  
7.1754  
7.160E  
7.1534  
7.155E  
7.145E

2.949E  
2.9414  
2.907E  
2.873E  
2.86E  
2.780E  
2.761E  
2.732E  
2.727E  
2.720E  
2.693E  
2.604E

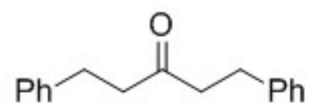

**1,5-diphenylpentan-3-one (9j)**

<sup>1</sup>H NMR (200 MHz, CDCl<sub>3</sub>)

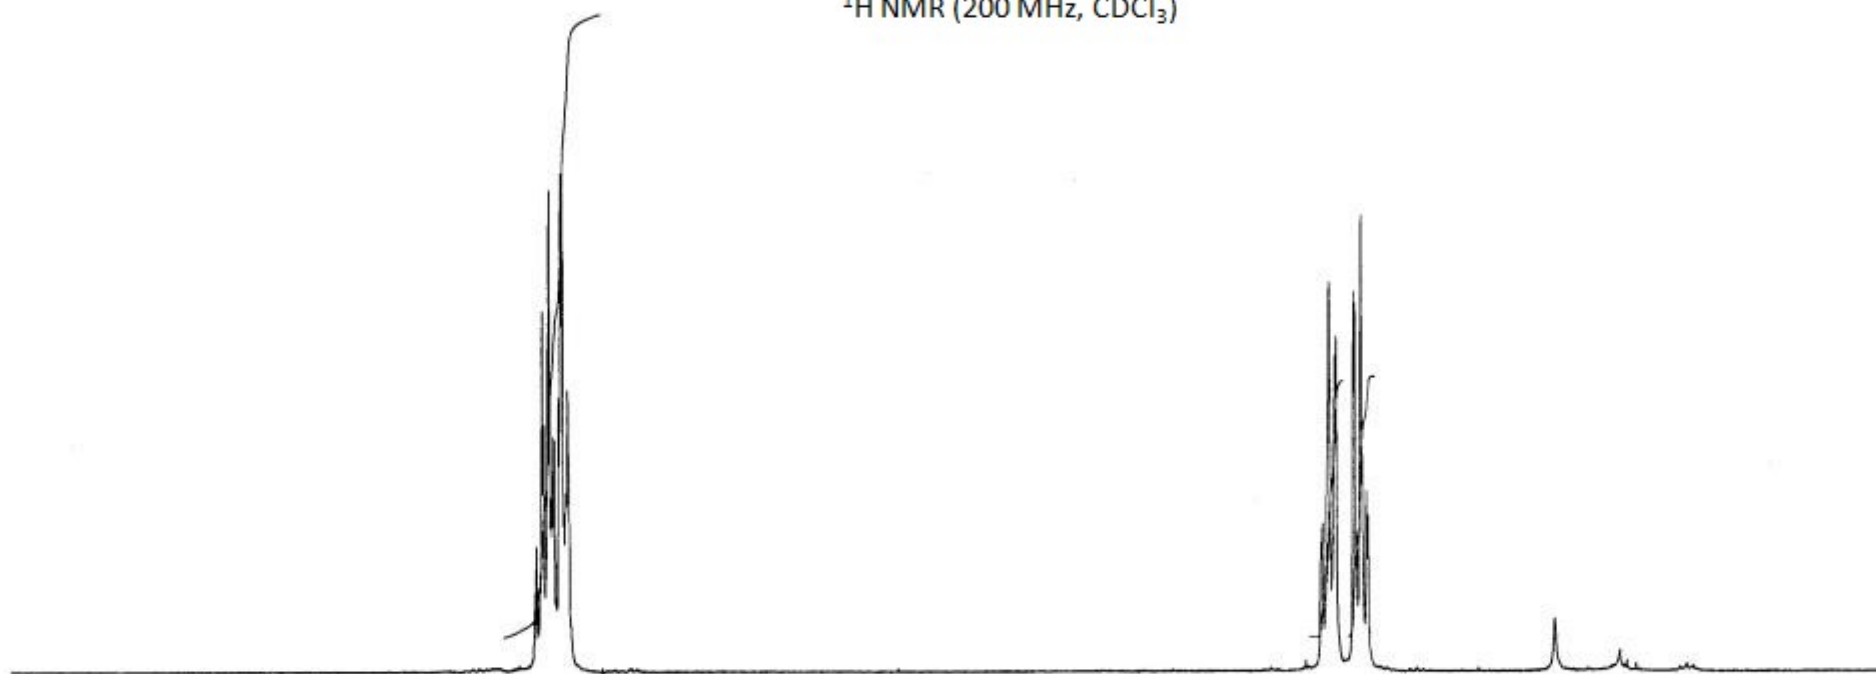

Integrat  
ppm

9.7632

4.0000  
4.0701

9 8 7 6 5 4 3 2 1 0

SI 47

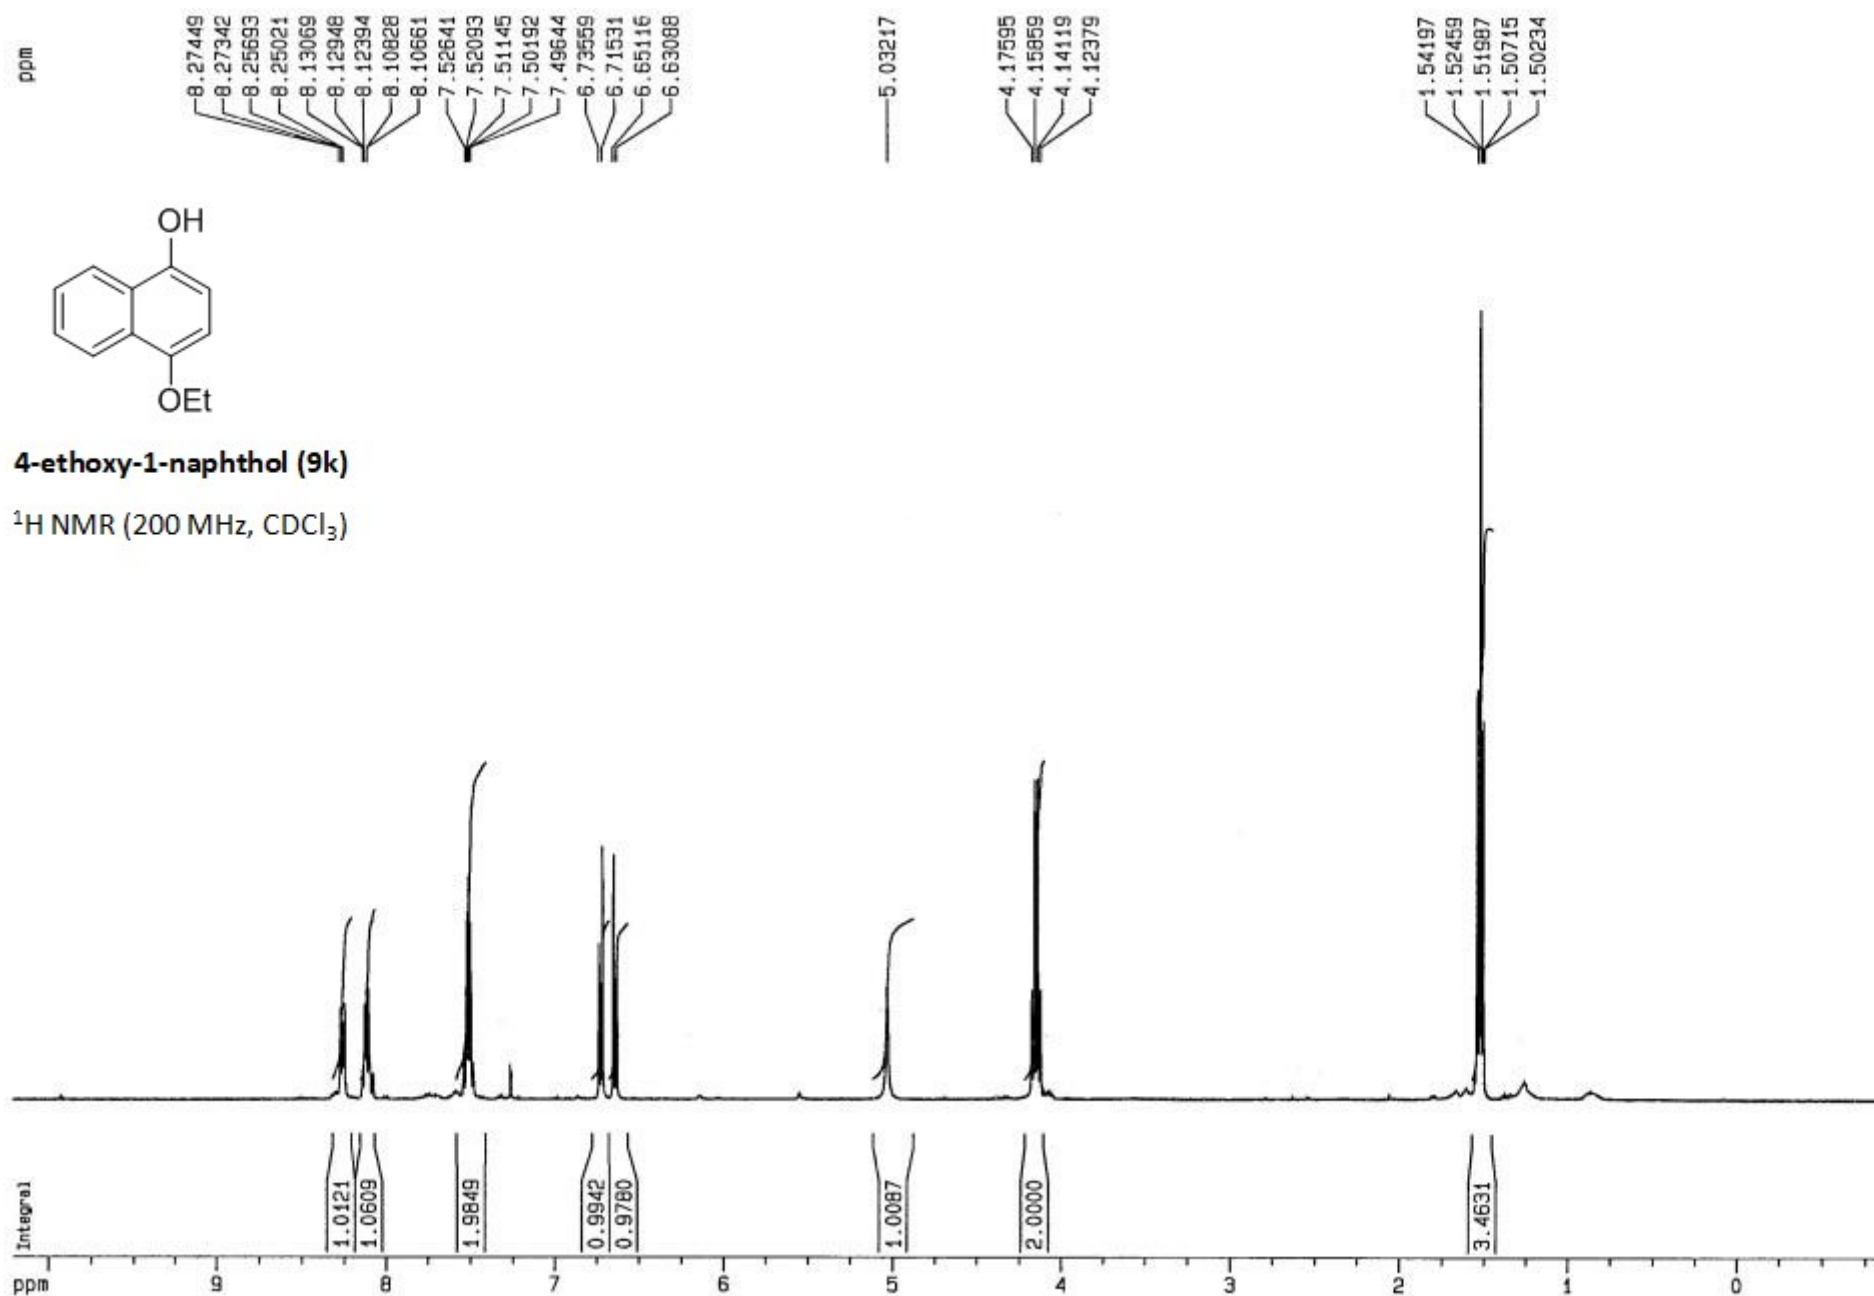

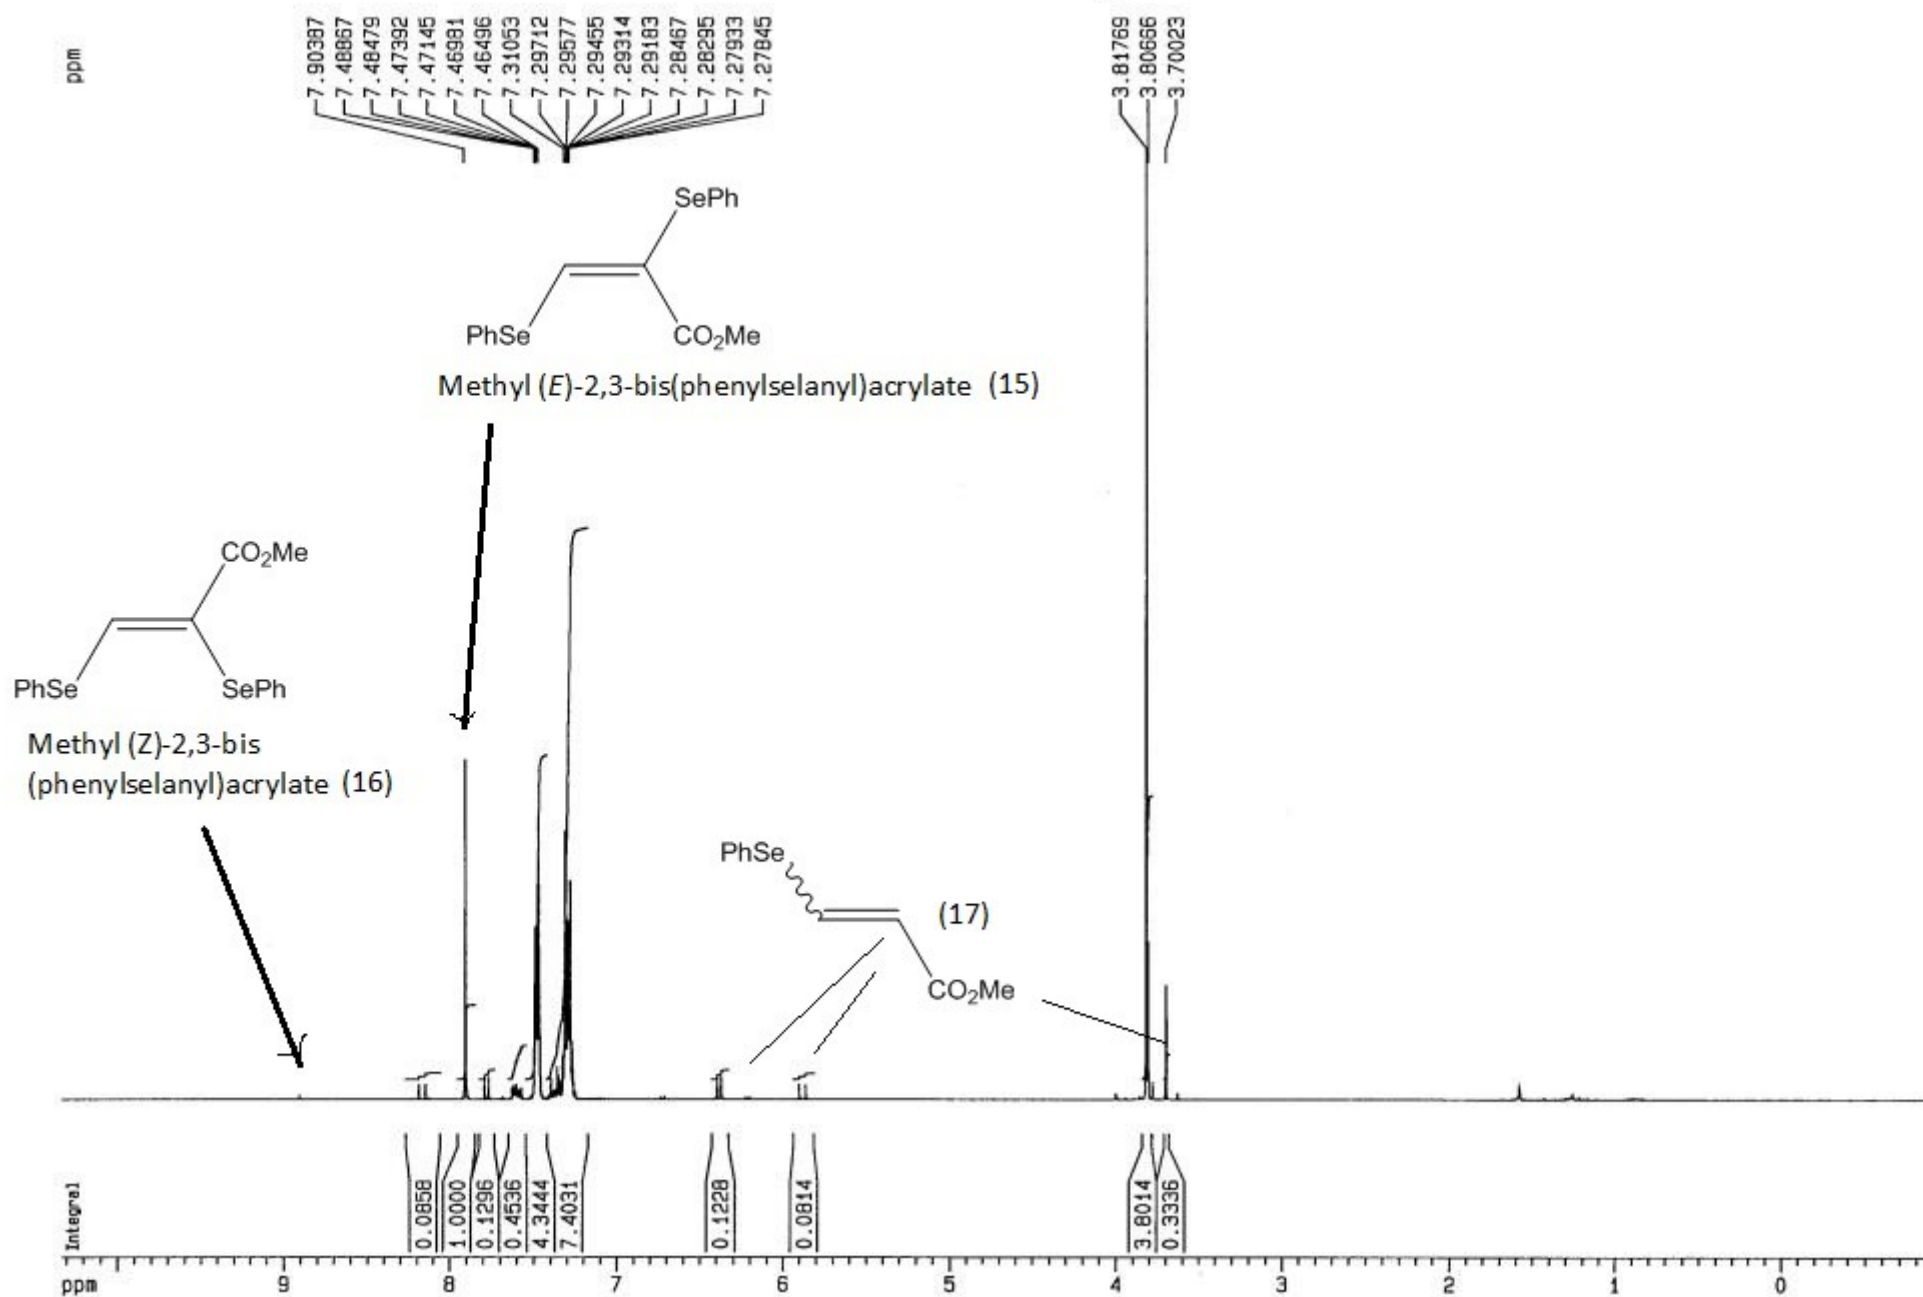



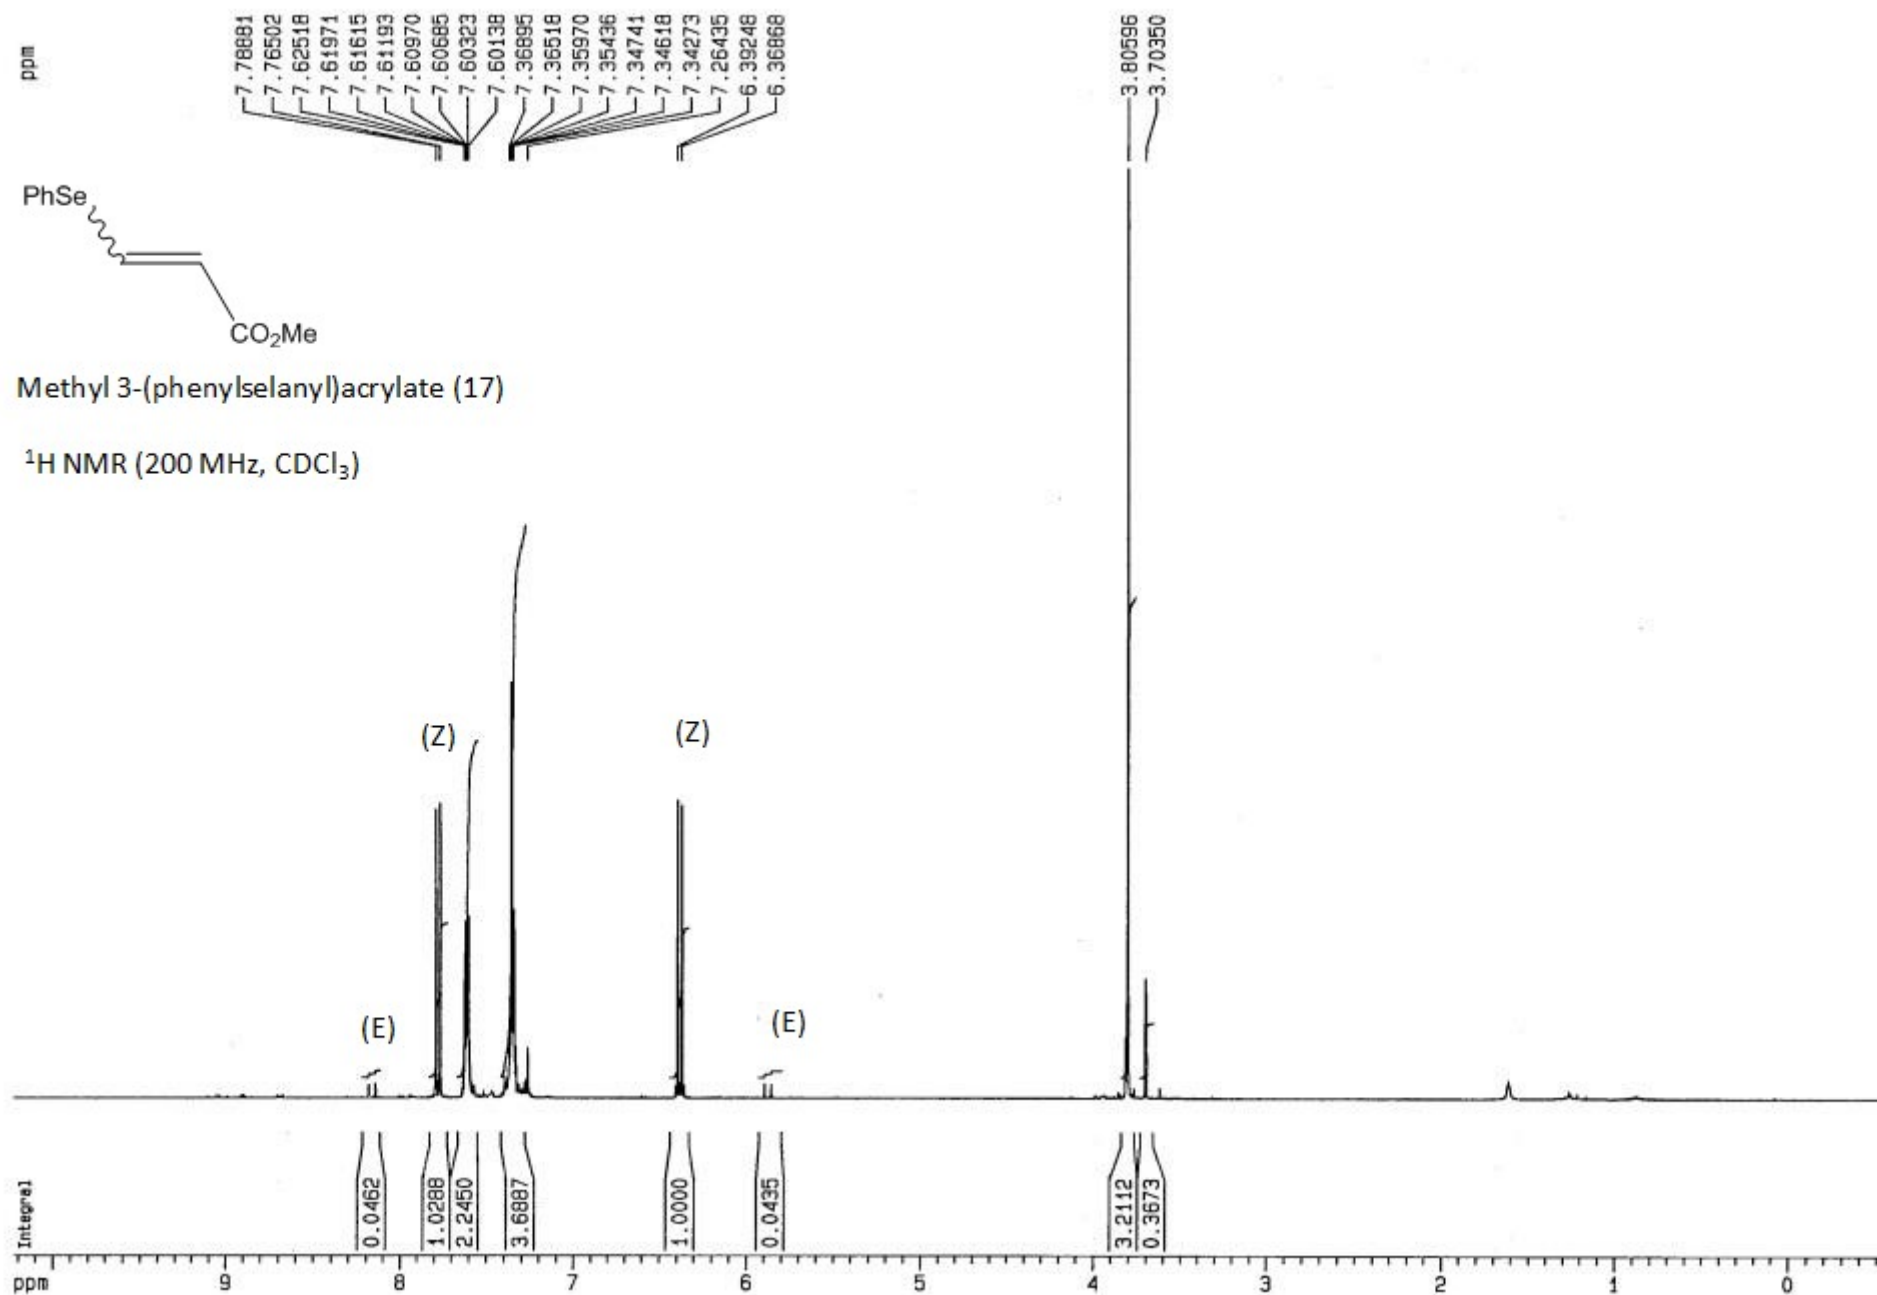

Supplement: d0ra07128e1.pdf [file d0ra07128e1.pdf]
